# Supplementary material for: Xanthine-based photoaffinity probes allow assessment of ligand engagement by TRPC5 channels
Source: Royal Society of Chemistry journal article supplement (doi:10.1039/d0cb00126k), 2020-01-01
Supplement: d0cb00126k1.pdf [file d0cb00126k1.pdf]

## Supplementary Information

### Table of Contents

|                               |    |
|-------------------------------|----|
| Supplementary Figures .....   | 1  |
| Supplementary Tables .....    | 13 |
| Supplementary Methods .....   | 14 |
| Supplementary References..... | 55 |

### Supplementary Figures

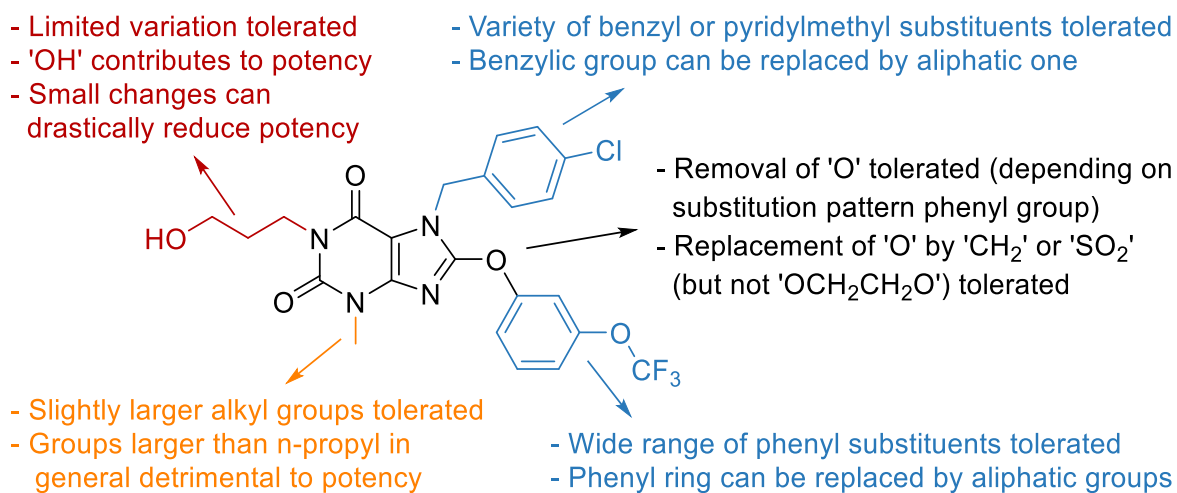

**Supplementary Figure 1.** Structure activity relationship of xanthine-based TRPC1/4/5 inhibitors based on semi-quantitative data reported in the patent literature.<sup>1</sup>

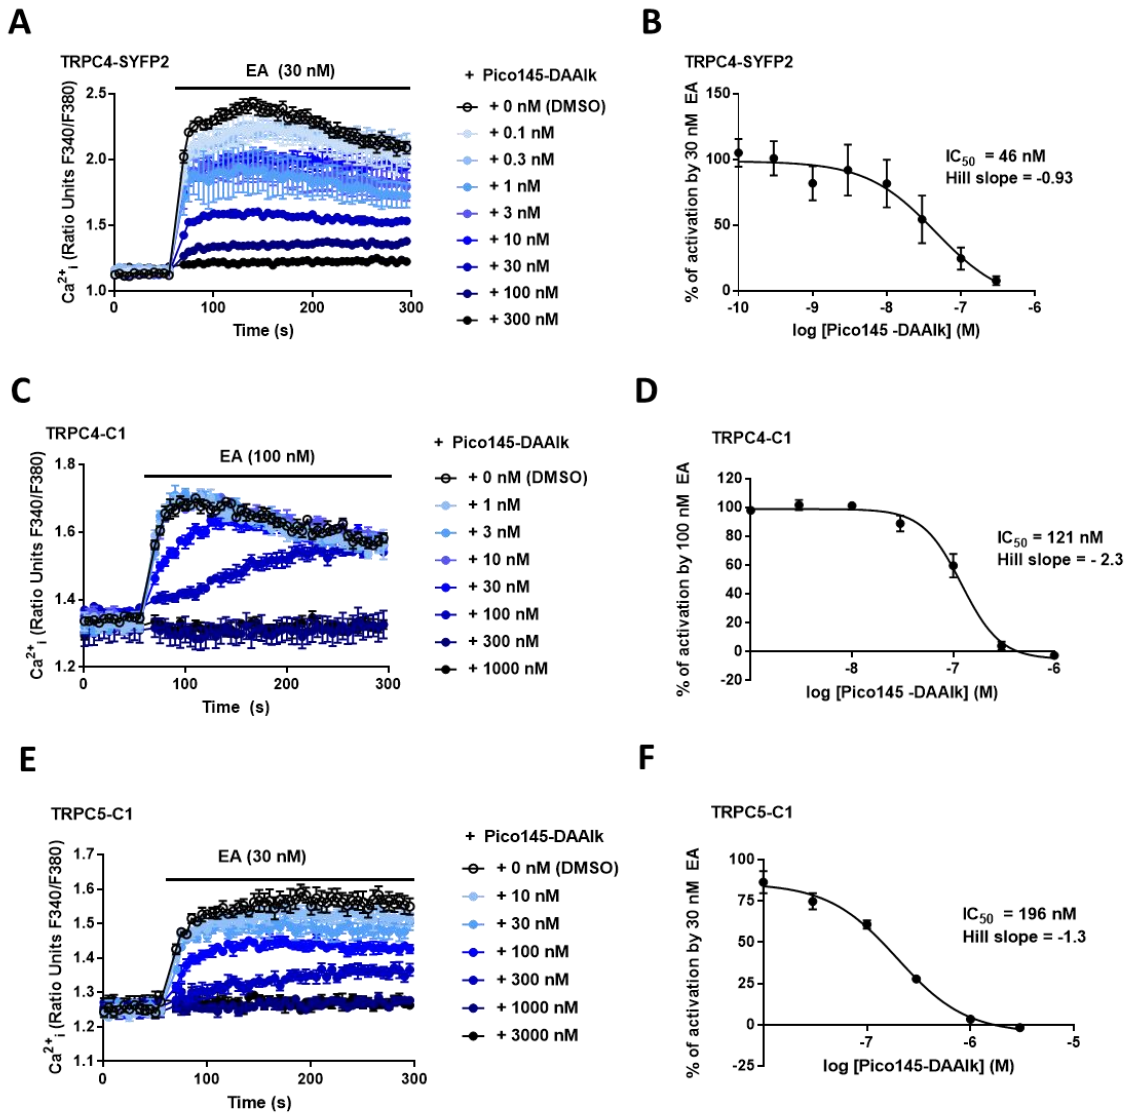

**Supplementary Figure 2.** Pico145-DAAIk 5 inhibits TRPC4-SYFP2, TRPC4-C1 and TRPC5-C1 channels. A,C,E) Representative traces from a single 96-well plate (N = 6) showing an inhibition of EA-mediated  $Ca^{2+}$  influx in response to 0.1-3000 nM Pico145-DAAIk 5 in HEK T-REx cells overexpressing TRPC4-SYFP2 (A), TRPC4-C1 (C) or TRPC5-C1 (E); B, D, F) Concentration-response data for experiments in (A), (C) and (E), showing mean responses  $\pm$  SEM (n/N = 3/18). Responses were calculated at 150-200 s, compared to baseline at 0-55 s.

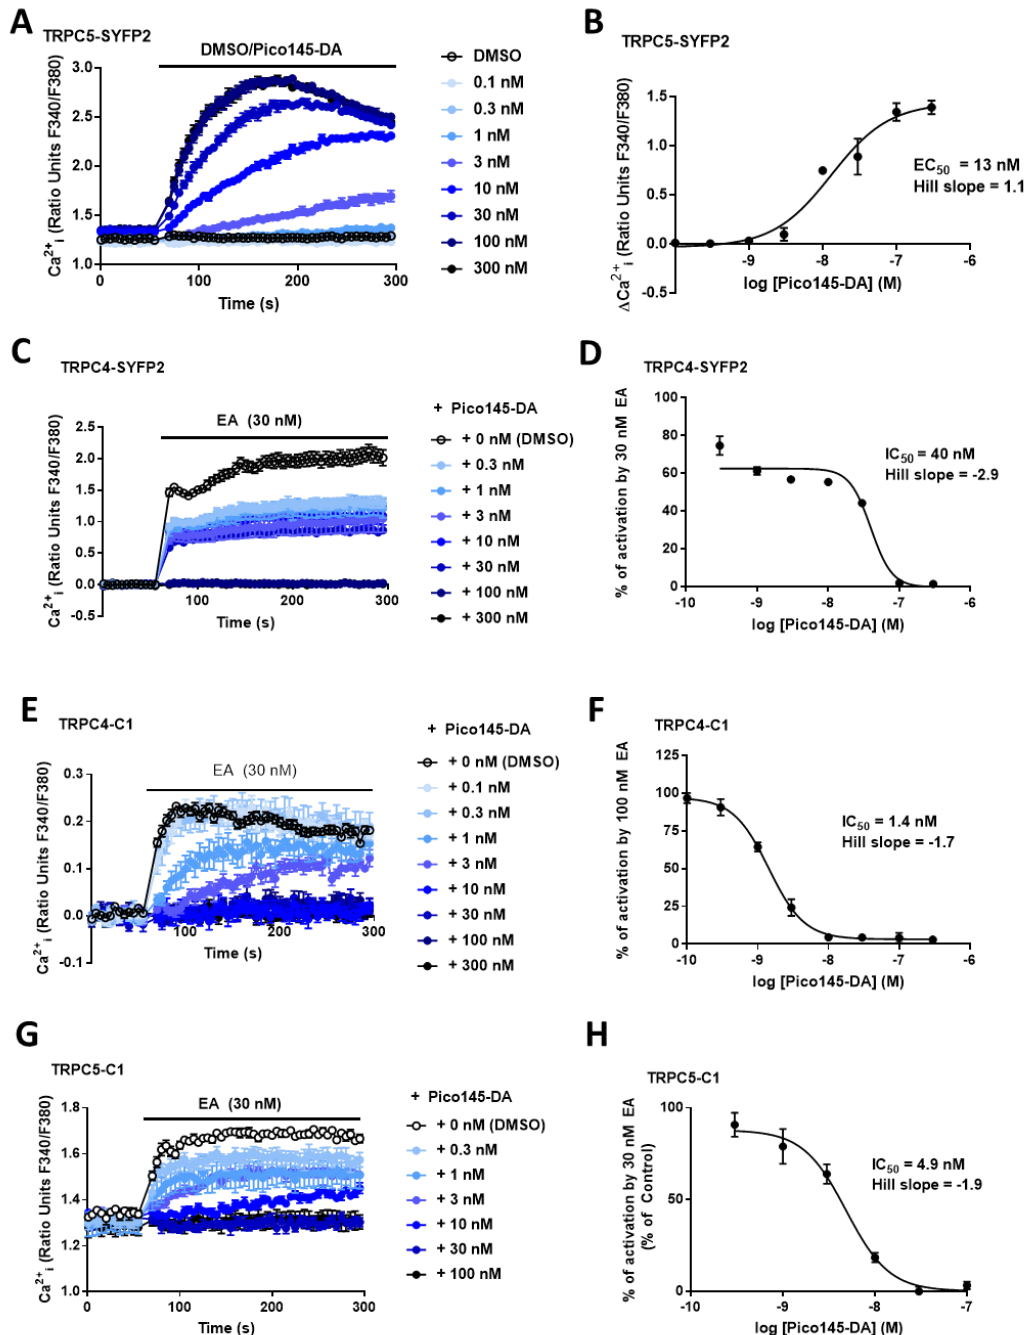

**Supplementary Figure 3.** Pico145-DA **4** activates TRPC5-SYFP2, and inhibits TRPC4-SYFP2, TRPC4-C1 and TRPC5-C1 channels. A) Representative traces from a single 96-well plate (N = 6) showing activation of Ca<sup>2+</sup> influx by 0.1-300 nM Pico145-DA **4** in HEK T-Rex cells overexpressing TRPC5-SYFP2. B) Concentration-response data for experiments in (A), showing mean responses ± SEM (n/N = 3/18). Responses were calculated at 150-200 s, compared to baseline at 0-55 s. C,E,G) Representative traces from a single 96-well plate (N = 6) showing an inhibition in EA-mediated Ca<sup>2+</sup> influx in response to 0.1 to 3000 nM Pico145-DA **4**, in HEK T-Rex cells overexpressing TRPC4-SYFP2 (C), TRPC4-C1 (E) or TRPC5-C1 (G); D, F, H) Concentration-response data for experiments in (A), (C) and (E), showing mean responses ± SEM (n/N = 3-4/18-24). Responses were calculated at 150-200 s, compared to baseline at 0-55 s.

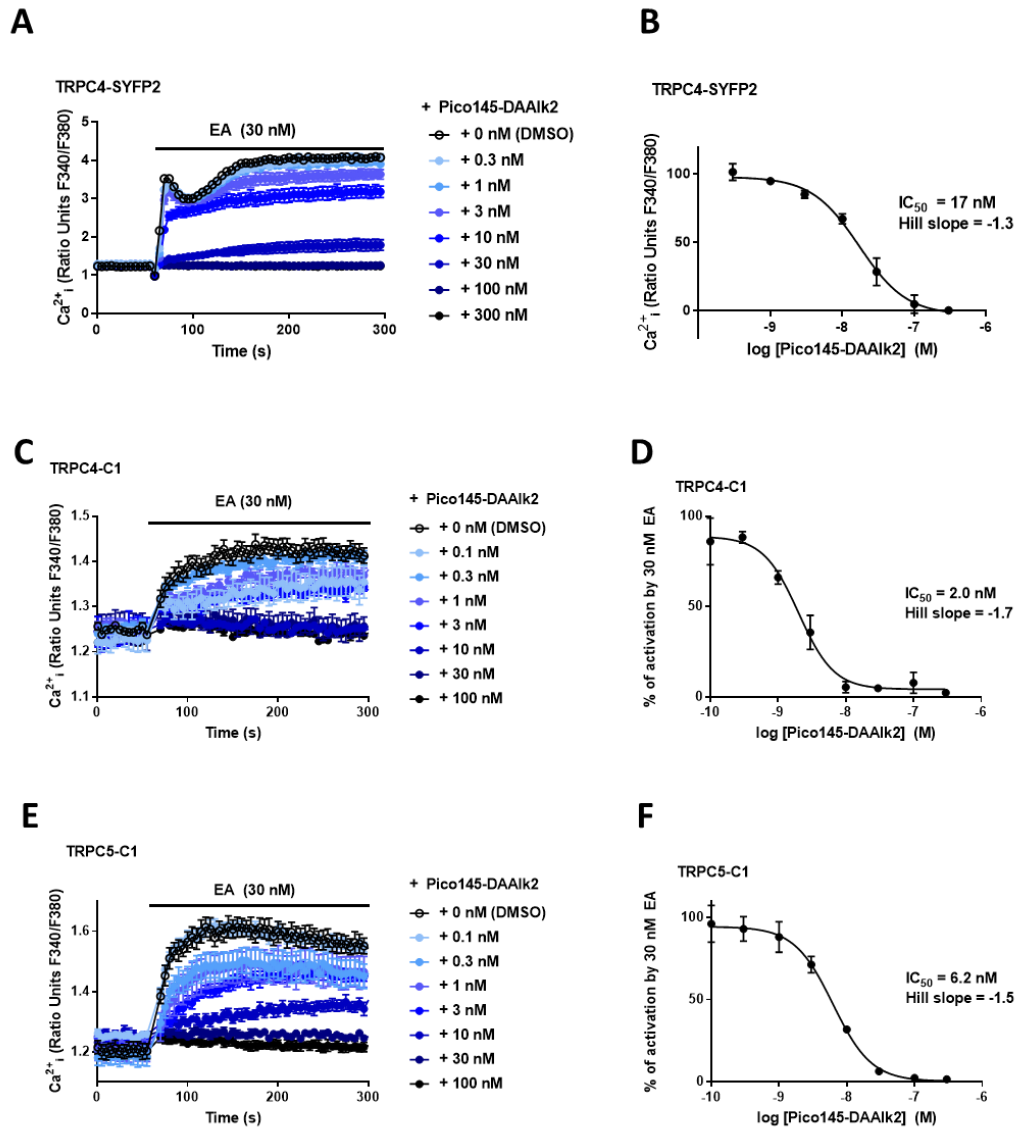

**Supplementary Figure 4.** Pico145-DAAIk2 **7** inhibits TRPC4-SYFP2, TRPC4-C1 and TRPC5-C1 channels. A,C,E) Representative traces from a single 96-well plate (N = 6) showing an inhibition in EA-mediated Ca<sup>2+</sup> influx in response to 0.1-300 nM Pico145-DAAIk2 **7** in HEK T-REx cells overexpressing TRPC4-SYFP2 (A), TRPC4-C1 (C) or TRPC5-C1 (E); B, D, F) Concentration-response data for experiments in (A), (C) and (E) showing mean responses ± SEM (n=1-3/N=6-18). Responses were calculated at 250-295 s, compared to baseline at 0-55 s.

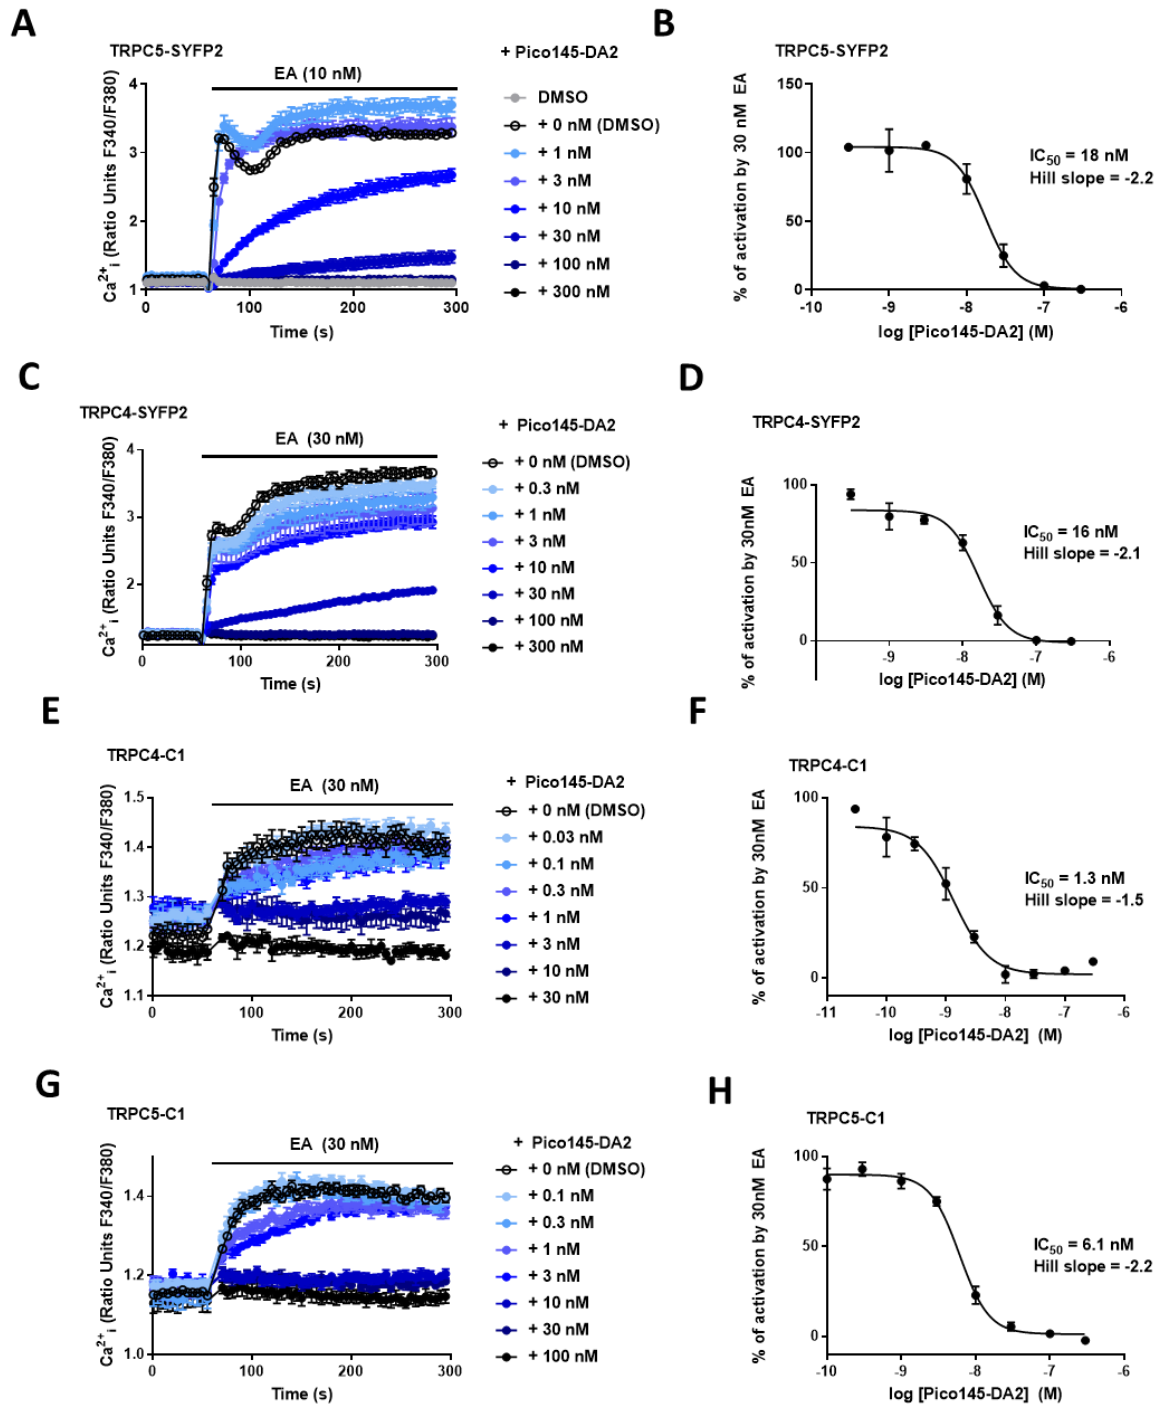

**Supplementary Figure 5.** Pico145-DA2 **6** inhibits TRPC5-SYFP2, TRPC4-SYFP2, TRPC4-C1 and TRPC5-C1 channels. A,C,E,G) Representative traces from a single 96-well plate (N = 6) showing an inhibition of EA-mediated Ca<sup>2+</sup> influx in response to 0.1-300 nM Pico145-DA2 **6** in HEK T-REx cells overexpressing TRPC5-SYFP2 (A), TRPC4-SYFP2 (C), TRPC4-C1 (E) or TRPC5-C1 (G); B, D, F, H) Concentration-response data for experiments in (A), (C), (E) and (H) showing mean responses ± SEM (n=1-3/N=6-18). Response was calculated at 250-295 s, compared to baseline at 0-55 s.

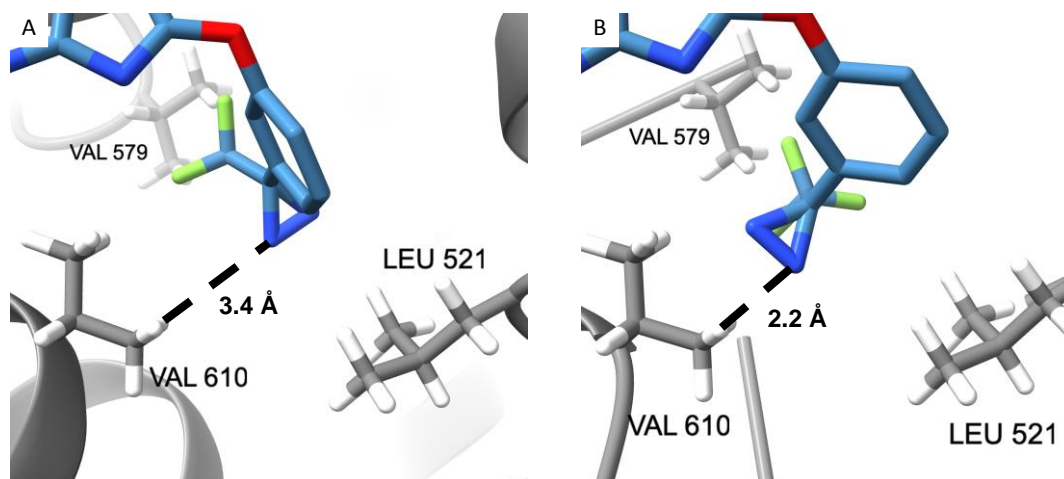

**Supplementary Figure 6.** Docking of Pico145-DA **4** suggest a requirement for its C-8 aryl substituent to twist in order to avoid clashes with nearby residues. A) Top-scoring docked pose of Pico145-DA **4** in TRPC5:C5 (PDB 6YSN; Pico145 ligand removed). The closest distance between the diazine of **4** and V610 was measured. B) Pico145 in TRPC5:C5 (PDB 6YSN) was manually modified in the maestro GUI to give Pico145-DA. The diazine group was minimised and the closest distance to V610 measured.

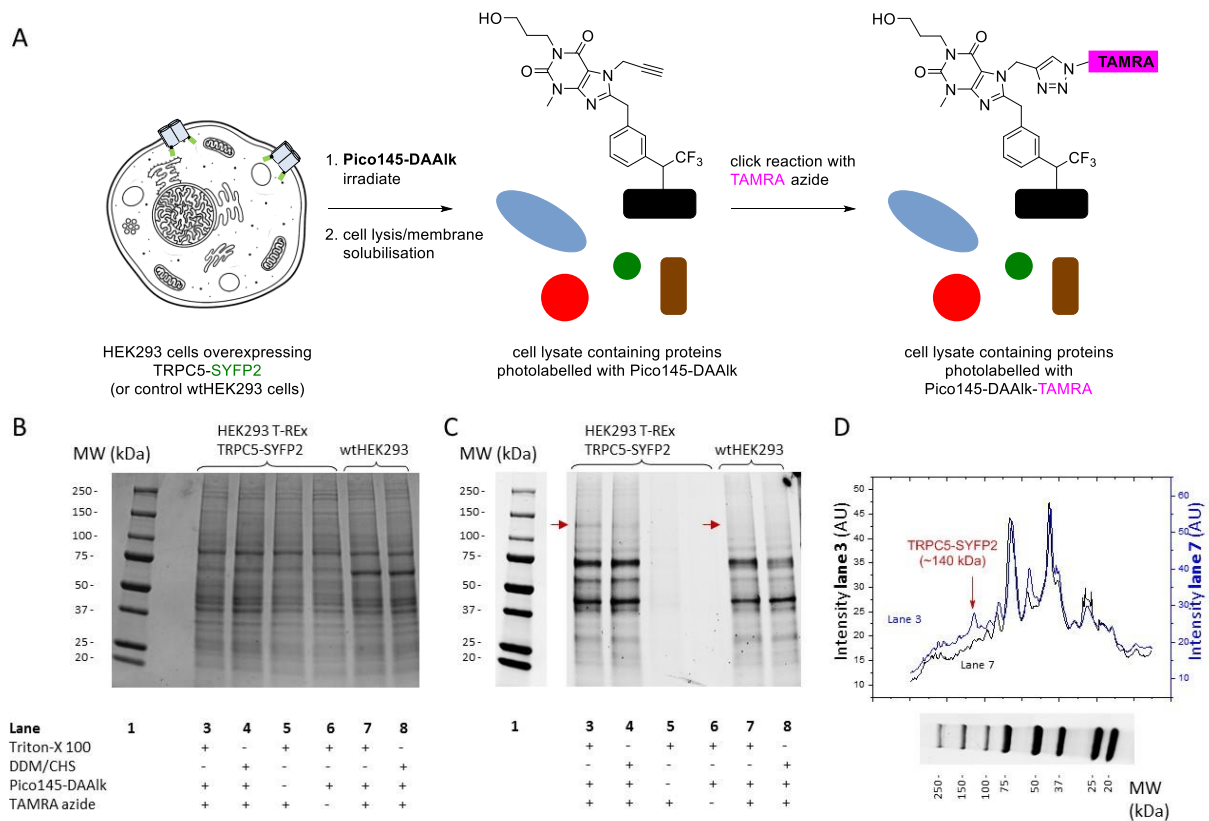

**Supplementary Figure 7.** Pico145-DAAlk 5 labels multiple proteins, including TRPC5-SYFP2, in HEK cells. A) HEK T-REx cells over-expressing TRPC5-SYFP2 (or wtHEK293 control cells) were incubated with Pico145-DAAlk 5 (300 nM, a large excess compared to the available TRPC5 in the HEK T-REx cells) and irradiated at 365 nm for 25 min using a UV crosslinker (Analytik Jena AG, Jena, Germany) at 0 °C for 25 minutes. Cells were washed, lysed (in lysis buffer with either Triton-X100 or DDM/CHS as detergents), and subjected to copper-catalysed alkyne-azide cycloaddition (click) reaction with TAMRA azide, resulting in TAMRA modification of proteins that had been photolabelled by Pico145-DAAlk. B) Coomassie Blue-stained SDS-PAGE gel analysis of cell lysates from PAL/click procedures. C) Fluorescent gel scan of SDS-PAGE gel shows TAMRA-labelled proteins only in samples that have been subjected to both Pico145-DAAlk/UV and click reaction with TAMRA azide (lanes 3, 4, 7 and 8, as compared to control lanes 5 and 6). The faint band at ~140 kDa is only present in TRPC5-SYFP2-expressing cells (lanes 3 and 4 vs lanes 7 and 8), suggesting a direct interaction between Pico145-DAAlk and TRPC5-SYFP2. The band is slightly more intense in lane 3 than in lane 4, suggesting that Triton-X100 is better at solubilising TRPC5-SYFP2 than the milder detergents DDM/CHS. D) Quantification of fluorescent bands in lanes 3 and 7 in the SDS-PAGE gel. Fiji was used for densitometry analysis of lanes, and intensity profiles were plotted (normalised to most intense peaks). See Supplementary Methods for additional details.

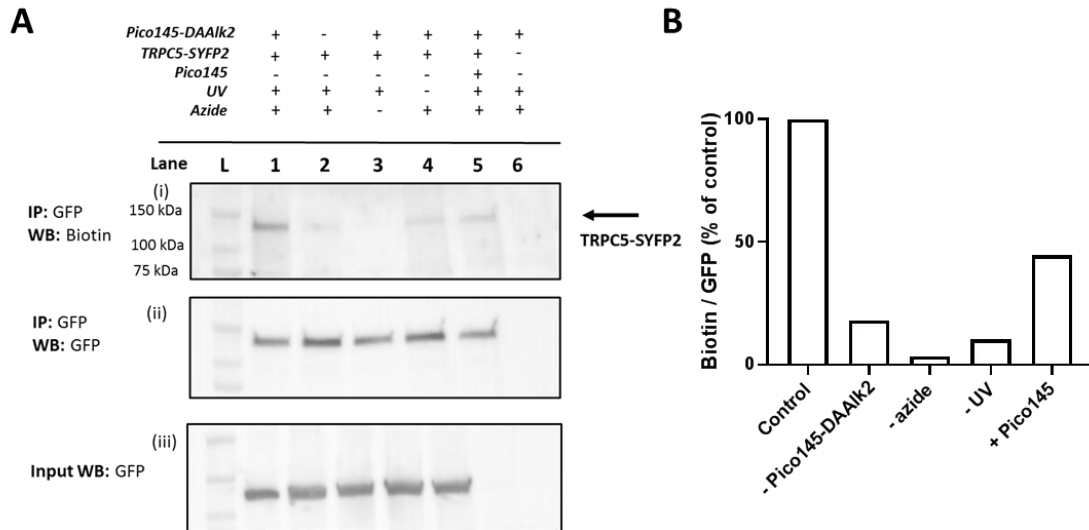

**Supplementary Figure 8.** Photoaffinity labelling of TRPC5 with Pico145-DAAIk2 **7**. A) Representative Western blot after experiment depicted in Figure 3, using Pico145-DAAIk **7** as the photoaffinity probe. Samples were blotted with Streptavidin-HRP (i) and anti-GFP (ii; loading control). Western blot with anti-GFP of input (pre-GFP trap) samples was performed to confirm successful TRPC5-SYFP2 expression in HEK T-REx cells (iii). The data show that photolabelling of TRPC5-SYFP2 in HEK T-REx cells (lane 1) is dependent on expression of TRPC5-SYFP2 (lane 6), treatment with Pico145-DAAIk2 **7** (300 nM, 30 min, 37 °C; lane 2), UV irradiation (365 nm, home-built LED photocrosslinker, 1 min; lane 4), and TAMRA-biotin azide (lane 3). In addition, Pico145 (100 nM) partially inhibits photoaffinity labelling with Pico145-DAAIk2, **7** (lane 5). Lane L indicates protein molecular weight ladder. B) Densitometry analysis of data presented in (A).



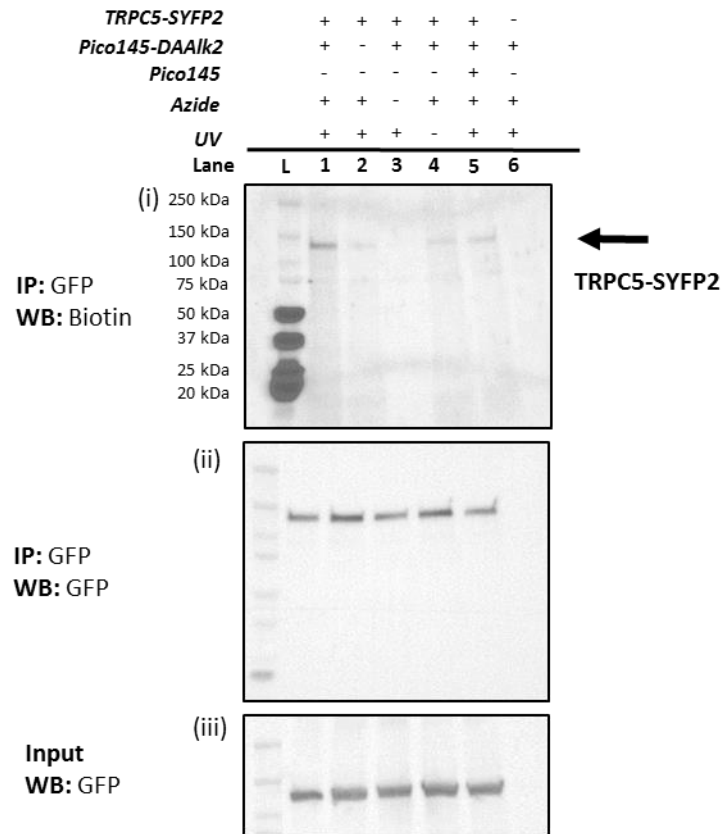

**Supplementary Figure 9.** Full Western blots for experiments shown in Supplementary Figure 6.

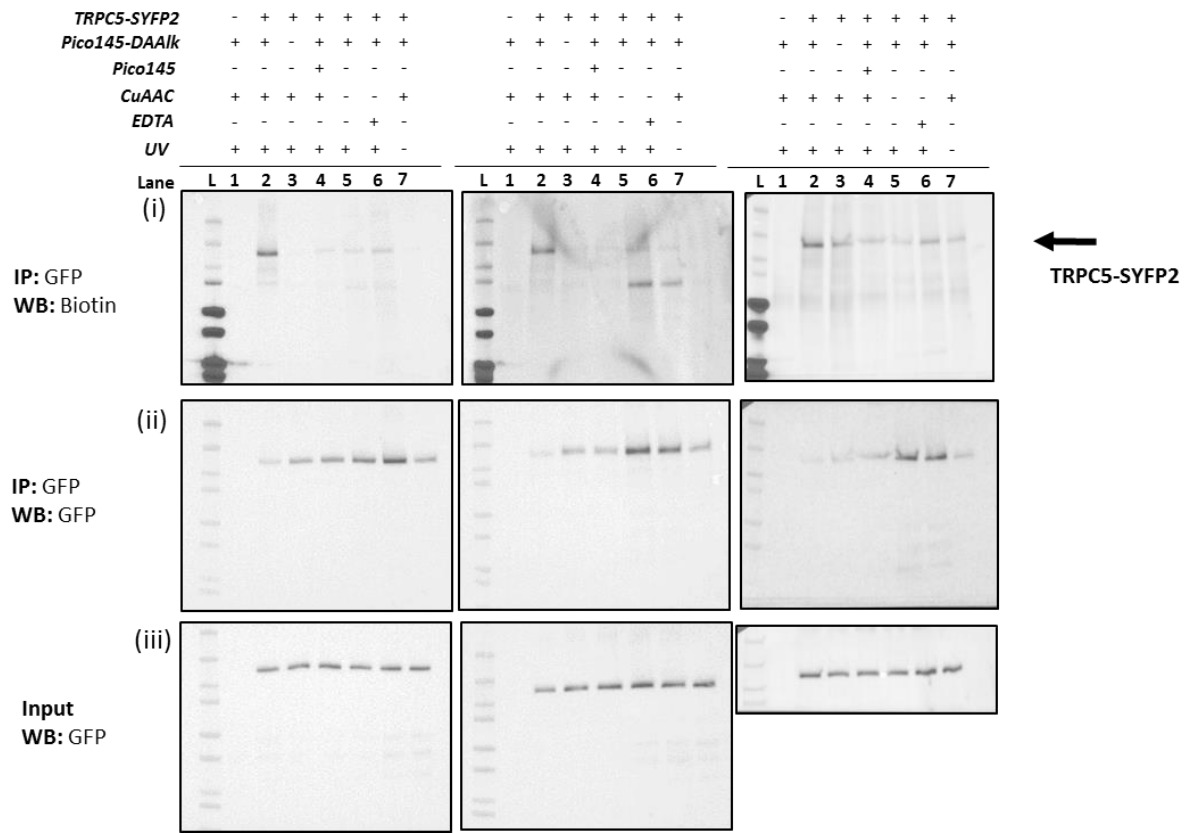

Supplementary Figure 10. Full Western blots for experiments shown in Figure 4.

**A**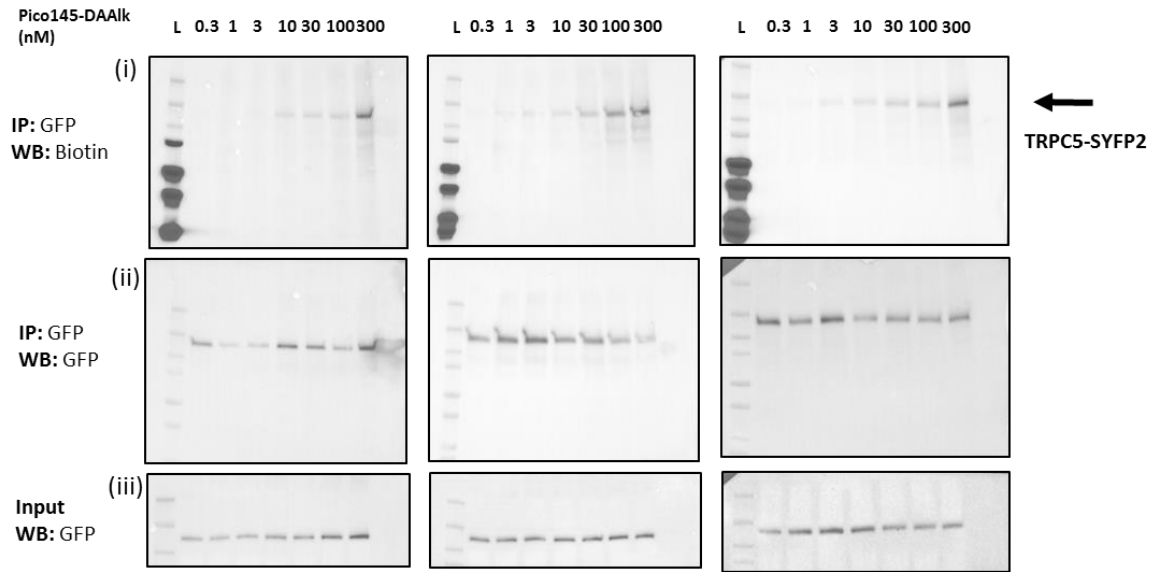**B**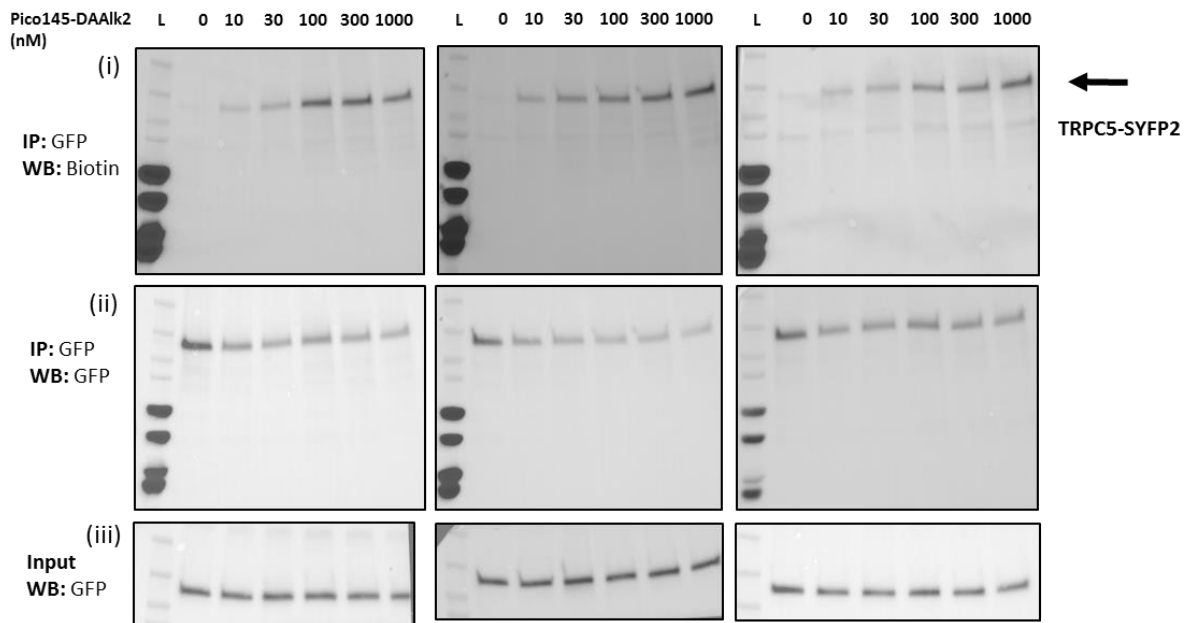

**Supplementary Figure 11.** Full Western blots for experiments shown in Figure 5. A) data for Pico145-DAAlk 5; B) data for Pico145-DAAlk 7.

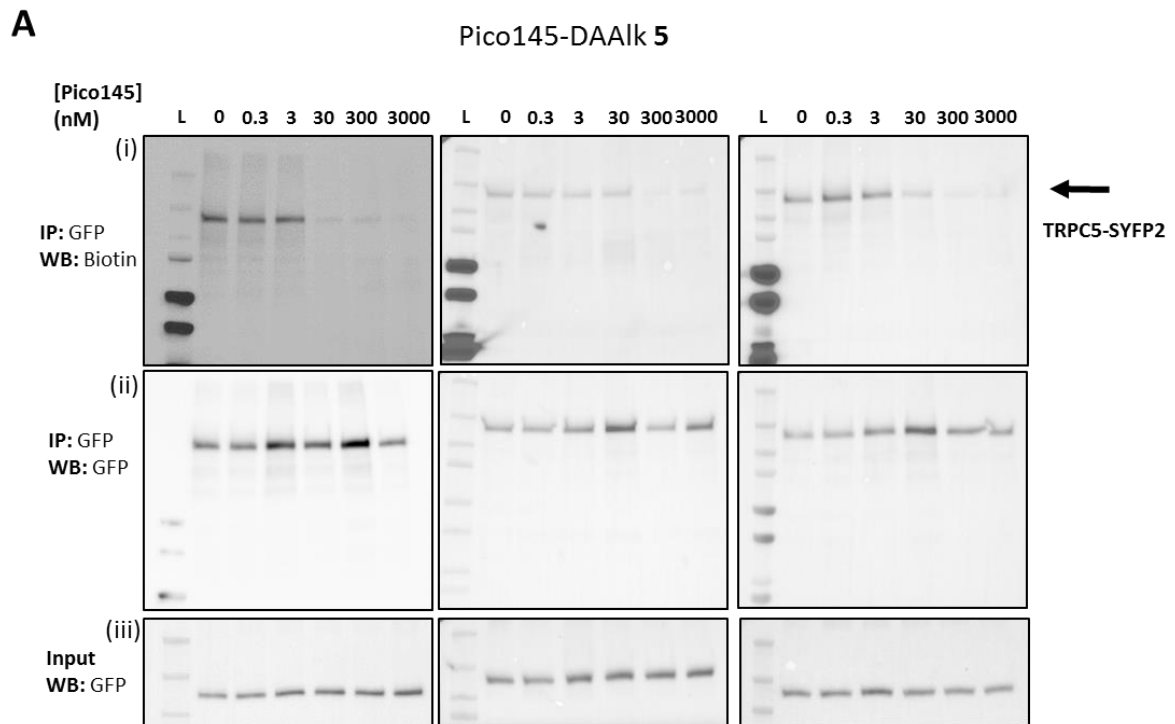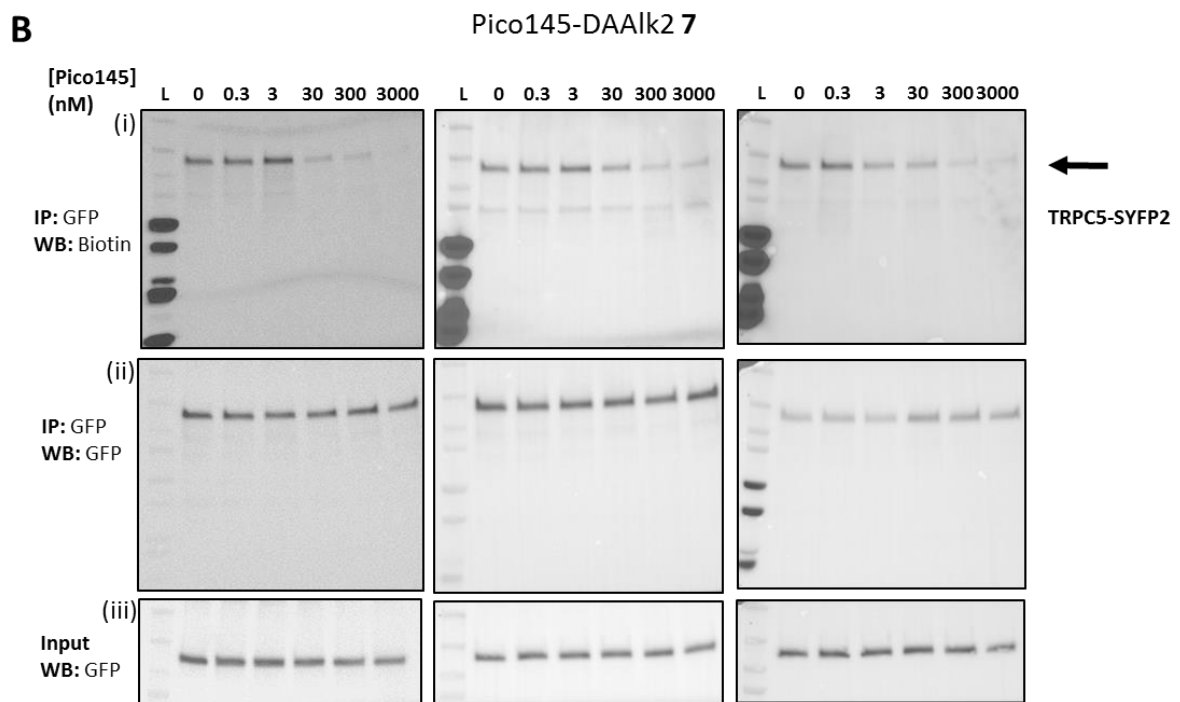

**Supplementary Figure 12.** Full western blots for experiments in Figure 6. A) data for Pico145-DAAlk 5; B) data for Pico145-DAAlk 7.

## Supplementary Tables

**Supplementary Table 1.** Calculated solubilities of TRPC5 modulators and photoaffinity probes.

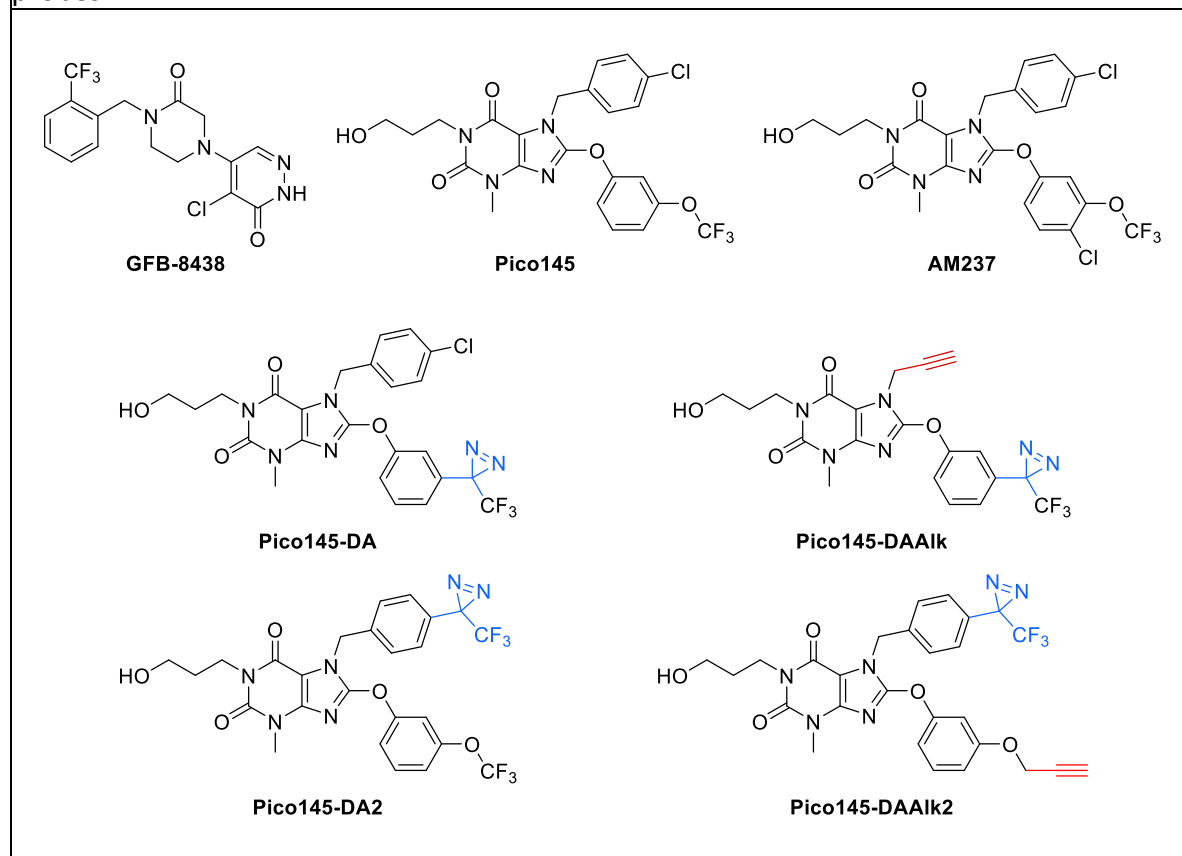

| compound ID              | GFB-8438 | Pico145 | AM237  | Pico145-DA | Pico145-DAAIk | Pico145-DA-2 | Pico145-DAAIk-2 |
|--------------------------|----------|---------|--------|------------|---------------|--------------|-----------------|
| <b>cLogS<sup>a</sup></b> | -3.737   | -7.216  | -7.743 | -7.051     | -5.237        | -7.839       | -7.265          |
| <b>cLogP<sup>b</sup></b> | 2.072    | 5.454   | 5.834  | 4.630      | 3.054         | 5.147        | 4.719           |

<sup>a</sup> cLog S = log<sub>10</sub> of calculated aqueous solubility in mol/L; <sup>b</sup> cLogP = log<sub>10</sub> of calculated partition coefficient between n-octanol and water. Calculations were performed using QikProp v6.2 (rel 12) (Schrödinger) as described in the Methods.

## Supplementary Methods

### Initial photoaffinity labelling experiment (Supplementary Figure 7)

HEK-293 T-REx cells expressing inducible TRPC5-SYFP2 were plated onto poly-D-lysine coated 6-well plates (Corning™ Costar™) and 1  $\mu\text{g}\cdot\text{ml}^{-1}$  tetracycline (tet+) was applied 18 h prior to experimentation to induce TRPC5-SYFP2 expression. WT HEK293 cells were used as a control for no expression of TRPC5. To treat cells for photoaffinity labelling, medium was removed and cells were washed once in DPBS. SBS containing 300 nM Pico145-DAAIk 5 or DMSO was then added to the cells, and cells were incubated at 37 °C for 5 min. Plates were placed on ice and irradiated at 365 nm for 25 minutes (UVP-Crosslinker cl-1000). Cells were washed with DPBS and lysed with Triton-X100 (1 x PBS, 0.1% SDS, 1% TritonX-100, 1 EDTA-free protease inhibitor cocktail (Thermo Scientific)) or DDM-CHS (1% DDM, 0.1% CHS, 100 nM NaCl, 20 mM Tris pH 7.5, EDTA free protease inhibitor cocktail) lysis buffer. The cells were transferred with gentle scraping to an Eppendorf and incubated in the lysis buffer at 4 °C for 1 h under constant mixing. Cell lysates were centrifuged at 10,000  $\times g$  for 10 min at 4 °C in order to pellet large debris. The supernatant was transferred to a fresh tube and protein concentration measured using DC protein quantification. Lysate concentration was adjusted to 1  $\text{mg}\cdot\text{ml}^{-1}$ . CuAAC reagents were premixed in the following order and added to the lysate (50  $\mu\text{g}$ ) at the indicated final concentrations: 100  $\mu\text{M}$  Fluor-Azide-545 (Sigma-Aldrich), 1 mM  $\text{CuSO}_4$ , 1 mM TCEP and 100  $\mu\text{M}$  TBTA. Samples were incubated for 1 h with gentle agitation, at room temperature. Following CuAAC, EDTA was added to a final concentration of 10 mM and proteins were precipitated with ice-cold acetone (4 volumes) at -20 °C overnight, centrifuged at 16,000  $\times g$ , 10 min, 4 °C and the pellet washed twice with ice-cold MeOH. Proteins were resuspended in equal volumes of 2% SDS in PBS and 2 $\times$  SDS sample loading buffer (SLB: 4% SDS, 20% glycerol, 10% 2-mercaptoethanol, 0.004% bromophenol blue and 0.125 M Tris HCl, pH 6.8) by vortexing. The lysates were separated by SDS-PAGE gel using 4-20% pre-cast gels (Mini-PROTEAN TGX, Bio-Rad) and Precision Plus Protein™ All Blue Prestained Protein Standards (Bio-Rad) were used as a molecular weight marker. Fluorescently modified proteins were analysed using a Molecular Imager ChemiDoc XRS System (Bio-Rad). After obtaining the fluorescence image, the same gel was stained with Coomassie Brilliant Blue (CBB, Bio-Rad) and visualised on a Molecular Imager ChemiDoc XRS System. Densitometric quantification of the fluorescent bands was performed using Fiji.<sup>2</sup> Intensity profiles were normalised to most intense peaks before plotting).

### General synthetic methods

All chemical reagents were purchased from commercial suppliers and used without further purification. Anhydrous solvents and liquid reagents were purchased in Sure/Seal™ bottles. Flash column chromatography was carried out using silica (Merck Geduran silica gel, 35-70  $\mu\text{m}$  particles). Thin layer chromatography was carried out on commercially available pre-coated aluminium plates (Merck silica 2 8 8 0 Kieselgel 60 F254). Analytical HPLC was performed on an Agilent 1290 Infinity Series equipped with a UV detector (set at 254 nm) and a Hyperclone C18 reverse phase column using MeCN/water (5 $\rightarrow$ 95% or 50 $\rightarrow$ 95%) containing 0.1% formic acid, at 0.5  $\text{mL}\cdot\text{min}^{-1}$  over a period of five minutes. High resolution electrospray

(ESI+) mass spectrometry was performed on a Bruker MaXis Impact QTOF mass spectrometer, and  $m/z$  values are reported in Daltons to four decimal places.  $^1\text{H}$ ,  $^{13}\text{C}$  and  $^{19}\text{F}$  NMR spectra were recorded in deuterated solvents on a Bruker Avance 500 or Bruker Avance 400. Chemical shifts for  $^1\text{H}$  and  $^{13}\text{C}$  NMR are quoted in parts per million downfield of tetramethylsilane and referenced to residual solvent peaks ( $\text{CDCl}_3$ :  $^1\text{H}$  = 7.26 ppm,  $^{13}\text{C}$  = 77.16 ppm) and coupling constants ( $J$ ) are reported to the nearest 0.1 Hz. The following abbreviations are used: s, singlet; d, doublet; t, triplet, q, quartet; m, multiplet. Chemical shifts for  $^{19}\text{F}$  NMR are referenced to an external standard of trichlorofluoromethane at 0 ppm.

### Synthesis of diazirine building block 13

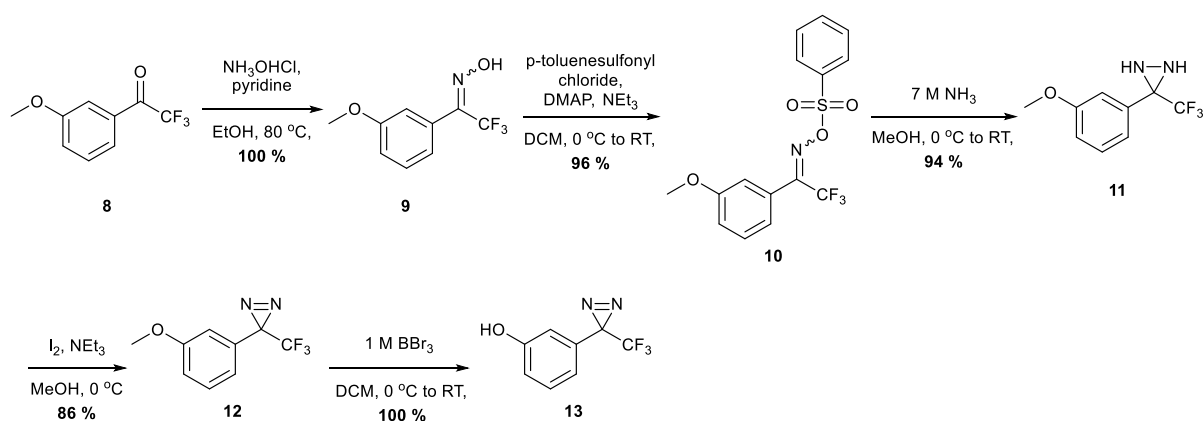

**Supplementary Figure 13.** Synthetic route to diazirine building block 13.

#### N-[2,2,2-trifluoro-1-(3-methoxyphenyl)ethylidene]hydroxylamine **9**<sup>3</sup>

Hydroxylamine hydrochloride (340 mg, 4.90 mmol) was added to a stirred solution of 3'-methoxy-2,2,2-trifluoroacetophenone **8** (500 mg, 2.45 mmol) in anhydrous EtOH (8 mL) and anhydrous pyridine (2 mL). The reaction mixture was stirred while heating under reflux for 18 h, after which the mixture was allowed to cool to room temperature and the solvents were evaporated *in vacuo*. The residue was dissolved in Et<sub>2</sub>O (30 mL), washed with water (2 × 20 mL), dried (MgSO<sub>4</sub>) and concentrated *in vacuo*, to yield a pale orange oil (537 mg, quantitative).  $\delta\text{H}$  (500 MHz,  $\text{CDCl}_3$ ) 7.39 (app. t,  $J$  8.0 Hz, 1H), 7.10 (ddd,  $J$  8.0, 1.9, 0.8, 1H), 7.07 (app. t,  $J$  1.9, 1H), 7.00 (ddd,  $J$  8.0, 1.9, 0.8, 1H), 3.83 (s, 3H);  $\delta\text{C}$  (125 MHz,  $\text{CDCl}_3$ ) 159.6, 129.6, 128.6, 121.2 (q,  $J$  274.3, CF<sub>3</sub>), 120.9, 115.9, 114.3, 55.3, C=N-OH not observed;  $\delta\text{F}$  (235 MHz,  $\text{CDCl}_3$ ) -66.5. Data consistent with literature.<sup>3</sup>

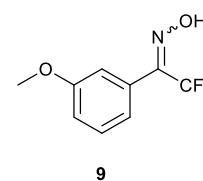

**[2,2,2-trifluoro-1-(3-methoxyphenyl)ethylidene]amino**

**4-methylbenzene-1-sulfonate 10**<sup>3</sup> *p*-Toluenesulfonyl chloride (3.83 g, 20.1 mmol) was added to a solution of N-[2,2,2-trifluoro-1-(3-methoxyphenyl)ethylidene]hydroxylamine **9** (3.00 g, 14.7 mmol), DMAP (118 mg, 0.97 mmol) and anhydrous triethylamine (2.25 mL, 22.1 mmol) in DCM (70 mL) at 0 °C. The mixture was stirred for 3 h, while it was allowed to warm to room temperature, and then stirred for a further 16 h. The reaction mixture was washed with water (3 × 100 mL), dried (Na<sub>2</sub>SO<sub>4</sub>) and concentrated *in vacuo*. The crude material was purified by column chromatography (SiO<sub>2</sub>; hexane-DCM 7:3) to yield the product as a pale yellow solid (5.02 g, 96%). R<sub>f</sub> 0.2 (3:7 DCM:hexane); δH (400 MHz, CDCl<sub>3</sub>) 7.81 (d, *J* 8.3 Hz, 2H), 7.35-7.26 (m, 3H), 6.98 (dd, *J* 8.3, 2.0, 1H), 6.83 (app. d, *J* 8.3, 1H), 6.81 (t, *J* 2.0, 1H), 3.75 (s, 3H), 2.41 (s, 3H); δC (100 MHz, CDCl<sub>3</sub>) 159.7, 154.1 (app. d, *J* 33.7), 146.3, 131.4, 130.2, 130.0, 129.4, 125.8, 120.7, 119.0 (q, *J* 277.7, CF<sub>3</sub>), 117.4, 114.1, 55.6, 22.0; δF (235 MHz, CDCl<sub>3</sub>) -66.9; ESI-HRMS: calcd. for C<sub>16</sub>H<sub>14</sub>F<sub>3</sub>NO<sub>4</sub>SNa [M+Na]<sup>+</sup> 396.0488, found 396.0482. Data consistent with literature.<sup>3</sup>

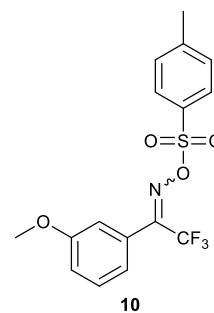**3-(3-methoxyphenyl)-3-(trifluoromethyl)diaziridine 11**<sup>4</sup> [2,2,2-trifluoro-1-(3-methoxyphenyl)ethylidene]amino-4-methylbenzene-1-sulfonate **10**

(1.60 g, 4.55 mmol) was dissolved in a 7 M solution of ammonia in methanol (15 mL) at 0 °C under a gaseous ammonia atmosphere. The reaction mixture was stirred vigorously to dissolve **10**, whilst bubbling ammonia through the solution. The reaction mixture was allowed to warm to room temperature after 6 h and stirred for a further 16 h at room temperature. The reaction was left open to allow the ammonia to evaporate, aqueous sodium bicarbonate (sat., 2 mL) was added to the mixture and a white precipitate formed. The white precipitate was filtered off and the crude product was extracted with DCM (30 mL) and concentrated *in vacuo*. The crude material was purified by column chromatography (SiO<sub>2</sub>; hexane-EtOAc 85:15) to give the title compound as a colourless oil (860 mg, 94%). R<sub>f</sub> 0.4 (DCM-hexane 9:1); δH (400 MHz, CDCl<sub>3</sub>) 7.34 (app. t, *J* 8.0 Hz, 1H), 7.20 (ddd, *J* 8.0, 2.1, 0.9, 1H), 7.15 (app. t, *J* 2.1, 1H), 6.98 (ddd, *J* 8.0, 2.1, 0.9, 1H), 3.83 (s, 3H), 2.79 (d, *J* 8.8, 1H), 2.26 (d, *J* 8.8, 1H); δC (100 MHz, CDCl<sub>3</sub>) 159.7, 133.0, 129.9, 123.5 (q, *J* 278.4, CF<sub>3</sub>), 120.3, 115.8, 113.6, 58.0 (q, *J* 36.1, C-diaziridine), 55.4; δF (235 MHz, CDCl<sub>3</sub>) -75.5; ESI-HRMS: calcd. for C<sub>9</sub>H<sub>10</sub>F<sub>3</sub>N<sub>2</sub>O [M+H]<sup>+</sup> 219.0740, found 219.0675. Data consistent with literature.<sup>4</sup>

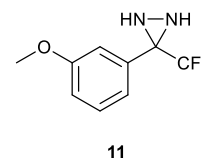**3-(3-methoxyphenyl)-3-(trifluoromethyl)-3H-diazirine 12**<sup>5</sup> 3-(3-methoxyphenyl)-3-(trifluoromethyl)diaziridine **11**

(1.60 g, 7.30 mmol) was dissolved in MeOH (10 mL) and stirred at 0 °C for 5 min. Triethylamine (1.50 mL, 11.0 mmol) was added to the reaction mixture and stirring continued for 5 min. Small portions of iodine (2.22 g in total, 8.76 mmol) were added until a deep red colour persisted. EtOAc (5 mL) was added to the solution and the mixture was washed with 1 M HCl (15 mL), aqueous sodium thiosulfate (10% w/w, 3 × 10 mL or until solution turned colourless) and brine (15 mL), dried (Na<sub>2</sub>SO<sub>4</sub>) and concentrated *in vacuo* to yield the title compound as a pale yellow oil (1.35 g, 86 %). R<sub>f</sub> 0.1 (hexane-EtOAc 9:1); δH (500 MHz, CDCl<sub>3</sub>)

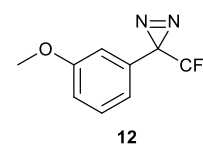



7.31 (app. t, *J* 8.1 Hz, 1H), 6.95 (dd, *J* 8.1, 2.1, 1H), 6.78 (app d, *J* 8.1, 1H), 6.70 (d, *J* 2.1, 1H), 3.81 (s, 3H);  $\delta$ C (125 MHz, CDCl<sub>3</sub>) 159.9, 130.7, 129.9, 122.5 (q, *J* 274.6, CF<sub>3</sub>), 118.9, 115.4, 112.4, 55.5, 28.6 (q, *J* 36.1, C-diazirine);  $\delta$ F (235 MHz, CDCl<sub>3</sub>) -65.2; ESI-HRMS: calcd. for C<sub>9</sub>H<sub>8</sub>F<sub>3</sub>N<sub>2</sub>O [M+H]<sup>+</sup> 217.0583, found 217.0599. Data consistent with literature.<sup>5</sup>

**3-[3-(trifluoromethyl)-3H-diazirin-3-yl]phenol **13****<sup>6</sup> BBr<sub>3</sub> (1.0 M in DCM, 7.40 mL, 7.40 mmol) was added dropwise to a solution of 3-(3-methoxyphenyl)-3-(trifluoromethyl)-3H-diazirine **12** (0.82 g, 3.70 mmol) in DCM (10 mL) over 5 min at 0 °C. The reaction mixture was stirred for 2 h at 0 °C, then allowed to warm to room temperature and stirred for a further 12 h. Water (15 mL) was added to the mixture and the organic compounds were extracted with diethyl ether (3 × 20 mL). The combined organic layers were washed with water (3 × 20 mL) and brine (20 mL), and the ethereal layer was dried (Na<sub>2</sub>SO<sub>4</sub>) and concentrated *in vacuo* to yield the title compound as a brown oil (754 mg, quantitative). R<sub>f</sub> 0.2 (hexane-EtOAc 9:1);  $\delta$ H (500 MHz, CDCl<sub>3</sub>) 7.26 (t, *J* 8.0 Hz, 1H), 6.88 (dd, *J* 8.0, 2.1, 1H), 6.73 (dd, *J* 8.0, 2.1, 1H), 6.67 (t, *J* 2.1, 1H);  $\delta$ C (125 MHz, CDCl<sub>3</sub>)  $\delta$  155.9, 131.0, 130.4, 122.2 (d, *J* 274.9, CF<sub>3</sub>), 120.8, 118.1, 113.7, 28.4 (q, *J* 40.4, C-diazirine);  $\delta$ F (235 MHz, CDCl<sub>3</sub>) -71.6; ESI-HRMS could not be obtained. Data consistent with literature.<sup>6</sup>

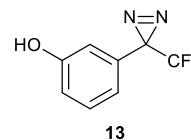

## Synthesis of Pico145-DA **4**

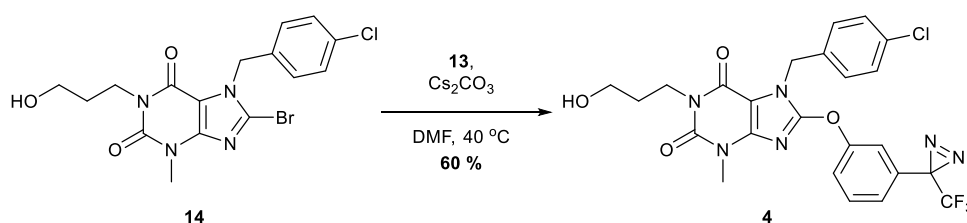

**Supplementary Figure 14.** Synthetic route to photoaffinity probe, Pico145-DA, **4**.

## 7-[(4-chlorophenyl)methyl]-1-(3-hydroxypropyl)-3-methyl-8-{3-[3-(trifluoromethyl)-3H-diazirin-3-yl]phenoxy}-2,3,6,7-tetrahydro-1H-purine-2,6-dione (Pico145-DA) **4**

Cs<sub>2</sub>CO<sub>3</sub> (286 mg, 0.81 mmol) was added to a solution of 8-bromo-7-[(4-chlorophenyl)methyl]-1-(3-hydroxypropyl)-3-methyl-2,3,6,7-tetrahydro-1H-purine-2,6-dione, **14** (prepared as described in Rubaiy et al., 2017)<sup>7</sup> (289 mg, 0.67 mmol) in DMF (6 mL). After 5 min, 3-[3-(trifluoromethyl)-3H-diazirin-3-yl]phenol **13** (150 mg, 0.74 mmol) was added to the reaction mixture, and the reaction mixture was heated to 40 °C for 1 h. The mixture was cooled, partitioned between EtOAc (10 mL) and water (10 mL). The organics were washed with aqueous LiCl (1 N, 3 × 10 mL), dried (Na<sub>2</sub>SO<sub>4</sub>) and concentrated *in vacuo* to yield the title compound (220 mg, 60 %). R<sub>f</sub> 0.2 (7:3 EtOAc:hexane);  $\delta$ H (400 MHz, CDCl<sub>3</sub>) 7.46 (t, *J* 8.1 Hz, 1H), 7.40 (d, *J* 8.4, 2H), 7.35 – 7.30 (m, 3H), 7.20 (s, 1H), 7.08 (d, *J* 7.8, 1H), 5.42 (s, 2H), 4.19 (dd, *J* 13.4, 7.4, 2H), 3.52 (d, *J* 4.9, 2H), 3.44 (s, 3H), 1.90 (dd, *J* 10.9, 5.1, 2H);  $\delta$ C (101 MHz, CDCl<sub>3</sub>) 155.4, 153.3, 153.1, 151.8, 146.4, 134.7, 134.3, 131.4, 130.6, 129.9, 129.3, 124.0, 122.0 (q, *J* 274.8, CF<sub>3</sub>), 121.2, 118.3, 103.1, 58.7, 46.8, 37.9, 31.0, 30.1, 28.4 (q, *J* 40.6, C-

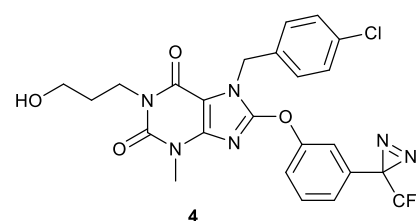

diazirine);  $\delta_F$  (235 MHz,  $CDCl_3$ ) -65.1; ESI-HRMS: calcd. for  $C_{24}H_{21}ClF_3N_6O_4$   $[M+H]^+$  549.1259, found 549.1266; HPLC: RT = 1.93 min.

AM213 wash  
Name - Aisling  
Room No. - G39f  
Sample - AM213 wash

$^1\text{H}$  NMR (400 MHz,  $\text{CDCl}_3$ )  $\delta$  7.46 (t,  $J = 8.1$  Hz, 1H), 7.40 (d,  $J = 8.4$  Hz, 2H), 7.35 – 7.30 (m, 3H), 7.20 (s, 1H), 7.08 (d,  $J = 7.8$  Hz, 1H), 5.42 (s, 2H), 4.19 (dd,  $J = 13.4, 7.4$  Hz, 2H), 3.52 (d,  $J = 4.9$  Hz, 2H), 3.44 (s, 3H), 1.90 (dd,  $J = 10.9, 5.1$  Hz, 2H).

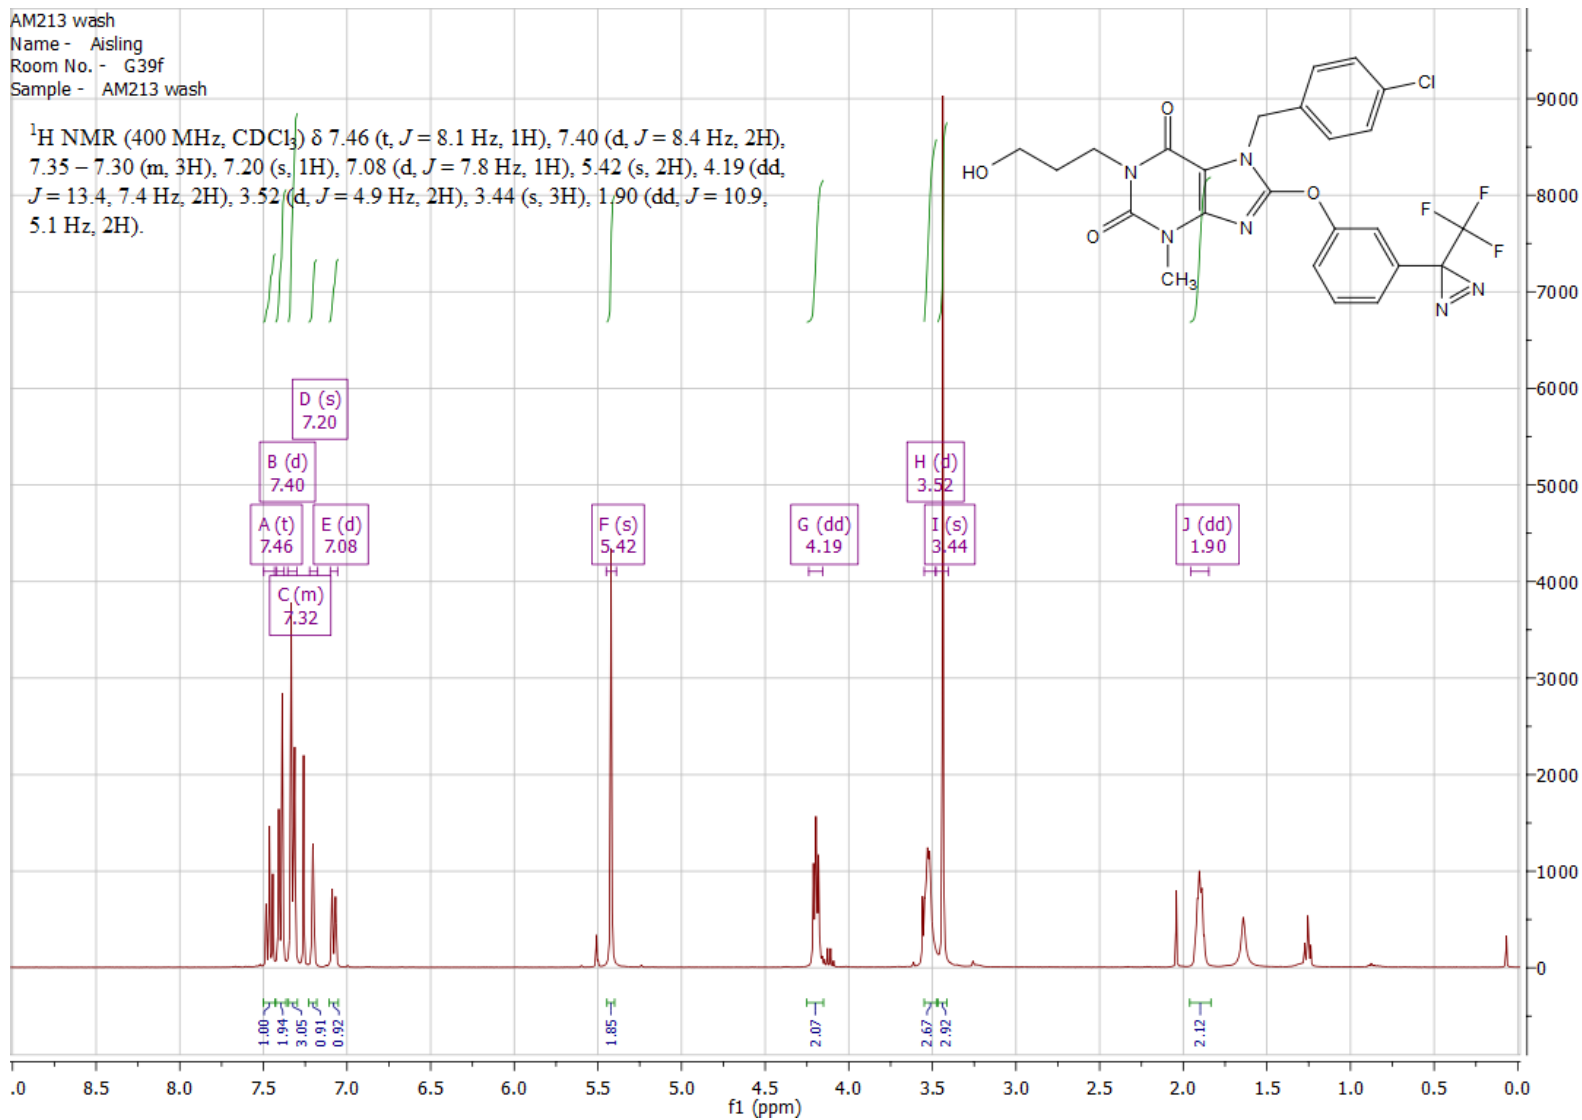

Supplementary Figure 15.  $^1\text{H}$  NMR spectrum of Pico145-DA 4.

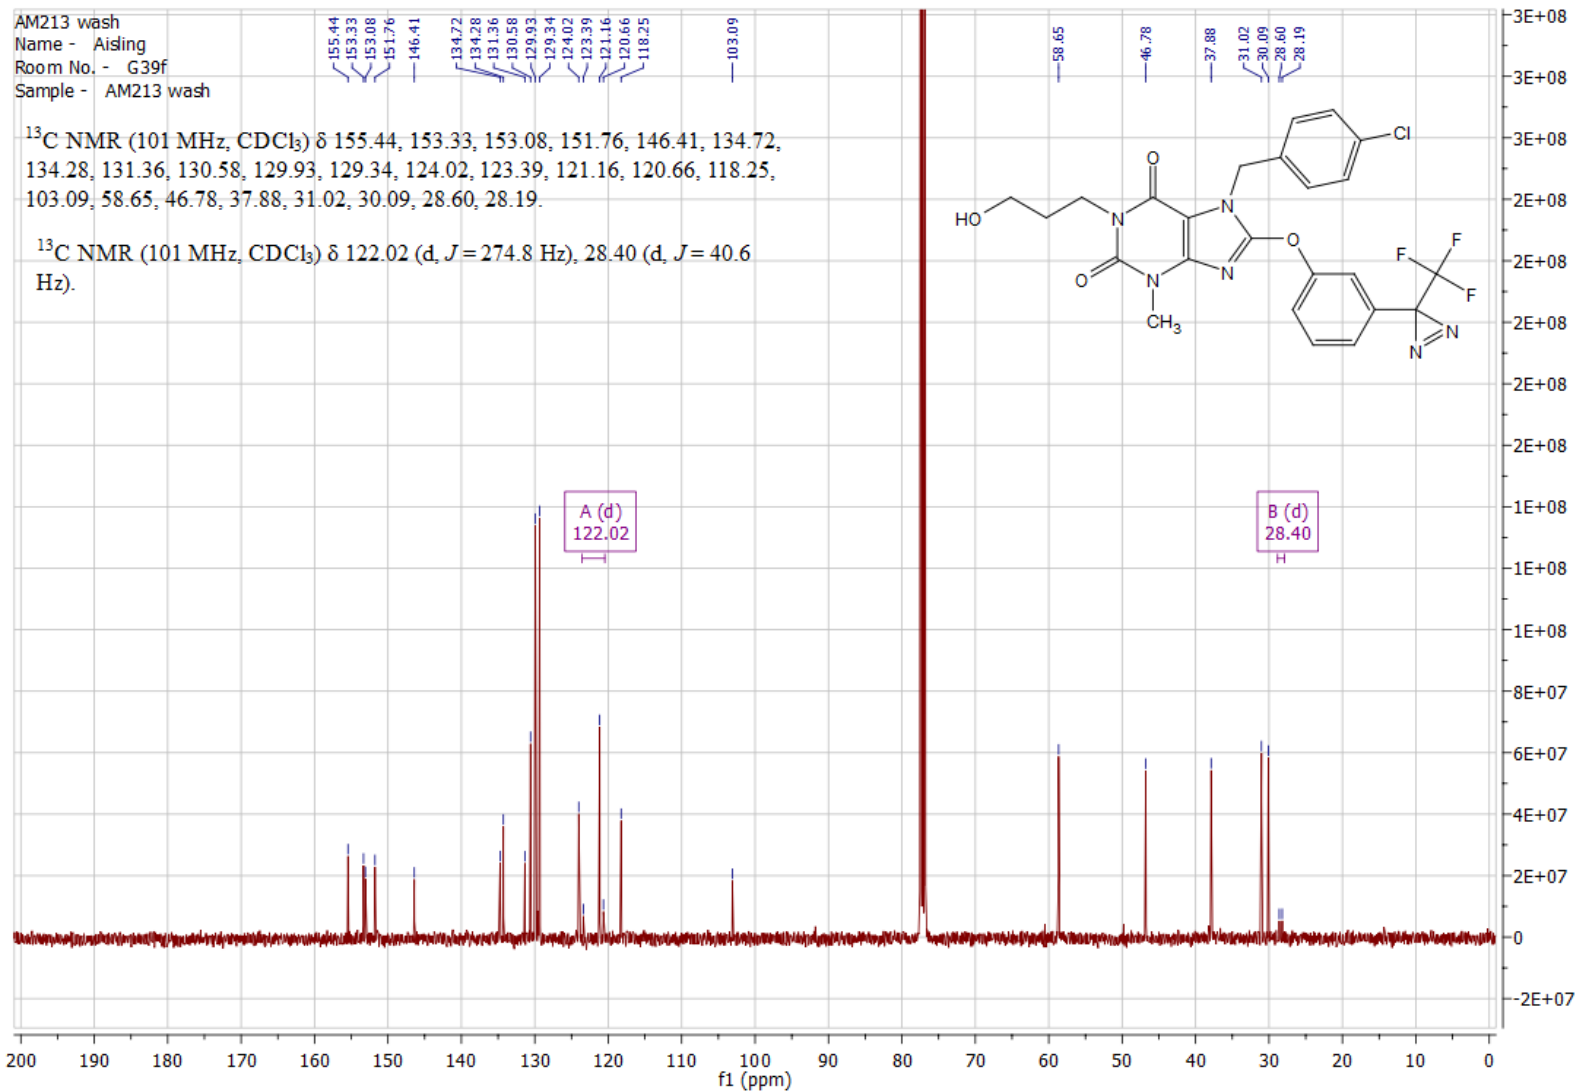

Supplementary Figure 16.  $^{13}\text{C}$  NMR spectrum of Pico145-DA 4.

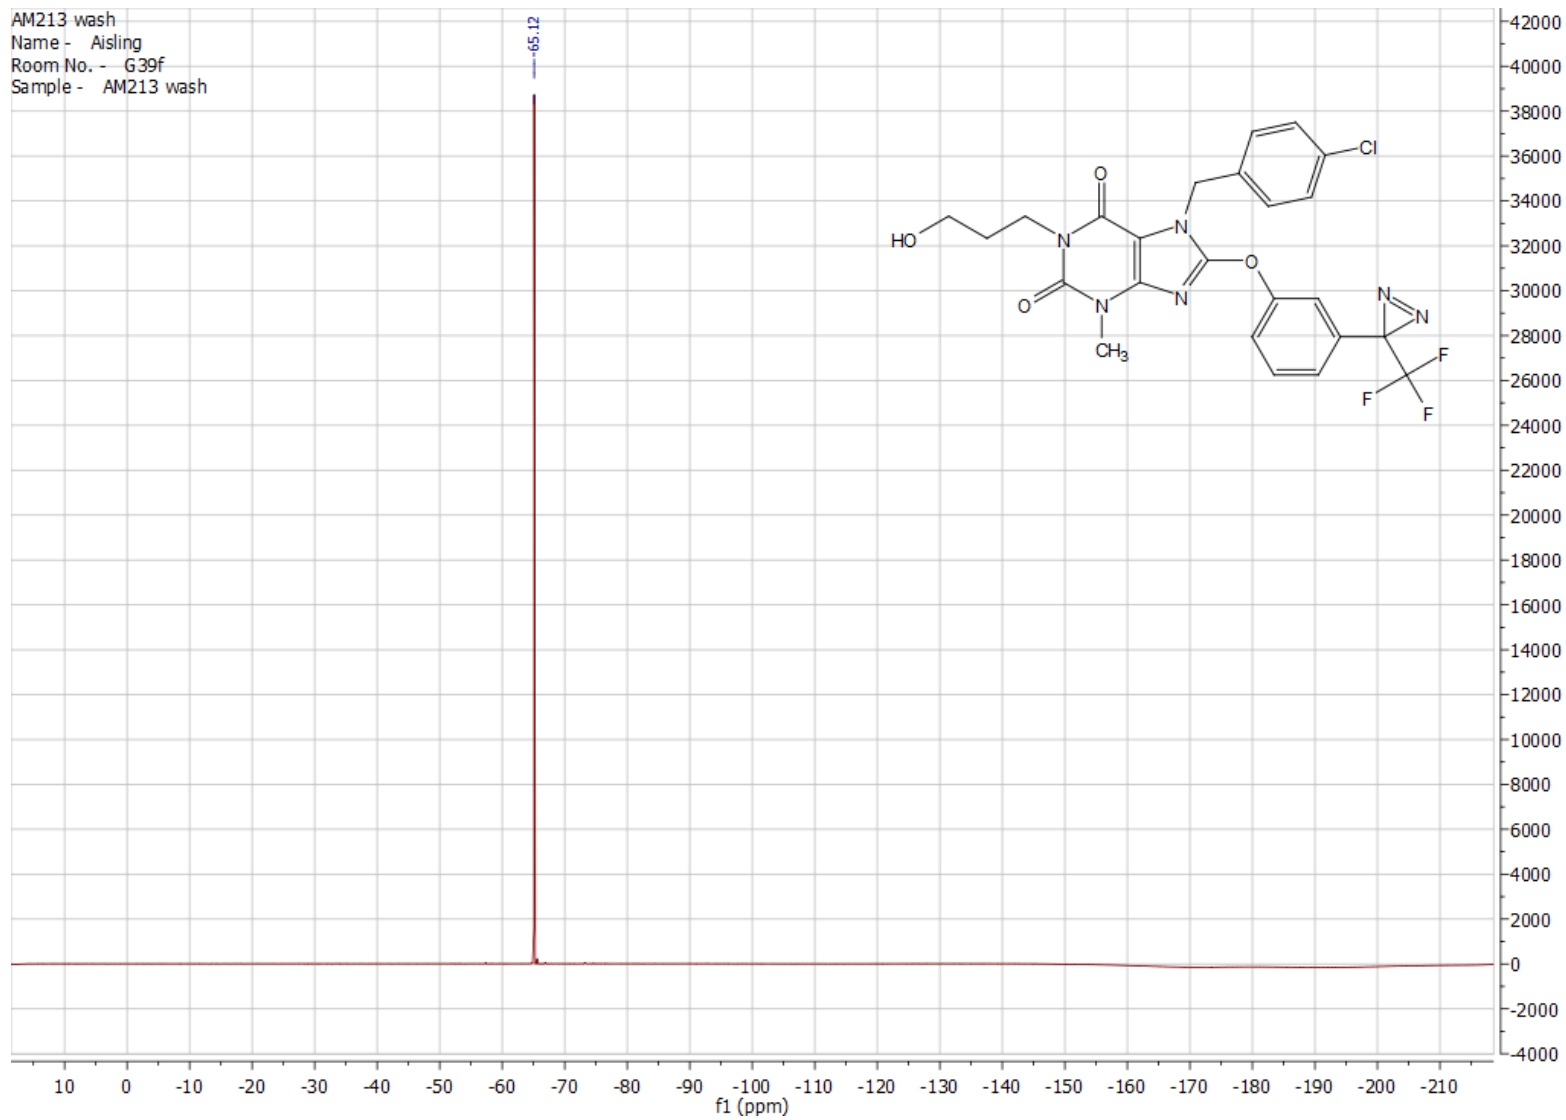

Supplementary Figure 17.  $^{19}\text{F}$  NMR spectrum of Pico145-DA 4.

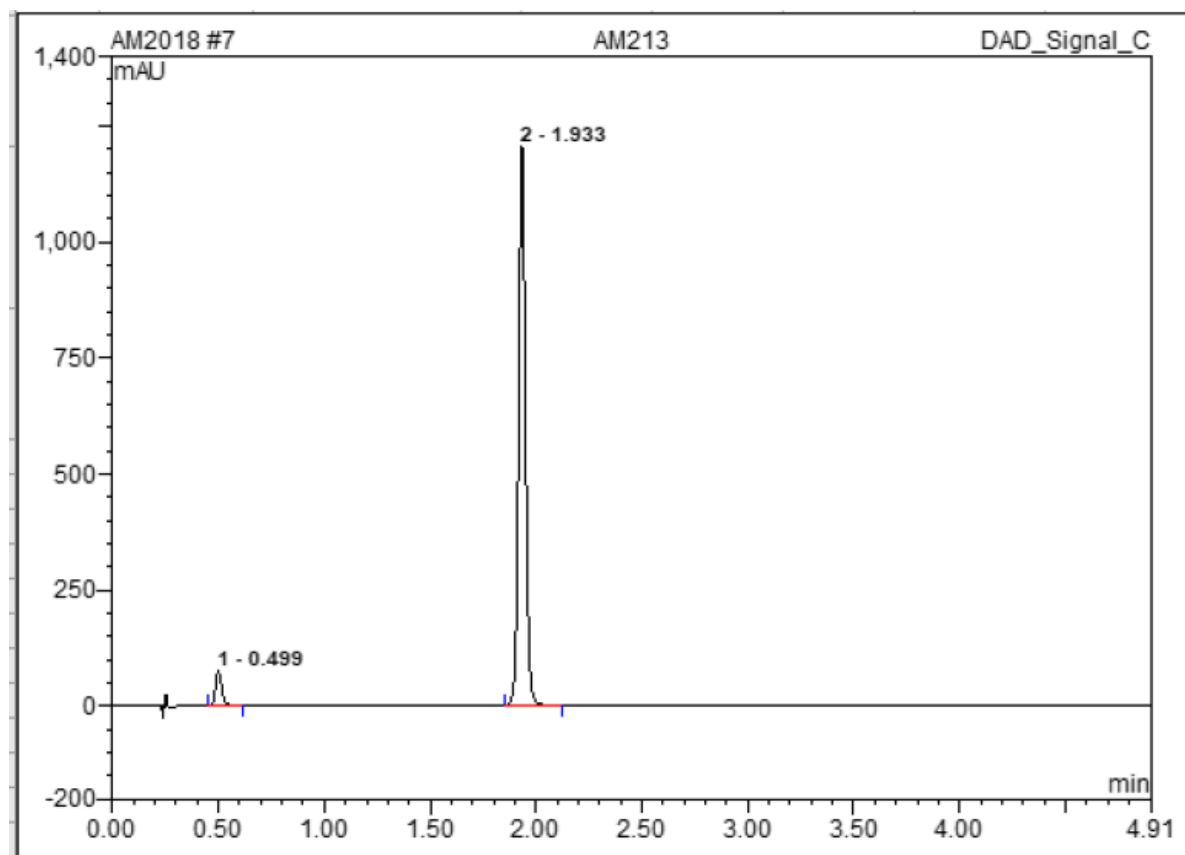

**Supplementary Figure 18.** HPLC chromatogram of Pico145-DA **4** (MeCN/water 50-95%).

## Synthesis of Pico145-DAAlk 5

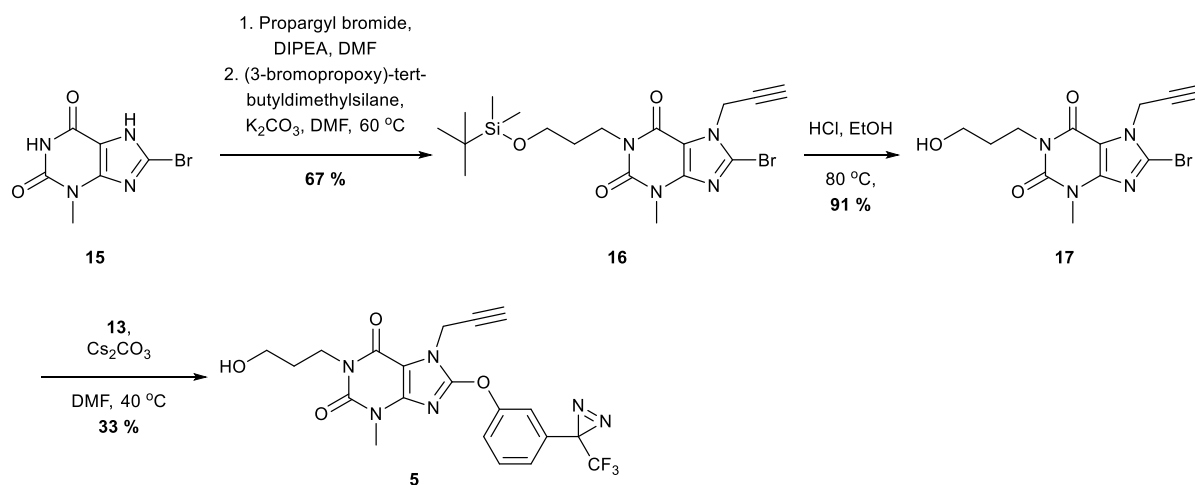

Supplementary Figure 19. Synthetic route to Pico145-DAAlk 5.

### 8-bromo-1-(3-((tert-butyltrimethylsilyloxy)propyl)-3-methyl-7-(prop-2-yn-1-yl)-2,3,6,7-tetrahydro-1H-purine-2,6-dione 16

Propargyl bromide (80% in toluene, 1.36 mL, 12.2 mmol) was added to a solution of 8-bromo-3-methyl-1H-purine-2,6(3H,7H)-dione, **15**, (3 g, 12.2 mmol) and N,N-diisopropylethylamine (2.14 mL, 12.2 mmol) in DMF (25 mL) and the reaction mixture was stirred for 16 h. Water (30 mL) was added to the reaction mixture and the crude product was isolated by filtration, washed with water (10 mL), ethanol (10 mL) and ether (10 mL). The crude product was carried forward without purification. All crude material was dissolved in DMF (30 mL),  $K_2CO_3$  (1.6 g, 12.2 mmol) and (3-bromopropoxy)-tert-butyltrimethylsilyl ether (2.97 g, 12.2 mmol) were added, and the mixture was stirred at 60 °C for 16 h. The reaction mixture was poured into water (60 mL) and the organics were extracted with EtOAc (4 × 100 mL), washed with aqueous LiCl (1 N, 2 × 50 mL), brine (50 mL), dried ( $Na_2SO_4$ ), and concentrated *in vacuo*. The crude material was purified by column chromatography ( $SiO_2$ ; hexane-EtOAc 95:5 → 1:1) to yield the title compound as a white solid (3.8 g, 67 %).  $R_f$  0.3 (7:3 hexane:EtOAc);  $\delta_H$  (400 MHz,  $CDCl_3$ ) 5.15 (d,  $J$  2.5 Hz, 2H), 4.07 (t,  $J$  7.2, 2H), 3.69 (t,  $J$  6.2, 2H), 3.51 (s, 3H), 2.38 (t,  $J$  2.5, 1H), 1.85 (tt,  $J$  7.2, 6.2, 2H), 0.84 (s, 9H), 0.00 (s, 6H);  $\delta_C$  (100 MHz,  $CDCl_3$ ) 154.1, 151.0, 148.2, 127.4, 108.5, 75.7, 74.3, 61.3, 39.4, 36.5, 31.0, 29.8, 25.9, 18.3, 0.0; ESI-HRMS: calcd. for  $C_{18}H_{27}BrN_4O_3SiNa$   $[M+Na]^+$  477.0928, found 477.0920.

### 8-bromo-1-(3-hydroxypropyl)-3-methyl-7-(prop-2-yn-1-yl)-2,3,6,7-tetrahydro-1H-purine-2,6-dione 17

8-bromo-1-(3-((tert-butyltrimethylsilyloxy)propyl)-3-methyl-7-(prop-2-yn-1-yl)-2,3,6,7-tetrahydro-1H-purine-2,6-dione **16**, (1.0 g, 2.2 mmol) and aqueous HCl (conc., 4 mL) were suspended in EtOH (20 mL) and heated under reflux for 1.5 h. The reaction mixture was concentrated *in vacuo* and the crude material was triturated ( $Et_2O$ , 20 mL), filtered and washed with  $Et_2O$  (2 × 5 mL), and then concentrated *in*

*vacuo* to yield the title compound as a white solid (682 mg, 91 %).  $\delta$ H (400 MHz, CDCl<sub>3</sub>) 5.18 (d, *J* 2.5 Hz, 2H), 4.19 (t, *J* 5.8, 2H), 3.56 (s, 3H) 3.54 (t, *J* 5.7, 2H), 2.43 (t, *J* 2.5, 1H), 1.90 (tt, *J* 5.8, 5.7, 2H)  $\delta$ C (100 MHz, CDCl<sub>3</sub>) 154.8, 151.5, 148.6, 128.4, 108.4, 75.5, 74.6, 58.8, 38.2, 36.6, 35.6, 30.2; ESI-HRMS: calcd. for C<sub>12</sub>H<sub>13</sub>BrN<sub>4</sub>O<sub>3</sub>Na [M+Na]<sup>+</sup> 363.0063, found 363.0057.

**1-(3-hydroxypropyl)-3-methyl-7-(prop-2-yn-1-yl)-8-{3-[3-(trifluoromethyl)-3H-diazirin-3-yl]phenoxy}-2,3,6,7-tetrahydro-1H-purine-2,6-dione (Pico145-DAAlk) 5**

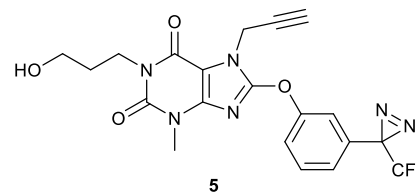

Cs<sub>2</sub>CO<sub>3</sub> (381 mg, 1.08 mmol) was added to a solution of 8-bromo-1-(3-hydroxypropyl)-3-methyl-7-(prop-2-yn-1-yl)-2,3,6,7-tetrahydro-1H-purine-2,6-dione **17** (307 mg, 0.90 mmol) in DMF (8 mL). After 5 min, 3-[3-(trifluoromethyl)-3H-diazirin-3-yl]phenol **13** (200 mg, 0.99 mmol) was added and the reaction mixture was heated to 40 °C for 1 h. The mixture was cooled, partitioned between EtOAc (10 mL) and water (10 mL). The organics were washed with aqueous LiCl (1 M, 3 × 10 mL), dried (Na<sub>2</sub>SO<sub>4</sub>) and concentrated *in vacuo*. The crude material was purified by column chromatography (SiO<sub>2</sub>; eluting with 3:7 EtOAc:hexane) to yield the *title compound* as an off-white solid (135 mg, 33 %). R<sub>f</sub> 0.3 (3:7 EtOAc:hexane);  $\delta$ H (600 MHz, CDCl<sub>3</sub>) 7.50 – 7.46 (m, 1H), 7.45 – 7.41 (m, 1H), 7.30 (s, 1H), 7.09 (d, *J* 7.7 Hz, 1H), 5.11 (d, *J* 2.5, 2H), 4.23 – 4.17 (m, 2H), 3.57 – 3.51 (m, 2H), 3.47 – 3.45 (m, 3H), 2.40 (t, *J* 2.5, 1H), 1.95 – 1.87 (m, 2H), 1.62 (s, 1H);  $\delta$ C (101 MHz, CDCl<sub>3</sub>) 155.3, 153.4, 153.1, 151.8, 150.5, 146.4, 131.3, 130.5, 124.0, 122.1 (q, *J* 275.0, CF<sub>3</sub>), 121.3, 118.4, 102.9, 73.9, 58.7, 37.9, 33.5, 31.0, 30.1, 28.4 (q, *J* 40.5, C-diazirine);  $\delta$ F (235 MHz, CDCl<sub>3</sub>) -65.0; ESI-HRMS: calcd. for C<sub>20</sub>H<sub>18</sub>F<sub>3</sub>N<sub>6</sub>O<sub>4</sub> [M+H]<sup>+</sup> 485.1156, found 485.1154, HPLC: RT = 0.85 min.



AM249\_pure  
single\_pulse

$^1\text{H}$  NMR (600 MHz, CHLOROFORM-D)  $\delta$  7.50 – 7.46 (m, 1H), 7.45 – 7.41 (m, 1H), 7.30 (s, 1H), 7.09 (d,  $J = 7.7$  Hz, 1H), 5.11 (d,  $J = 2.5$  Hz, 2H), 4.23 – 4.17 (m, 2H), 3.57 – 3.51 (m, 2H), 3.47 – 3.45 (m, 3H), 2.40 (t,  $J = 2.5$  Hz, 1H), 1.95 – 1.87 (m, 2H).

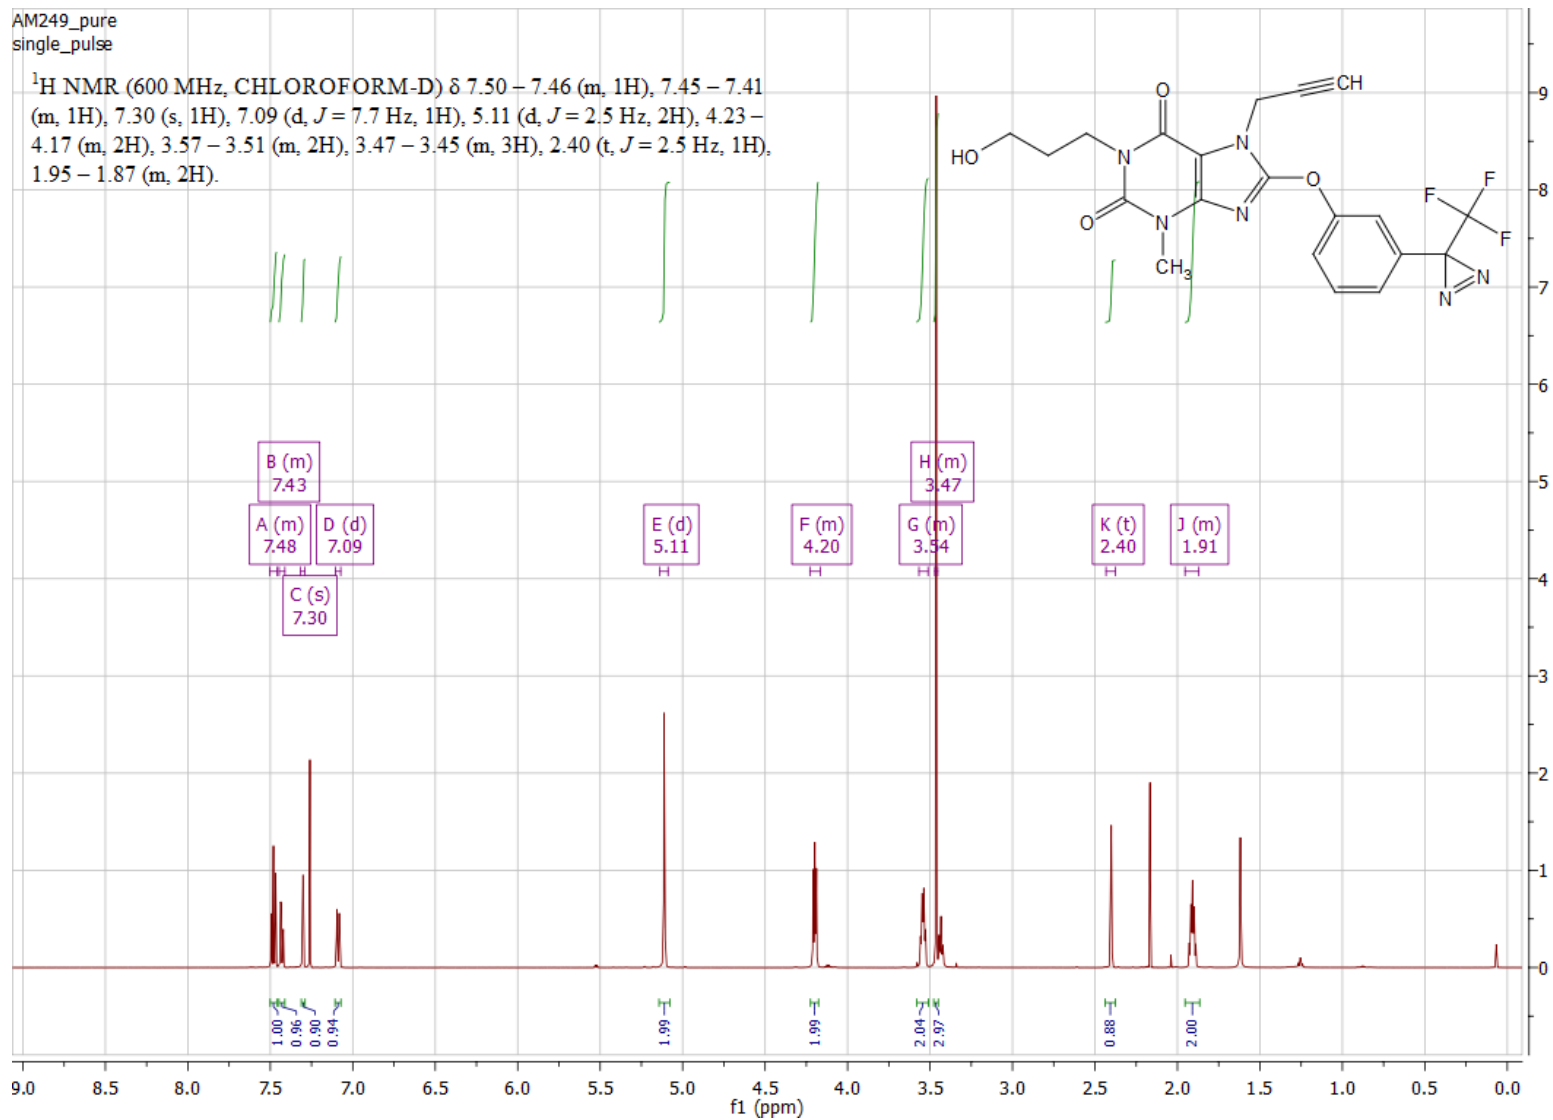

Supplementary Figure 20.  $^1\text{H}$  NMR spectrum of Pico145-DAAIk 5.

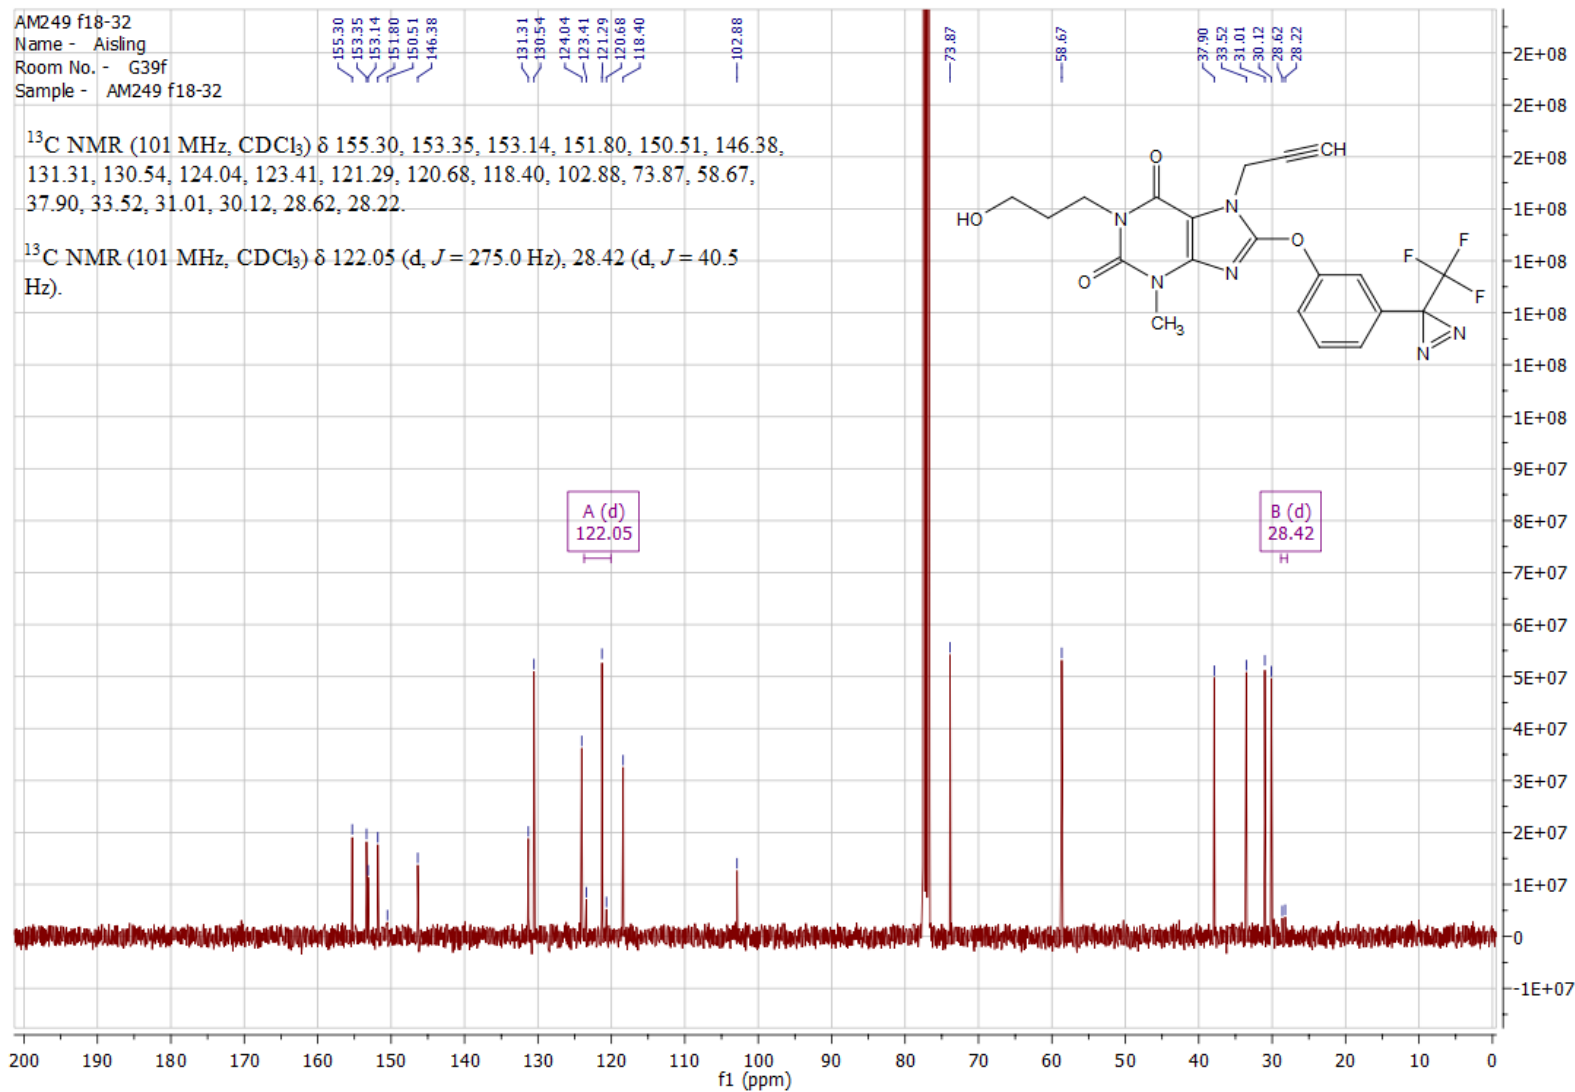

Supplementary Figure 21.  $^{13}\text{C}$  NMR spectrum of Pico145-DAAIk 5.

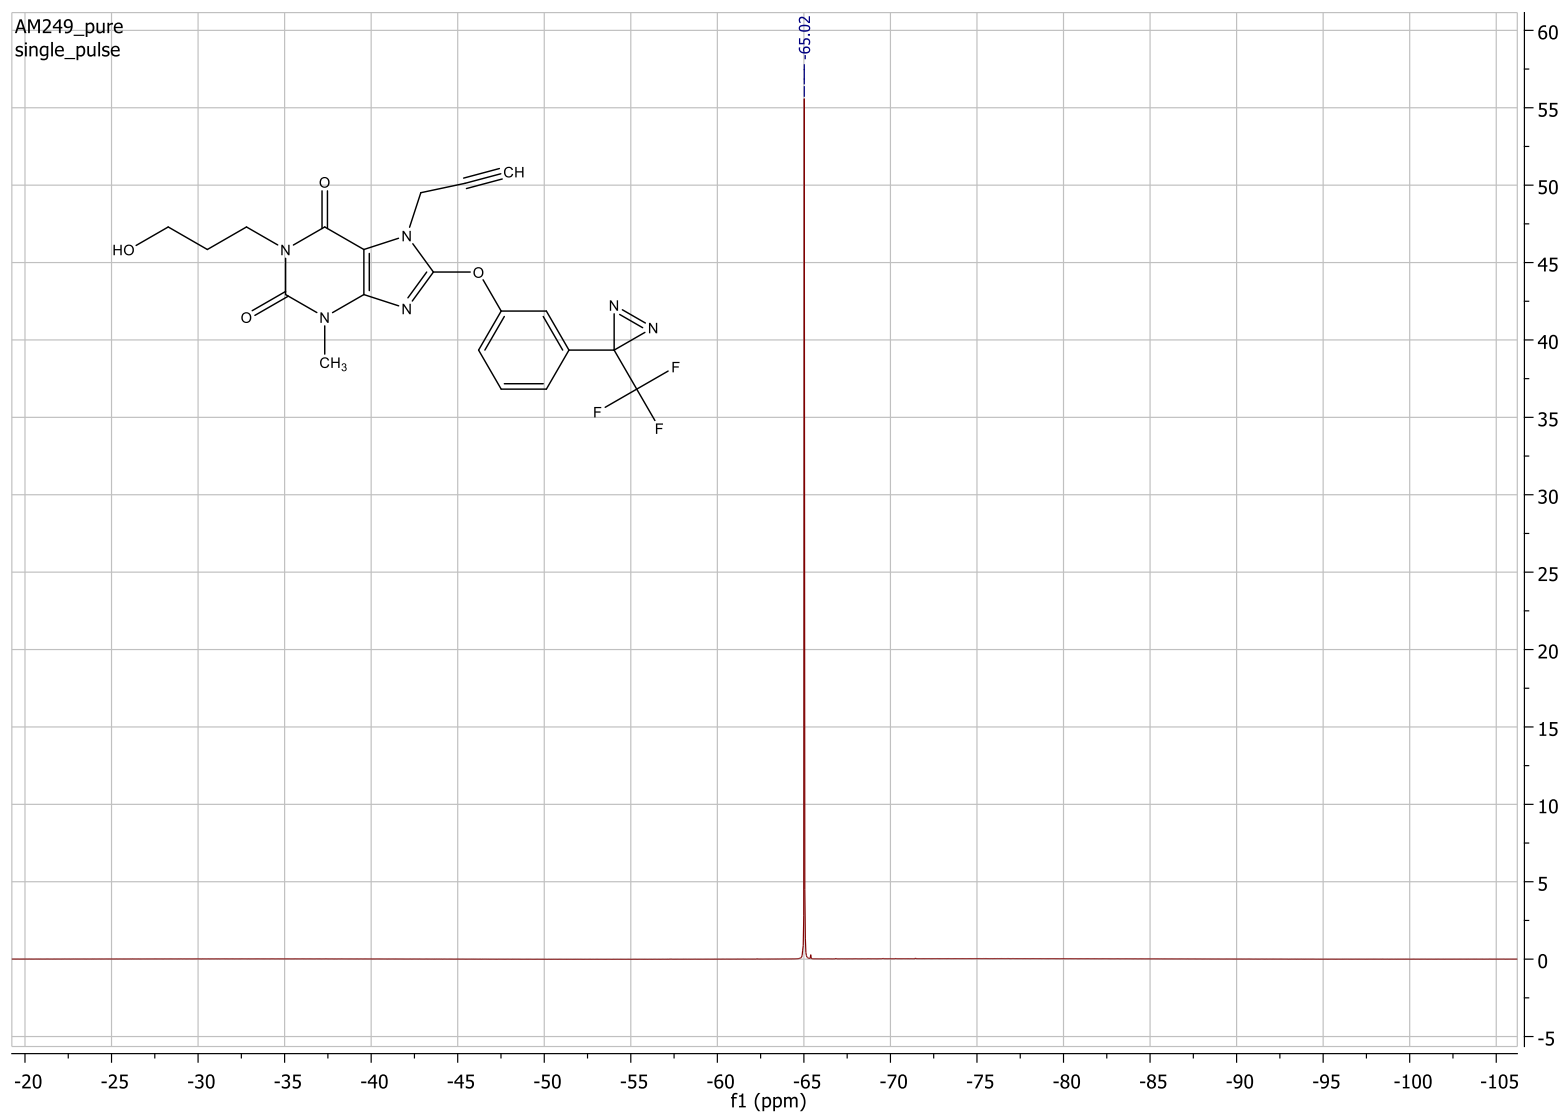

Supplementary Figure 22.  $^{19}\text{F}$  NMR spectrum of Pico145-DAIk 5.

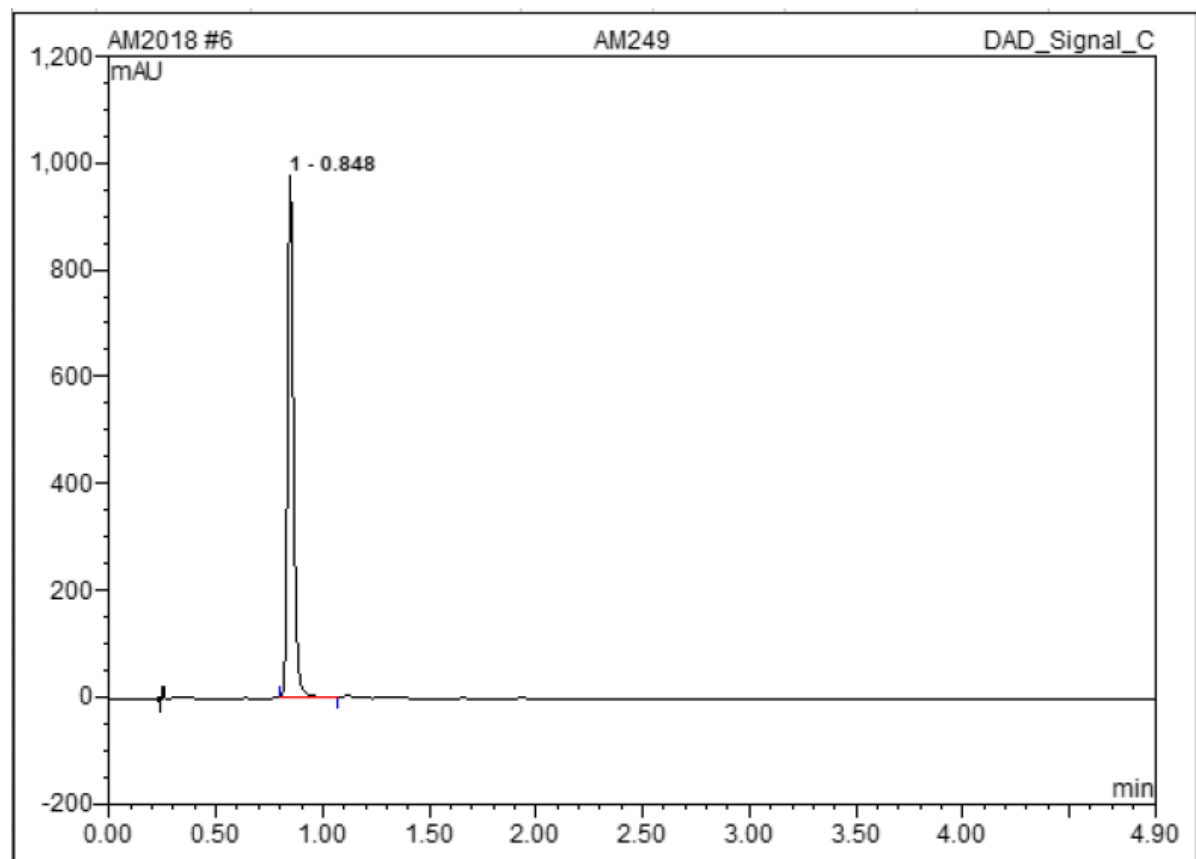

**Supplementary Figure 23.** HPLC chromatogram of Pico145-DAAIk 5 (MeCN/water 50-95%).

## Synthesis of diazirine building block 23

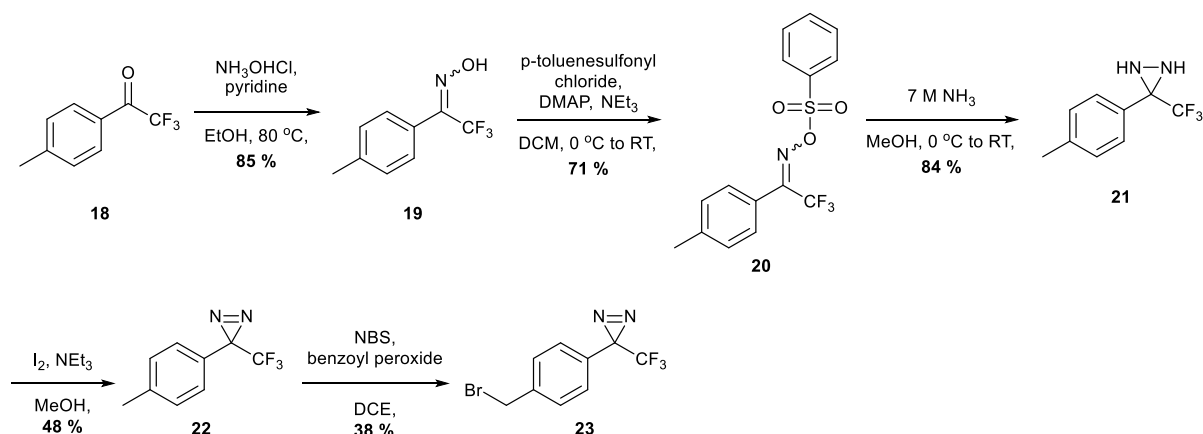

Supplementary Figure 24. Synthetic route to diazirine building block 23.

### N-(2,2,2-trifluoro-1-(4-methylphenyl)ethylidene)hydroxylamine <sup>19</sup><sup>8</sup>

Hydroxylamine hydrochloride (1.80 g, 26.6 mmol) was added to a solution of 4'-methyl-2,2,2-trifluoroacetophenone **18** (2.00 mL, 13.3 mmol) in anhydrous ethanol (40 mL) and anhydrous, distilled pyridine (10 mL). The reaction mixture was stirred for 18 h under reflux, and then concentrated *in vacuo*. The residue was dissolved in Et<sub>2</sub>O (50 mL), washed with H<sub>2</sub>O (3 x 50 mL), dried over Na<sub>2</sub>SO<sub>4</sub> and concentrated *in vacuo* to give a clear oil (2.31 g, 85 %). R<sub>f</sub> 0.3 (4:6 EtOAc:hexane); δH (500 MHz, CDCl<sub>3</sub>) 7.46 (d, *J* 8.1 Hz, 2H), 7.30 (d, *J* 8.1, 2H), 2.42 (s, 3H); δC (101 MHz, CDCl<sub>3</sub>) 146.8 (q, *J* 32.0, C=N-OH), 140.4, 129.3, 129.2, 128.8, 121.2 (q, *J* 274.4, CF<sub>3</sub>), 21.6; δF (376 MHz, CDCl<sub>3</sub>) -66.3; ESI: m/z 204.3 [M+H]<sup>+</sup>; ESI-HRMS: calcd. for C<sub>9</sub>H<sub>9</sub>F<sub>3</sub>NO [M+H]<sup>+</sup> 204.0631, found 204.0629. Data consistent with literature.<sup>8</sup>

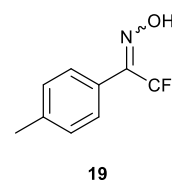

### 2,2,2-trifluoro-1-(4-methylphenyl)ethylidene)amino-4-

**methylbenzenesulfonate, 20**<sup>8</sup> p-Toluenesulfonyl chloride (2.96 g, 15.5 mmol) was added to a solution of N-(2,2,2-trifluoro-1-(4-methylphenyl)ethylidene)hydroxylamine **19** (2.30 g, 11.3 mmol), DMAP (0.14 g, 1.13 mmol) and anhydrous, distilled trimethylamine (1.73 mL, 12.4 mmol) in anhydrous DCM (40 mL) at 0 °C. The mixture was stirred for 3 h, while it was allowed to warm to room temperature, and then stirred at room temperature overnight. The reaction mixture was washed with water (3 x 50 mL), dried over Na<sub>2</sub>SO<sub>4</sub>, concentrated *in vacuo* and purified by column chromatography (SiO<sub>2</sub>; 6:4 DCM:hexane) to give a white solid; (2.85 g, 71 %). R<sub>f</sub> 0.5 (6:4 EtOAc:hexane); δH (500 MHz, CDCl<sub>3</sub>) 7.91 – 7.87 (m, 2H), 7.39 (d, *J* 8.2 Hz, 2H), 7.32 (d, *J* 8.2, 2H), 7.27 (d, *J* 9.6 Hz, 2H), 2.48 (s, 3H), 2.41 (s, 3H); δC (126 MHz, CDCl<sub>3</sub>) 146.1, 142.2, 131.2, 129.8, 129.5, 129.3, 128.5, 121.7, 21.8, 21.5 (CF<sub>3</sub> and C=N not observed due to signal intensity and <sup>13</sup>C-<sup>19</sup>F splitting); δF (376 MHz, CDCl<sub>3</sub>) -66.6; ESI: m/z 358.3 [M+H]<sup>+</sup>; ESI-HRMS: calcd. for C<sub>16</sub>H<sub>15</sub>F<sub>3</sub>NO<sub>3</sub>S [M+H]<sup>+</sup> 358.0719, found 358.0717. Data consistent with literature.<sup>8</sup>

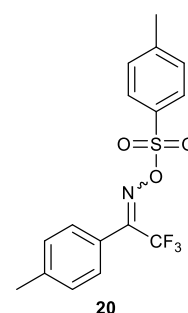

**3-(4-methylphenyl)-3-(trifluoromethyl)diaziridine 21** 2,2,2-trifluoro-1-(4-methylphenyl)ethylidene)amino-4-methylbenzenesulfonate **20** (2.80 g, 7.97 mmol) was dissolved in a 7 M solution of ammonia in methanol (30 mL) at 0 °C under a gaseous ammonia atmosphere. The reaction mixture was stirred vigorously to dissolve the starting material whilst bubbling ammonia through the solution. The solution was allowed to warm to room temperature after 6 h and stirred for a further 16 hours. Aqueous sodium bicarbonate (sat., 4 mL) was added to the reaction mixture, leading to precipitation of a white solid, which was removed by vacuum filtration. The filtrate was extracted with DCM (50 mL), washed with water (3 x 50 mL) and brine (1 x 25 mL), dried over Na<sub>2</sub>SO<sub>4</sub>, and concentrated *in vacuo* to give an orange solid (0.86 g, 84 %). R<sub>f</sub> 0.6 (1:9 EtOAc:hexane); δH (400 MHz, CDCl<sub>3</sub>) 7.49 (d, *J* 8.1 Hz, 2H), 7.23 (d, *J* 8.1, 2H), 2.76 (d, *J* 8.8, 1H), 2.38 (s, 3H), 2.19 (d, *J* 8.8, 1H); δC (101 MHz, CDCl<sub>3</sub>) 140.3, 130.4, 129.4, 128.0, 123.6 (q, *J* 278.2, CF<sub>3</sub>), 57.9 (q, *J* 35.9, C-diaziridine), 21.3; δF (376 MHz, CDCl<sub>3</sub>) -75.7; ESI: m/z 203.3 [M+H]<sup>+</sup>; ESI-HRMS: calcd. for C<sub>9</sub>H<sub>10</sub>F<sub>3</sub>N<sub>2</sub> [M+H]<sup>+</sup> 203.0791, found 203.0791.

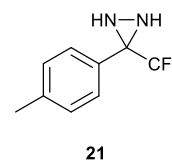

**3-(4-methylphenyl)-3-(trifluoromethyl)diazirine 22** 3-(4-methylphenyl)-3-(trifluoromethyl)diaziridine **21** (0.80 g, 3.96 mmol) was dissolved in methanol (20 mL), the flask wrapped in foil and the mixture stirred at 0 °C for 5 min. Distilled triethylamine (0.83 mL, 5.94 mmol) was added to the mixture and stirring continued for 5 min. Iodine crystals were added slowly until the solution was consistently red-brown in colour. EtOAc (5 mL) was added to the solution and the mixture was washed with 1 M HCl (5 mL). The organic fractions were washed with aqueous sodium thiosulfate (10 %, 5 mL) and brine (5 mL), dried over Na<sub>2</sub>SO<sub>4</sub>, concentrated *in vacuo*, and purified by column chromatography (SiO<sub>2</sub>; 9:1 hexane:EtOAc) to give an orange oil (0.38 g, 48 %). R<sub>f</sub> 0.6 (1:9 EtOAc:hexane); δH (500 MHz, CDCl<sub>3</sub>) 7.22 (d, *J* 7.9 Hz, 2H), 7.12 (d, *J* 7.9, 2H), 2.39 (s, 3H); δC (126 MHz, CDCl<sub>3</sub>) 140.0, 129.7, 126.6, 126.3, 122.4 (q, *J* 274.5, CF<sub>3</sub>), 28.6 (q, *J* 40.3, C-diazirine), 21.3; δF (376 MHz, CDCl<sub>3</sub>) -65.5.

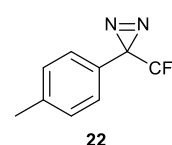

**3-(4-(bromomethyl)phenyl)-3-(trifluoromethyl)diazirine, 23**<sup>8</sup> Dibenzoyl peroxide (12 mg, 0.05 mmol) was added to a solution of 3-(4-methylphenyl)-3-(trifluoromethyl)diazirine **22** (0.20 g, 1.00 mmol) and N-bromosuccinimide (0.21 g, 1.20 mmol) in 1,2-dichloroethane (5 mL) and the resulting mixture was stirred at 70 °C for 2 h. The solution was cooled to room temperature, filtered, and the solid washed with DCM (5 mL). The filtrate was concentrated *in vacuo* and purified by column chromatography (SiO<sub>2</sub>; hexane) to give a white solid (0.11 g, 38 %). R<sub>f</sub> 0.3 (hexane); δH (400 MHz, CDCl<sub>3</sub>) 7.34 (d, *J* 8.3 Hz, 2H), 7.09 (d, *J* 8.3, 2H), 4.38 (s, 2H); δC (101 MHz, CDCl<sub>3</sub>) δ 138.4, 128.4, 128.3, 125.9, 121.0 (q, *J* 274.7, CF<sub>3</sub>), 31.0, 27.3 (q, *J* 40.6, C-diazirine); δF (376 MHz, CDCl<sub>3</sub>) -65.2; ESI: m/z 279.34 [M+H]<sup>+</sup>. Data consistent with literature.<sup>8</sup>

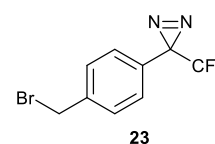

## Synthesis of Pico145-DA2 6

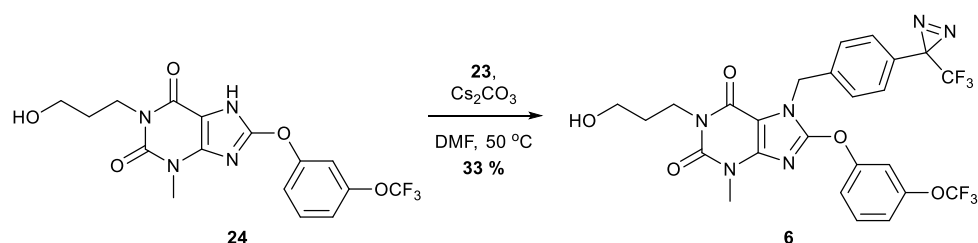

Supplementary Figure 25. Synthetic route to Pico145-DA 6.

### 1-(3-hydroxypropyl)-3-methyl-7-((4-(3-methyldiazirin-3-yl)phenyl)methyl)-8-(3-(trifluoromethoxy)phenoxy)purine-2,6-dione (Pico145-DA2) 6

To a solution of 7-((4-(3-tert-butyldiazirin-3-yl)phenyl)methyl)-1-(3-hydroxypropyl)-3-methyl-8-(3-(trifluoromethoxy)phenoxy)purine-2,6-dione **24** (prepared according to Rubaiy et al., 2017)<sup>7</sup> (0.03 g, 0.07 mmol) and Cs<sub>2</sub>SO<sub>4</sub> (0.05 g, 0.14 mmol) in DMF (5 mL), 3-(4-(bromomethyl)phenyl)-3-(trifluoromethyl)diazirine **23** (0.02 g, 0.08 mmol) was added and the solution was stirred at 50 °C overnight. The product was poured into water (20 mL) and extracted with EtOAc (4 x 20 mL), washed with water (2 x 20 mL), aqueous LiCl (1 N, 2 x 20 mL) and brine (20 mL), dried over Na<sub>2</sub>SO<sub>4</sub>, concentrated *in vacuo*, and purified by column chromatography (SiO<sub>2</sub>; 6:4 hexane:EtOAc) to yield a white residue (0.014 g, 33%). R<sub>f</sub> 0.3 (6:4 EtOAc:hexane); δH (500 MHz, CDCl<sub>3</sub>) 7.51 – 7.42 (m, 3H), 7.23 – 7.13 (m, 5H), 5.47 (s, 2H), 4.23 – 4.15 (m, 2H), 3.58 – 3.48 (m, 2H), 3.45 (s, 3H), 1.96 – 1.84 (m, 2H), hydroxypropyl -OH not detected; δC (126 MHz, CDCl<sub>3</sub>) 155.5, 153.6, 153.0, 151.8, 149.9, 146.4, 137.4, 130.8, 129.64, 128.9, 127.3, 122.1 (q, J 274.8, CF<sub>3</sub>), 120.5 (q, J 260.4, CF<sub>3</sub>) 118.5, 118.0, 113.1, 103.1, 58.6, 46.9, 37.9, 31.0, 30.1, 28.4 (q, J 40.6, C-diazirine); δF (376 MHz, CDCl<sub>3</sub>) -58.0, -65.2; ESI: m/z 599.10 [M+H]<sup>+</sup>; ESI-HRMS: calcd. for C<sub>25</sub>H<sub>21</sub>F<sub>6</sub>N<sub>6</sub>O<sub>5</sub> [M+H]<sup>+</sup> 599.1472, found 599.1479; HRMS: RT = 4.17 min.

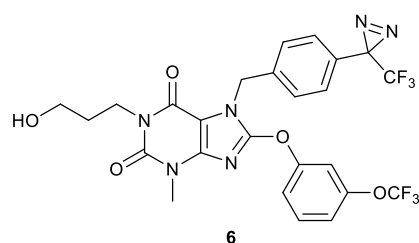

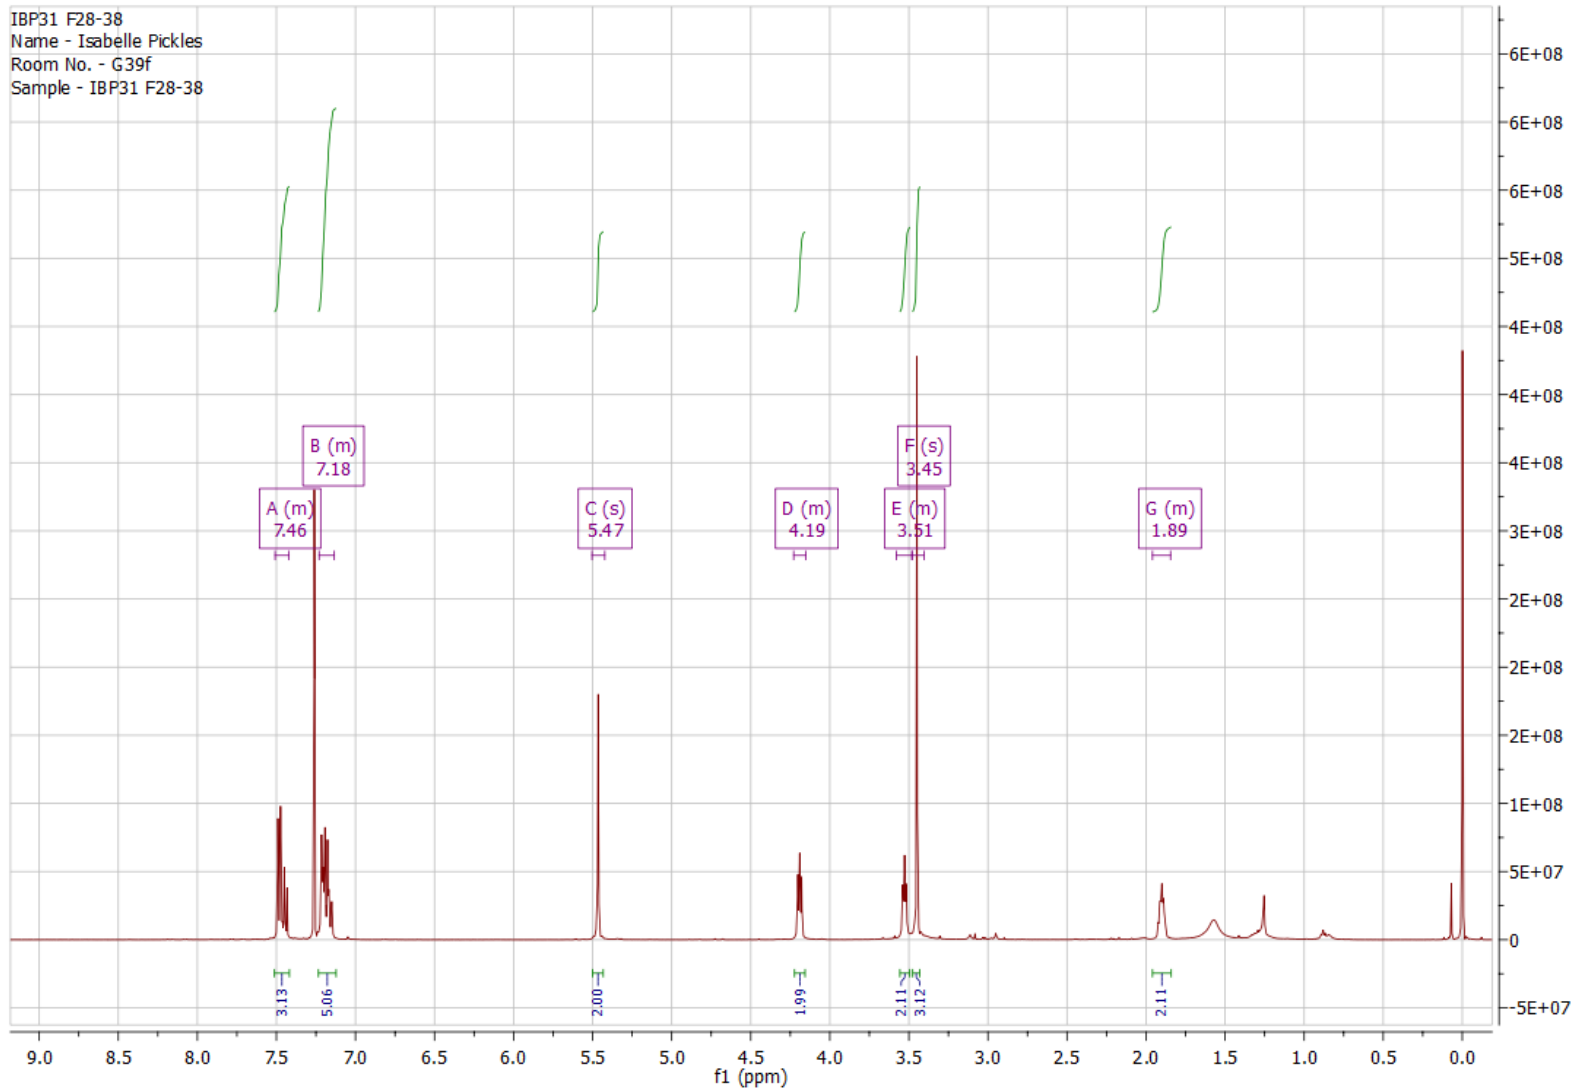

Supplementary Figure 26.  $^1\text{H}$  NMR spectrum of Pico145-DA2 6.



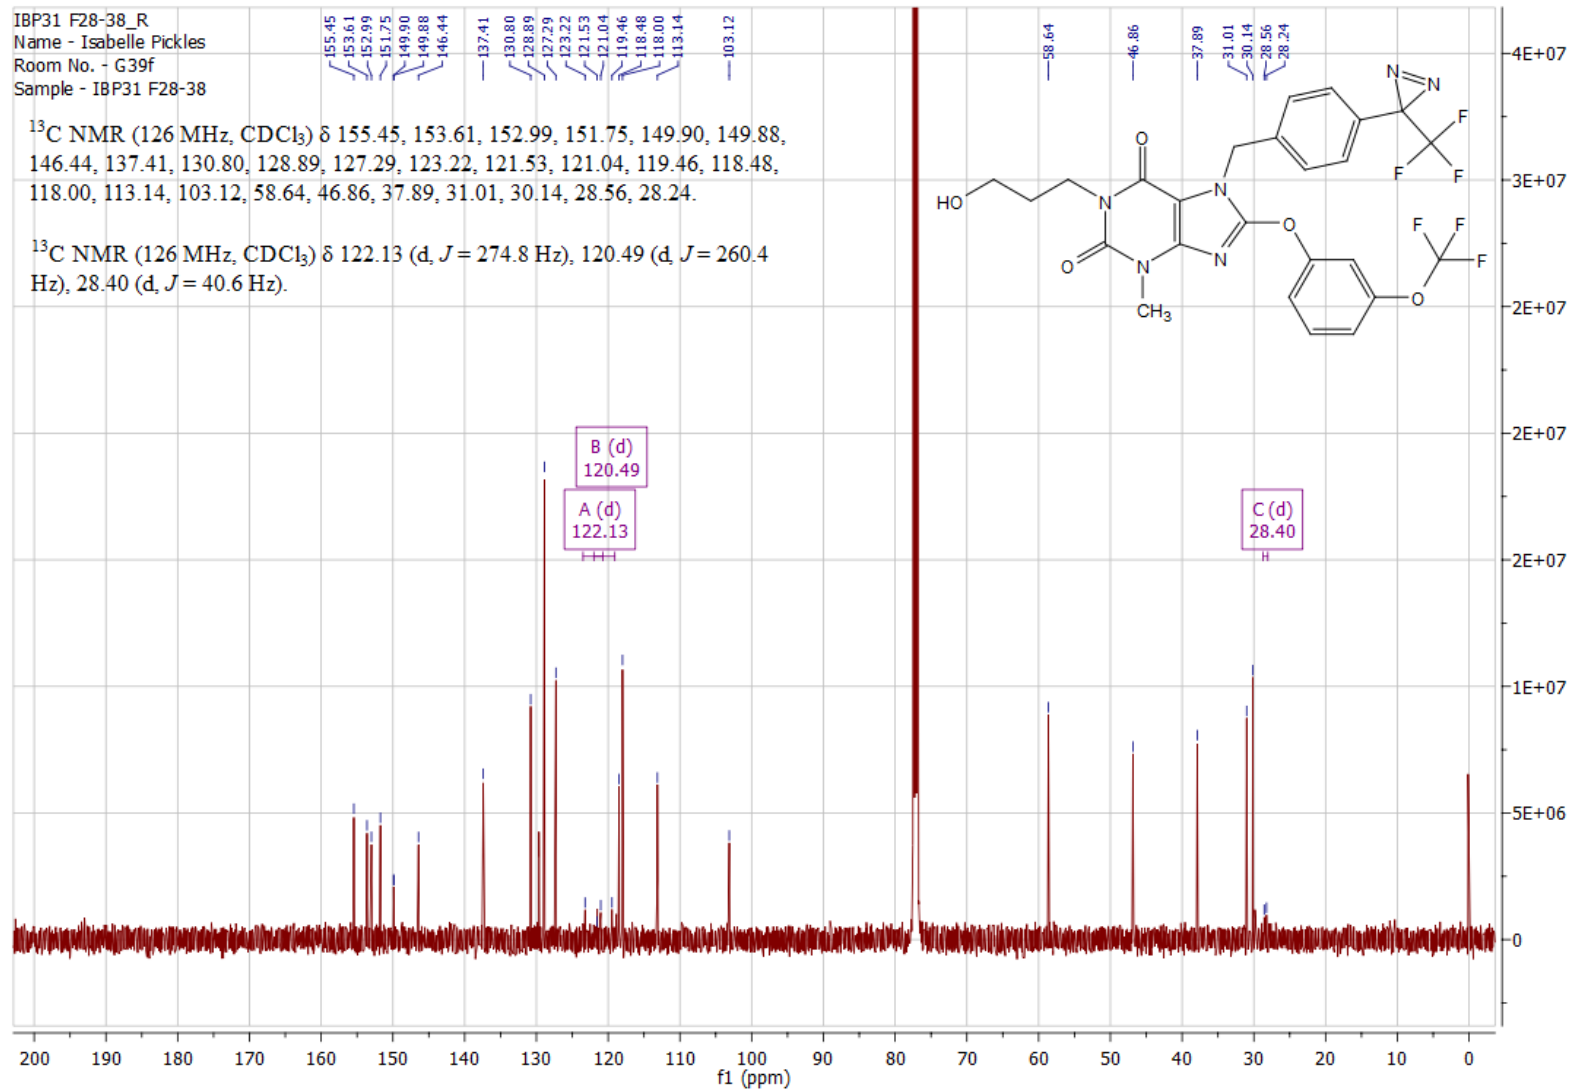

Supplementary Figure 27.  $^{13}\text{C}$  NMR spectrum of Pico145-DA2 6.

Name - Isabelle Pickles  
Room No. - G39f  
Sample - IBP31 F28-38

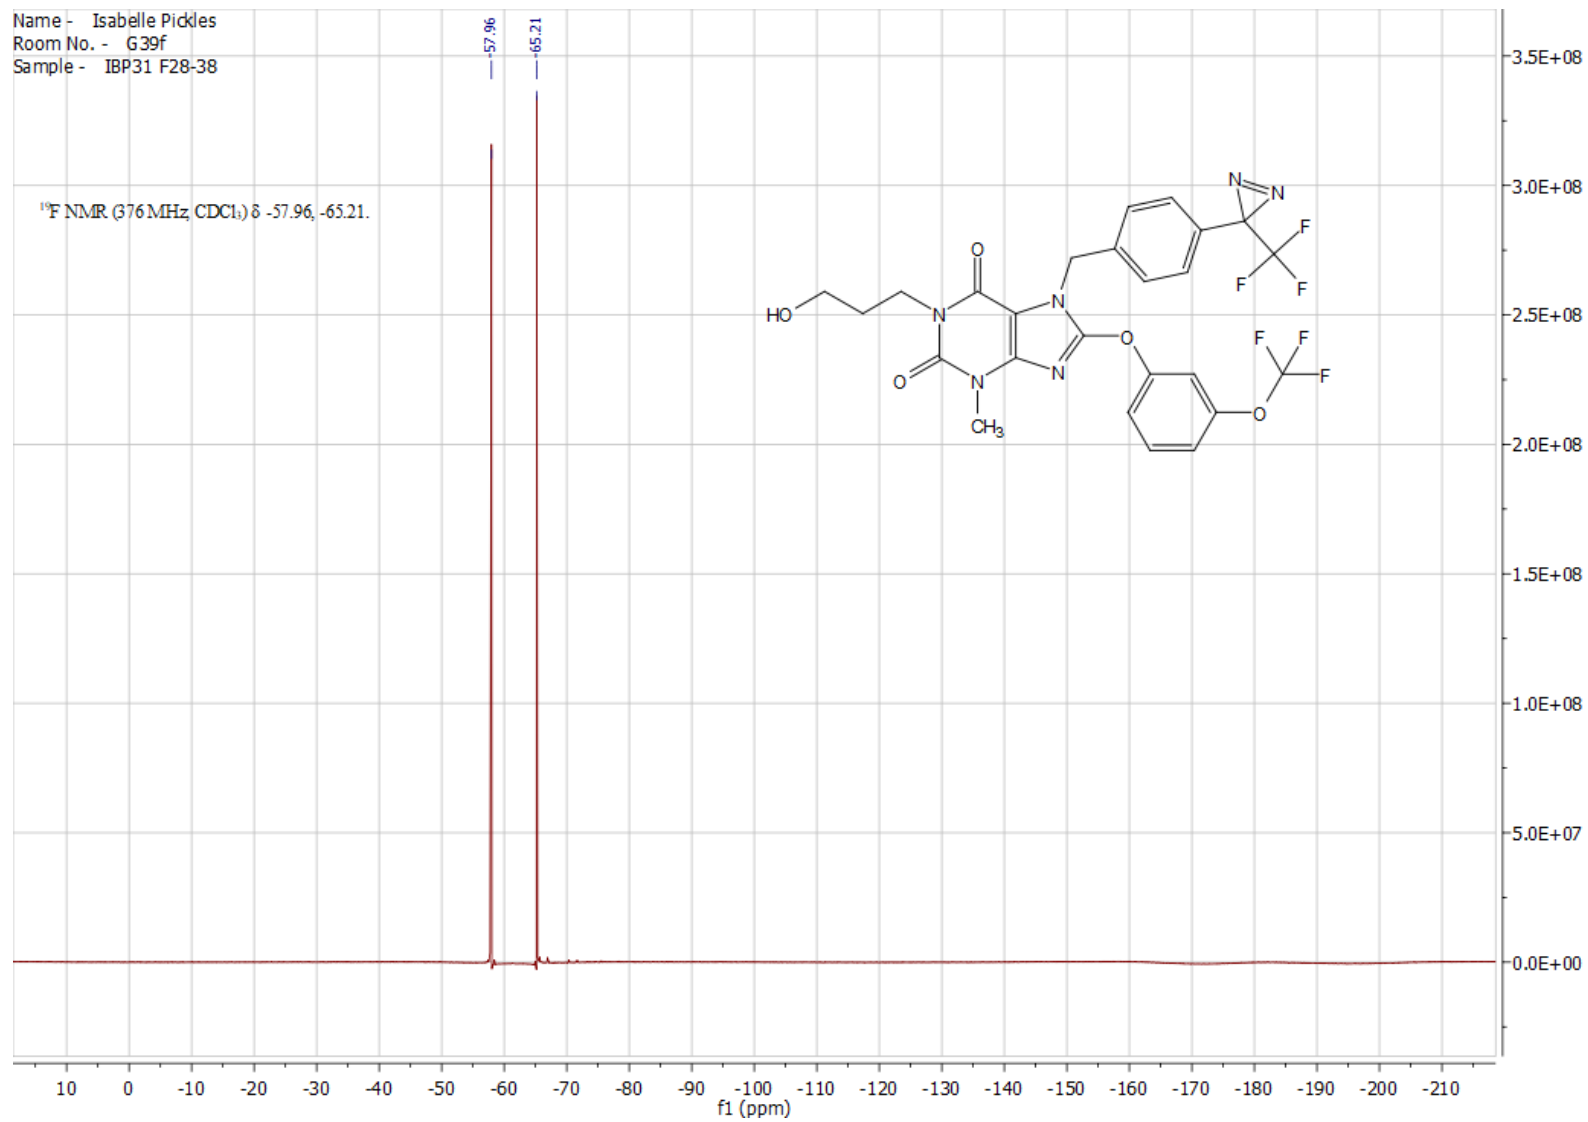

Supplementary Figure 28.  $^{19}\text{F}$  NMR spectrum of Pico145-DA2 6.

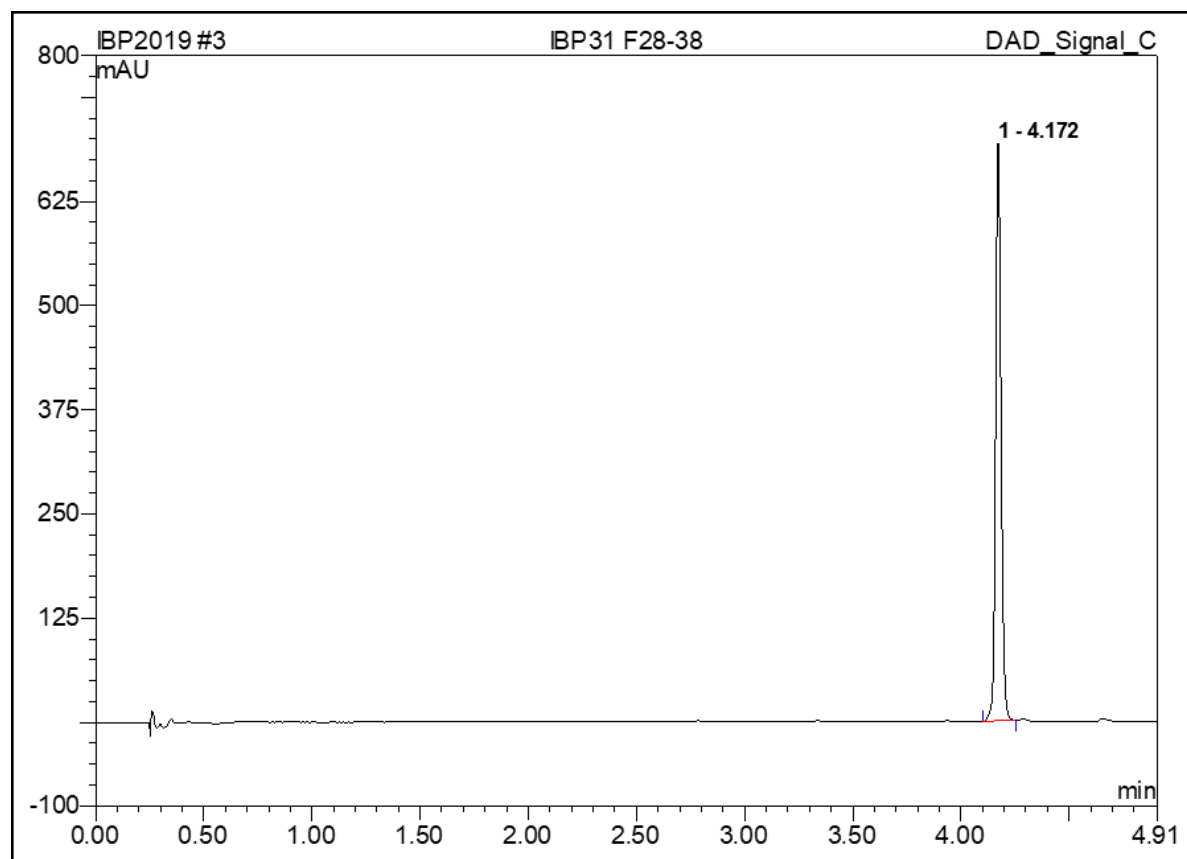

**Supplementary Figure 29.** HPLC chromatogram of Pico145-DA2 **6** (MeCN/water 5-95%).

## Synthesis of Pico145-DAAlk 7

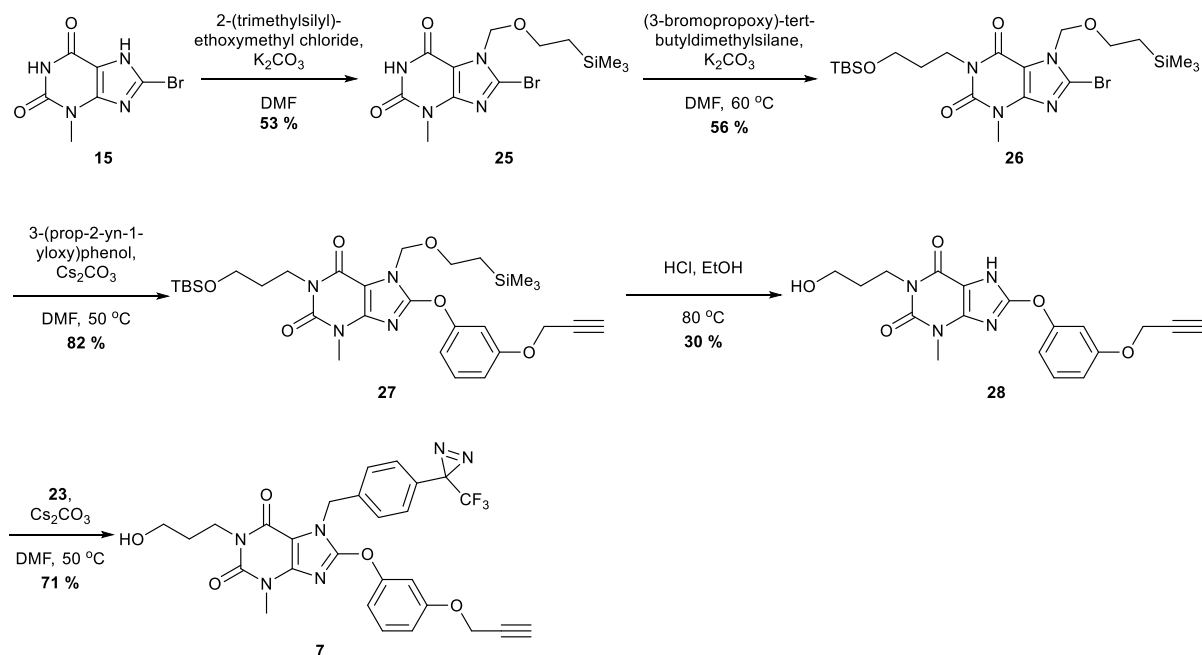

Supplementary Figure 30. Synthetic route to Pico145-DAAlk 7.

### 8-bromo-3-methyl-7-(2-(trimethylsilyl)ethoxymethyl)-1H-purine-2,6-dione 25

2-(trimethylsilyl)ethoxymethyl chloride (0.29 mL, 1.63 mmol) was added dropwise to a solution of 8-bromo-3-methyl-1,7-dihydropurine-2,6-dione **15** (0.40 g, 1.63 mmol) and  $K_2SO_4$  (0.45 g, 3.26 mmol) in DMF (4 mL) at 0 °C, and the reaction was stirred at room temperature overnight. The solution was partitioned between EtOAc (25 mL) and water (25 mL) and the aqueous layer extracted with EtOAc (3 x 25 mL). The combined organic fractions were washed with aqueous LiCl (1 N, 3 x 25 mL) and brine (25 mL), dried over  $Na_2SO_4$ , and concentrated *in vacuo* to give a pale pink solid (0.36 g, 53 %).  $R_f$  0.5 (8:2 EtOAc:hexane);  $\delta H$  (500 MHz,  $CDCl_3$ ) 5.68 (s, 2H), 3.69 (m, 2H), 3.54 (s, 3H), 0.94 (2H, m), -0.01 (s, 9H);  $\delta C$  (101 MHz,  $CDCl_3$ ) 154.9, 152.0, 151.5, 130.5, 110.7, 76.5, 68.8, 30.7, 19.2, 0.0; ESI:  $m/z$  373.17 [ $M-H$ ]<sup>-</sup>; ESI-HRMS: calcd. for  $C_{12}H_{19}BrN_4NaO_3Si$  [ $M+Na$ ]<sup>+</sup> 397.0302, found 397.0302.

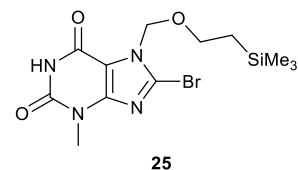

### 8-bromo-1-(3-((tert-butyldimethylsilyl)oxy)propyl)-3-methyl-7-(2-(trimethylsilyl)ethoxy)methylpurine-2,6-dione 26

To a solution of 8-bromo-3-methyl-7-(2-(trimethylsilyl)ethoxymethyl)-1H-purine-2,6-dione **25** (0.35 g, 0.93 mmol) in DMF (5 mL),  $K_2SO_4$  (0.13 g, 0.93 mmol) and (3-bromopropoxy)-tert-butyldimethylsilane (0.23 mL, 1.05 mmol) were added and the reaction mixture stirred at 60 °C overnight. The solution was poured into water (50 mL) and extracted with EtOAc (4 x 50 mL). The organic fractions were washed with aqueous LiCl (1 N, 2 x 50 mL) and brine (50 mL), dried over  $Na_2SO_4$ , and concentrated *in vacuo* to give an orange solid, which was purified by column chromatography ( $SiO_2$ ; 4:6 hexane:EtOAc) to give a colourless oil (0.45 g, 56 %).  $R_f$  0.6 (6:4 EtOAc:hexane);  $\delta H$  (500 MHz,  $CDCl_3$ ) 5.71 (s, 2H), 4.10

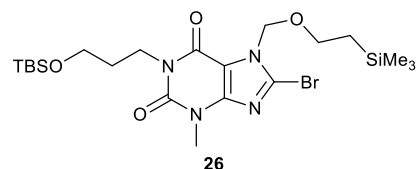

(m, 2H), 3.71 (m, 4H), 3.56 (s, 3H), 1.86 (m, 2H), 0.94 (m, 2H), 0.87 (s, 9H), 0.03 (s, 6H), -0.02 (s, 9H);  $\delta$ C (101 MHz, CDCl<sub>3</sub>) 154.1, 151.1, 148.3, 128.5, 109.2, 74.7, 67.0, 61.2, 39.3, 31.0, 30.0, 26.0, 18.4, 17.9, -1.3, -5.2; ESI: m/z 547.51 [M+H]<sup>+</sup>; ESI-HRMS: calcd. for C<sub>21</sub>H<sub>39</sub>BrN<sub>4</sub>NaO<sub>4</sub>Si<sub>2</sub> [M+Na]<sup>+</sup> 569.1585, found 569.1575.

**1-(3-((tert-butyldimethylsilyloxy)propyl)-3-methyl-8-(3-(prop-2-yn-1-yloxy)phenoxy)-7-((2-(trimethylsilyl)ethoxy)methyl)purine-2,6-dione 27**

3-(prop-2-yn-1-yloxy)phenol<sup>9</sup> (0.29 g, 1.98 mmol) was added to a suspension of 8-bromo-1-(3-tert-butyldimethylsilyloxypropyl)-3-methyl-7-(2-(trimethylsilyl)ethoxymethyl)purine-2,6-dione **26** (0.98 g, 1.80 mmol) and Cs<sub>2</sub>CO<sub>3</sub> (1.27 g, 3.6 mmol) in DMF (10 mL) and the reaction stirred at 80 °C for 7 h. The reaction mixture was allowed to cool to room temperature and then stirred overnight. The reaction mixture was diluted with water (50 mL) and extracted with EtOAc (4 x 50 mL). The combined organic fractions were washed with aqueous LiCl (1 N, 2 x 50 mL) and brine (25 mL), dried over Na<sub>2</sub>SO<sub>4</sub>, concentrated *in vacuo*, and purified by column chromatography (SiO<sub>2</sub>; 6:4 hexane:EtOAc) to give an orange oil (0.91 mg, 82 %). R<sub>f</sub> 0.7 (6:4 EtOAc:hexane);  $\delta$ H (500 MHz, CDCl<sub>3</sub>) 7.32 (t, *J* 8.3 Hz, 1H), 6.99 – 6.91 (m, 2H), 6.91 – 6.85 (m, 1H), 5.69 (s, 2H), 4.70 (d, *J* 2.4, 2H) 4.14 – 4.08 (m, 2H), 3.78 – 3.72 (m, 4H), 3.55 (s, 3H), 2.53 (t, *J* 2.33, 1H), 1.92–1.82 (m, 2H), 1.00 – 0.94 (m, 2H), 0.88 (s, 9H), 0.03 (s, 6H), -0.03 (s, 9H); ESI: m/z 615.37 [M+H]<sup>+</sup>.

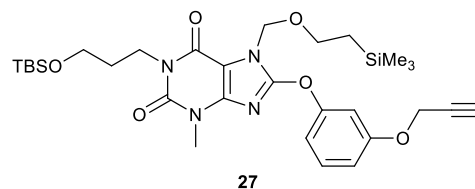

**1-(3-hydroxypropyl)-3-methyl-8-(3-(prop-2-yn-1-yloxy)phenoxy)-7H-purine-2,6-dione 28**

To a solution of 1-(3-((tert-butyldimethylsilyloxy)propyl)-3-methyl-8-(3-(prop-2-yn-1-yloxy)phenoxy)-7-((2-(trimethylsilyl)ethoxy)methyl)purine-2,6-dione **27** (0.90 g, 1.45 mmol) in EtOH (5 mL), concentrated aqueous HCl (1 mL) was added and the resulting solution was heated at reflux for 1 h. The solvents were removed *in vacuo*, the product was extracted using EtOAc (4 x 20 mL) and washed with water (3 x 20 mL) and brine (20 mL). The solution was dried over Na<sub>2</sub>SO<sub>4</sub>, concentrated *in vacuo*, and purified by column chromatography (SiO<sub>2</sub>; 6:4 EtOAc:hexane) to give a white solid (0.16 g, 30 %).  $\delta$ H (500 MHz, CDCl<sub>3</sub>) 7.31 (t, *J* 8.2 Hz, 1H), 7.00 – 6.92 (m, 2H), 6.86 (ddd, *J* 8.2, 2.4, 0.8, 1H), 4.69 (d, *J* 2.4, 2H), 4.18 (t, *J* 6.0, 2H), 3.55 – 3.51 (m, 2H), 3.51 (s, 3H), 2.55 (t, *J* 2.4, 1H), 1.94 – 1.85 (m, 2H);  $\delta$ C (126 MHz, CDCl<sub>3</sub>) 158.6, 155.5, 155.1, 154.1, 151.6, 147.7, 130.3, 112.6, 112.2, 107.0, 103.1, 78.0, 76.1, 58.6, 56.1, 38.2, 30.8, 30.4; ESI: m/z 371.09 [M+H]<sup>+</sup>; ESI-HRMS: calcd. for C<sub>18</sub>H<sub>19</sub>N<sub>4</sub>O<sub>5</sub> [M+H]<sup>+</sup> 371.1350, found 371.1353.

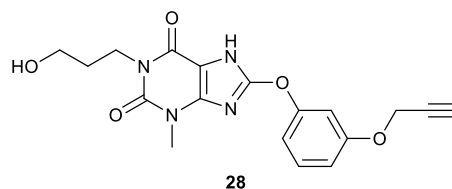

**1-(3-hydroxypropyl)-3-methyl-7-((4-(3-methyldiazirin-3-yl)phenyl)methyl)-8-(3-(prop-2-yn-1-yloxy)phenoxy)purine-2,6-dione (Pico145-DAAlk2) 7**

To a solution of 1-(3-hydroxypropyl)-3-methyl-8-(3-(prop-2-yn-1-yloxy)phenoxy)-7H-purine-2,6-dione **28**, (0.05 g, 0.14 mmol) and Cs<sub>2</sub>SO<sub>4</sub> (0.10 g, 0.28 mmol) in

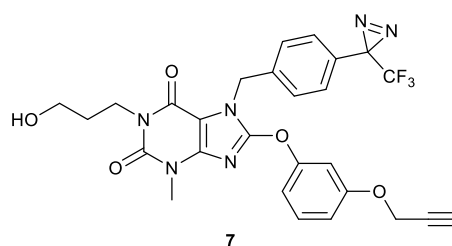

DMF (5 mL), 3-(4-(bromomethyl)phenyl)-3-(trifluoromethyl)diazirine **23** (0.05 g, 0.16 mmol) was added and the solution was stirred at 50 °C overnight to yield a brown solution. The product was poured into water (20 mL) and extracted with EtOAc (4 x 20 mL), washed with water (2 x 20 mL), aqueous LiCl (1 N, 2 x 20 mL) and brine (20 mL), dried over Na<sub>2</sub>SO<sub>4</sub>, concentrated *in vacuo*, and purified by column chromatography (SiO<sub>2</sub>; 6:4 hexane:EtOAc) to yield a white residue (0.058 g, 71 %). R<sub>f</sub> 0.2 (6:4 EtOAc:hexane); δH (501 MHz, CDCl<sub>3</sub>) 7.52 – 7.46 (m, 2H), 7.36 – 7.30 (m, 1H), 7.18 (d, *J* 8.1 Hz, 2H), 6.92 – 6.85 (m, 3H), 5.44 (s, 2H), 4.70 (d, *J* 2.4, 2H), 4.21 – 4.15 (m, 2H), 3.54 – 3.48 (m, 2H), 3.44 (s, 3H), 2.55 (t, *J* 2.4, 1H), 1.94 – 1.85 (m, 2H), hydroxypropyl -*H* not detected; δC (126 MHz, CDCl<sub>3</sub>) 158.8, 155.4, 154.0, 153.5, 151.8, 146.7, 137.6, 130.4, 129.5, 129.0, 127.2, 122.1 (q, *J* 274.7, CF<sub>3</sub>), 112.6, 112.4, 107.1, 103.0, 78.1, 76.1, 58.6, 56.2, 46.8, 37.8, 31.0, 30.2, 28.4 (q, *J* 40.7, C-diazirine); δF (376 MHz, CDCl<sub>3</sub>) -65.2; ESI: m/z 569.09 [M+H]<sup>+</sup>; ESI-HRMS: calcd. for C<sub>27</sub>H<sub>24</sub>F<sub>3</sub>N<sub>6</sub>O<sub>5</sub> [M+H]<sup>+</sup> 569.1755, found 569.1763; HPLC: RT = 3.77 min.

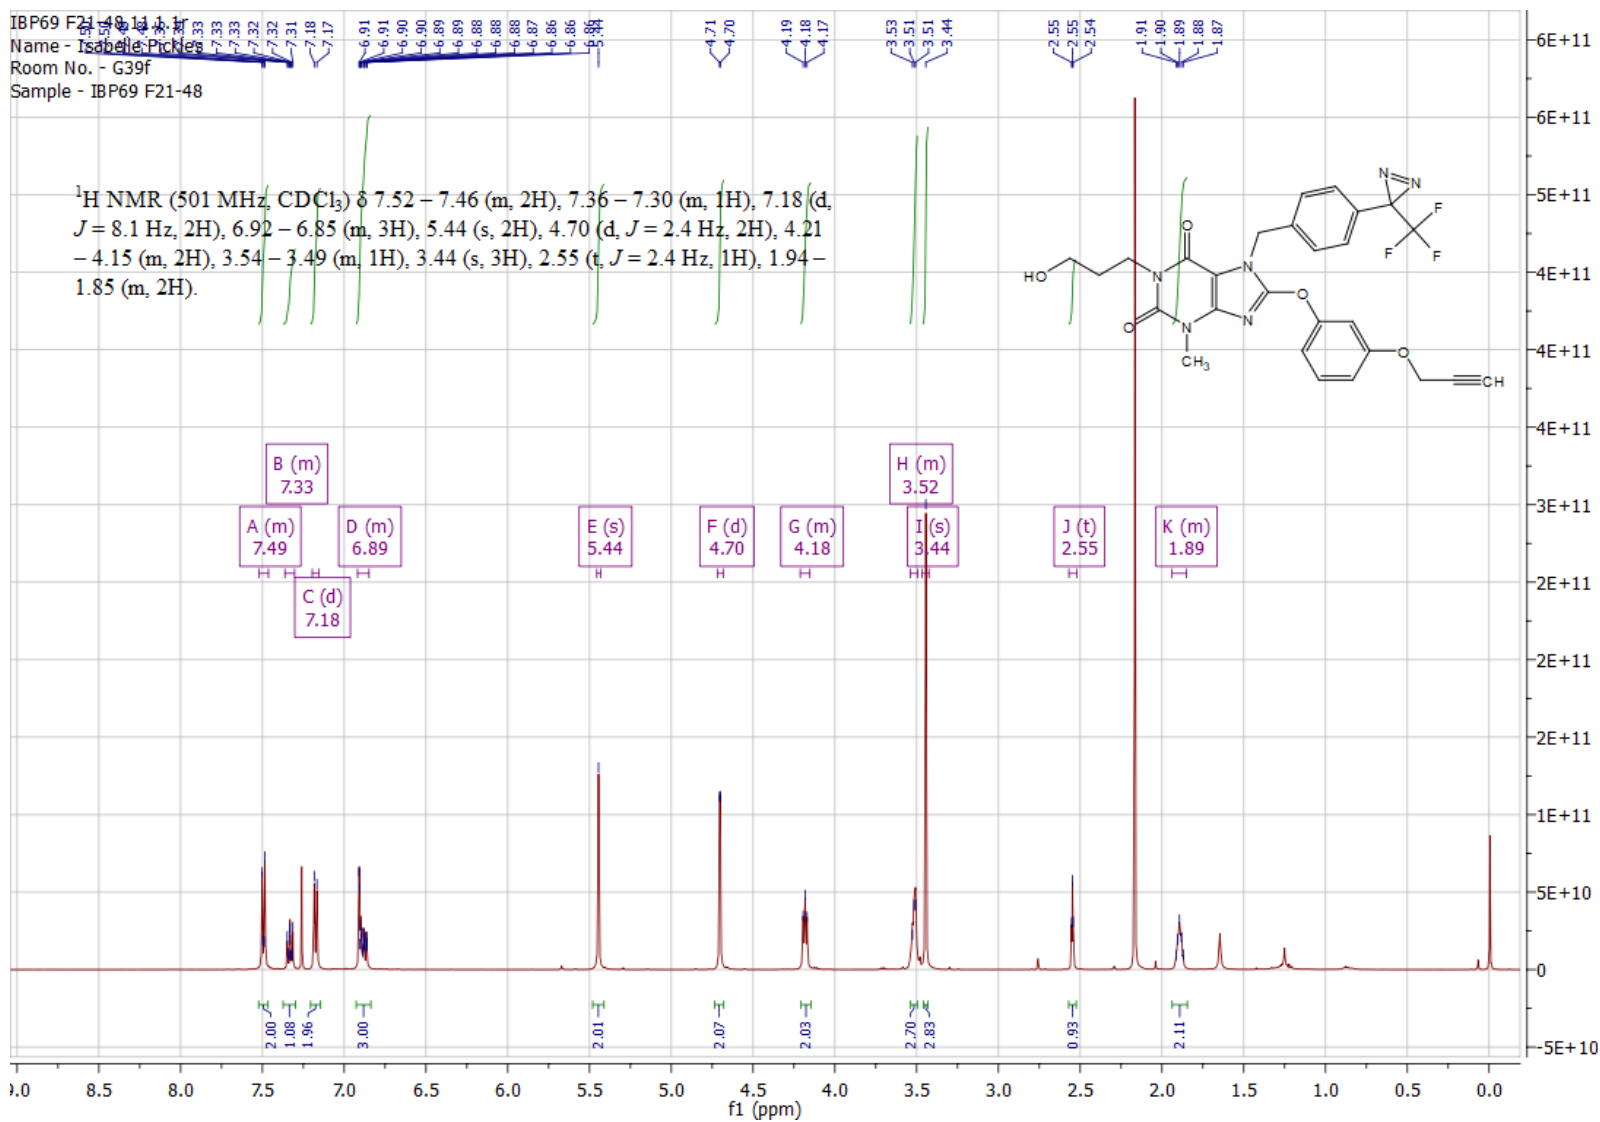

Supplementary Figure 31.  $^1\text{H}$  NMR spectrum of Pico145-DAalk2 7.

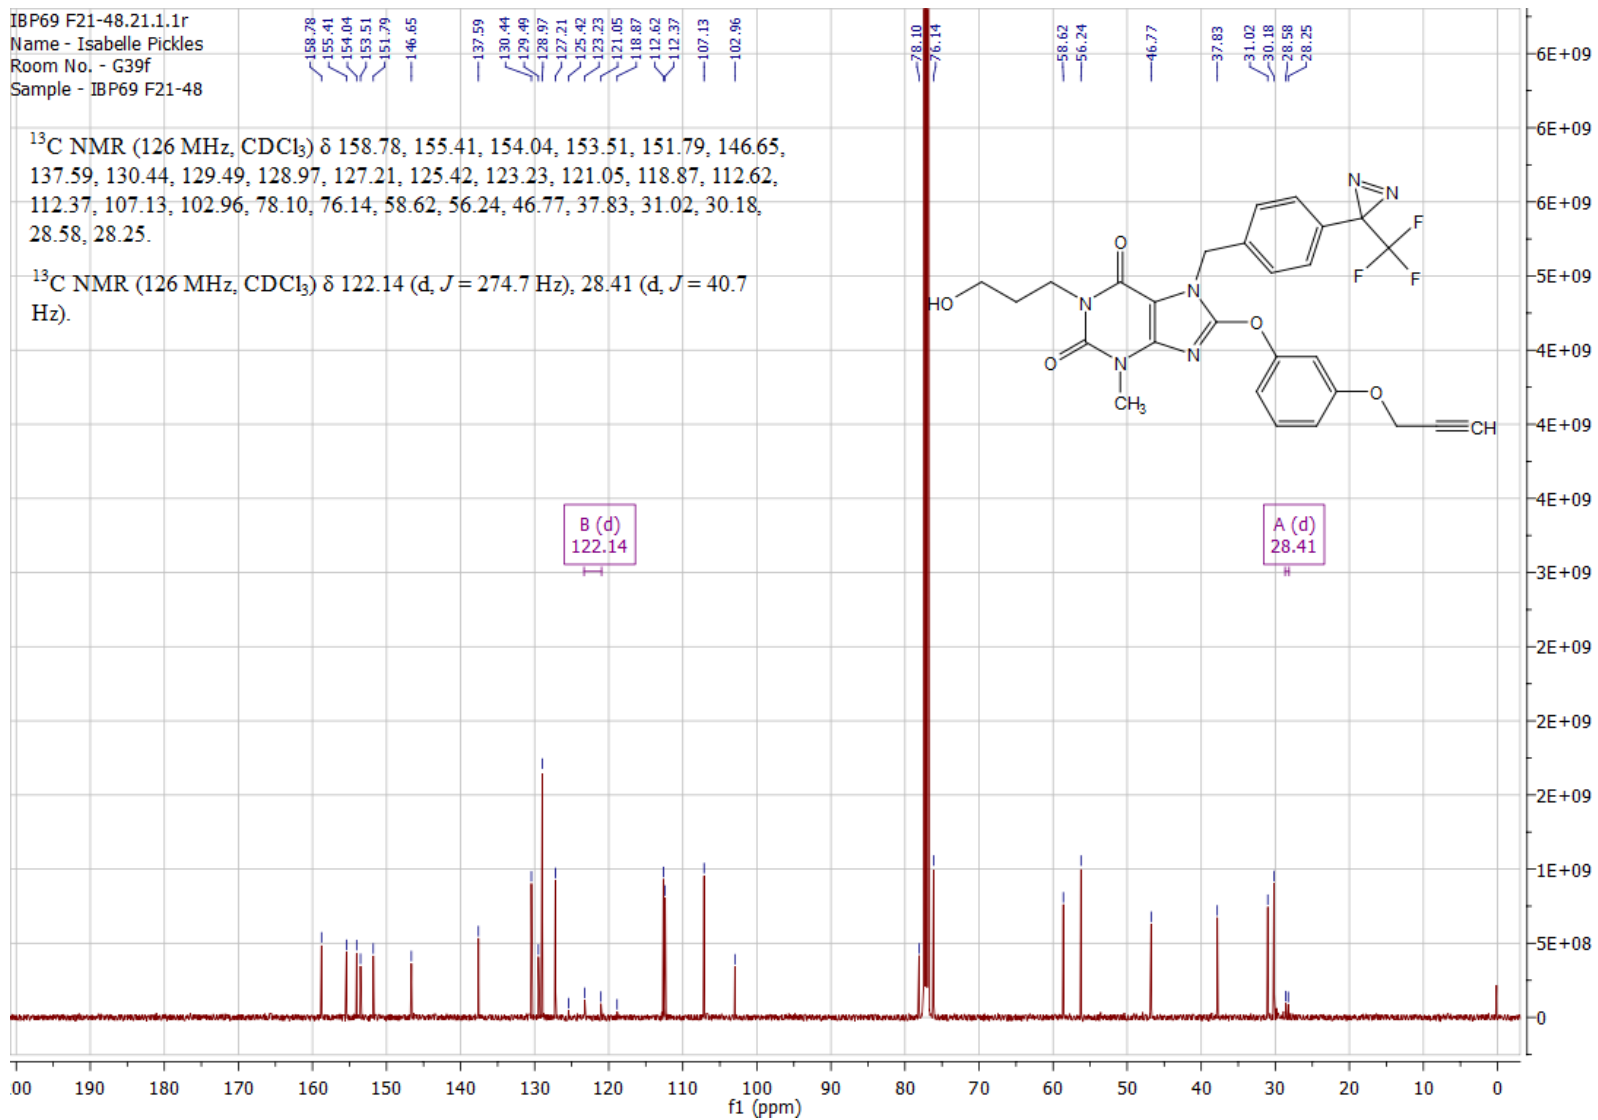

Supplementary Figure 32.  $^{13}\text{C}$  NMR spectrum of Pico145-DAAlk2 7.



Name - Isabelle Pickles  
Room No. - G39f  
Sample - IBP69 F21-48

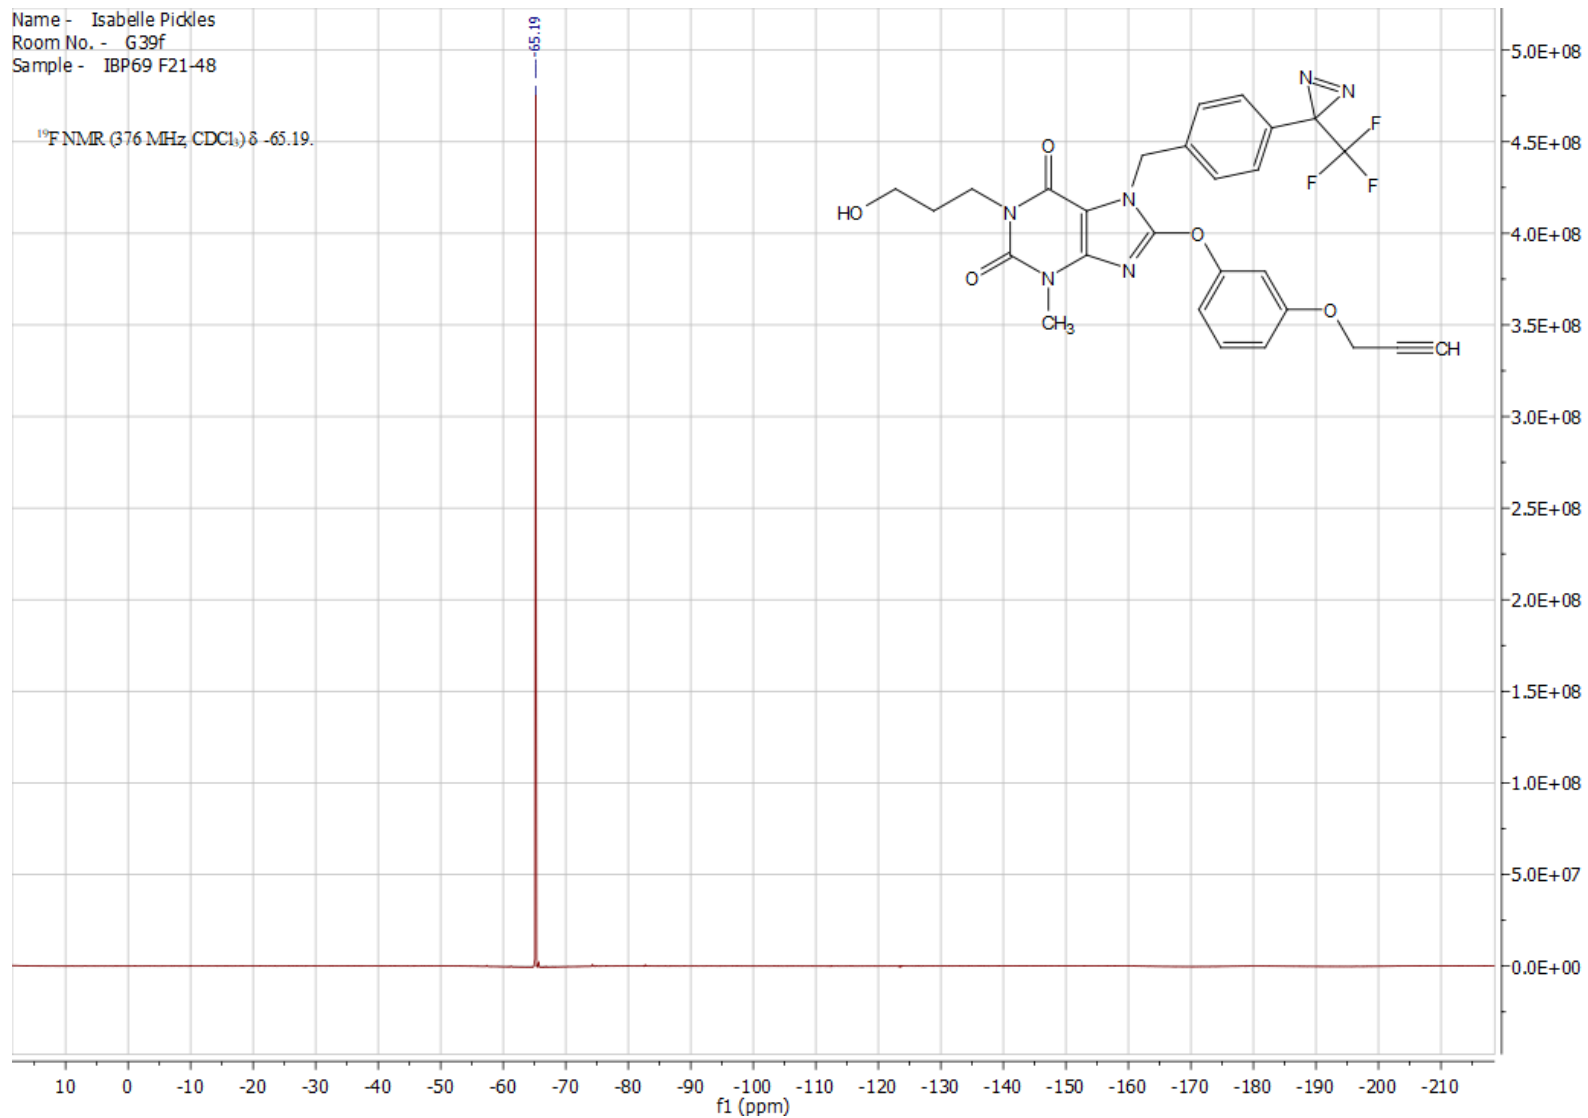

Supplementary Figure 33.  $^{19}\text{F}$  NMR spectrum of Pico145-DAAlk2 7.

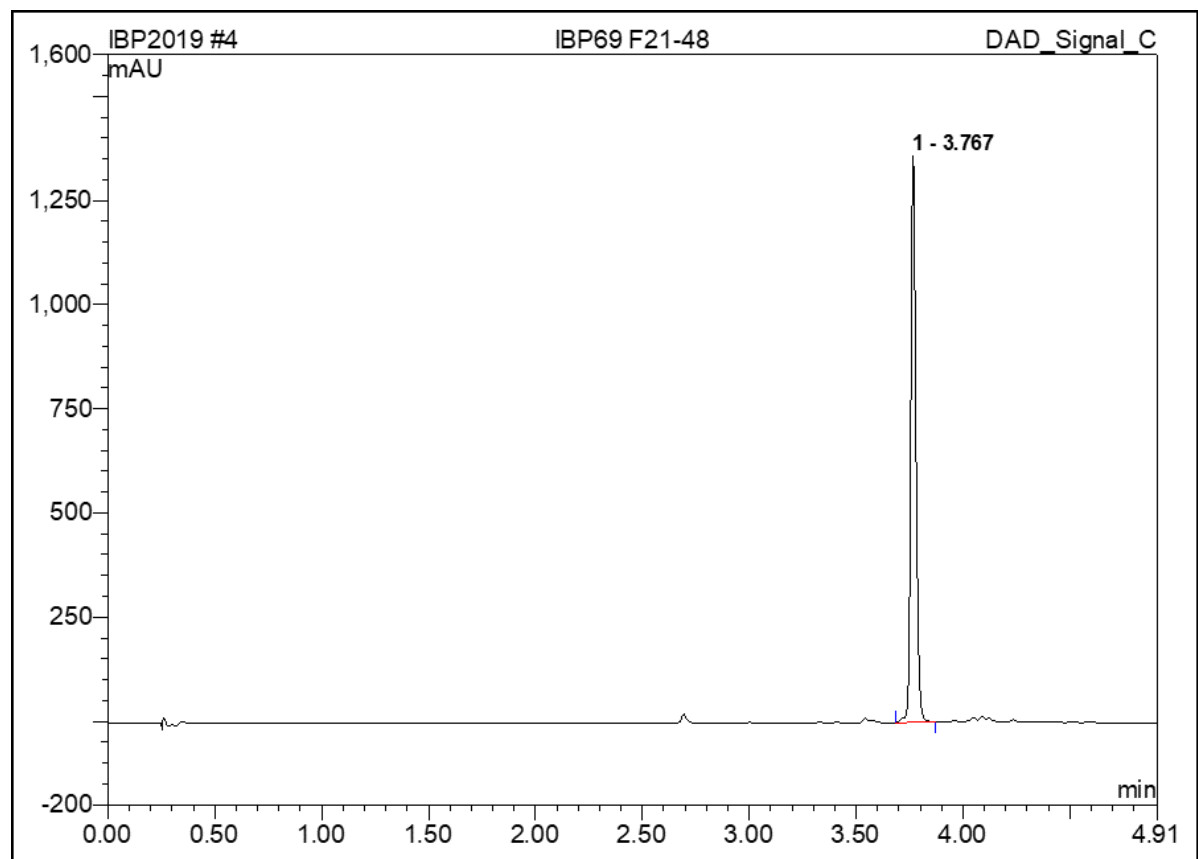

**Supplementary Figure 34.** HPLC chromatogram of Pico145-DAAIk2 7 (MeCN/water 5-95%).

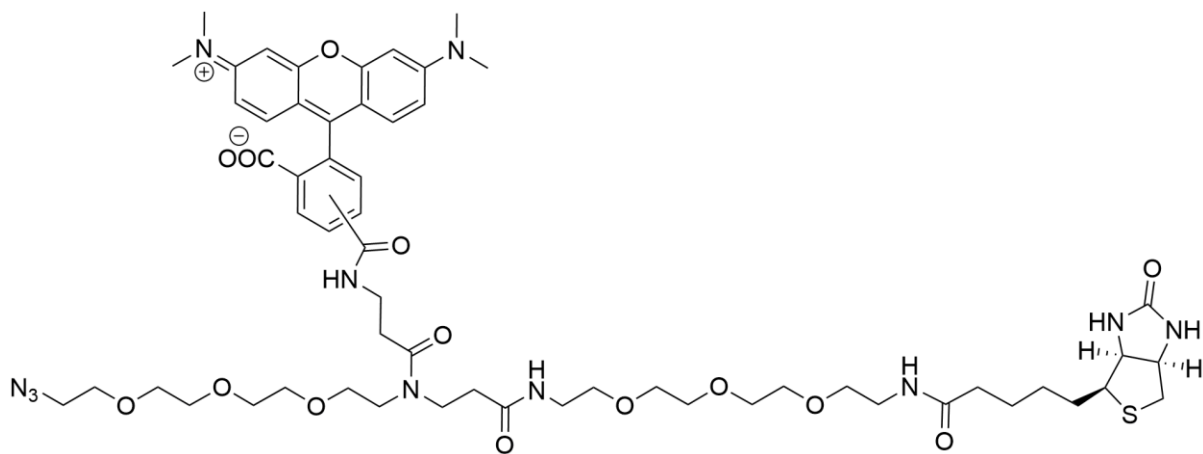

**Supplementary Figure 35. Structure of commercial TAMRA biotin azide from Click Chemistry Tools (Scottsdale, AZ, USA). Taken from <https://clickchemistrytools.com/product/tamra-biotin-azide/> (accessed: 16/02/2020).**

## LED photocrosslinker setup

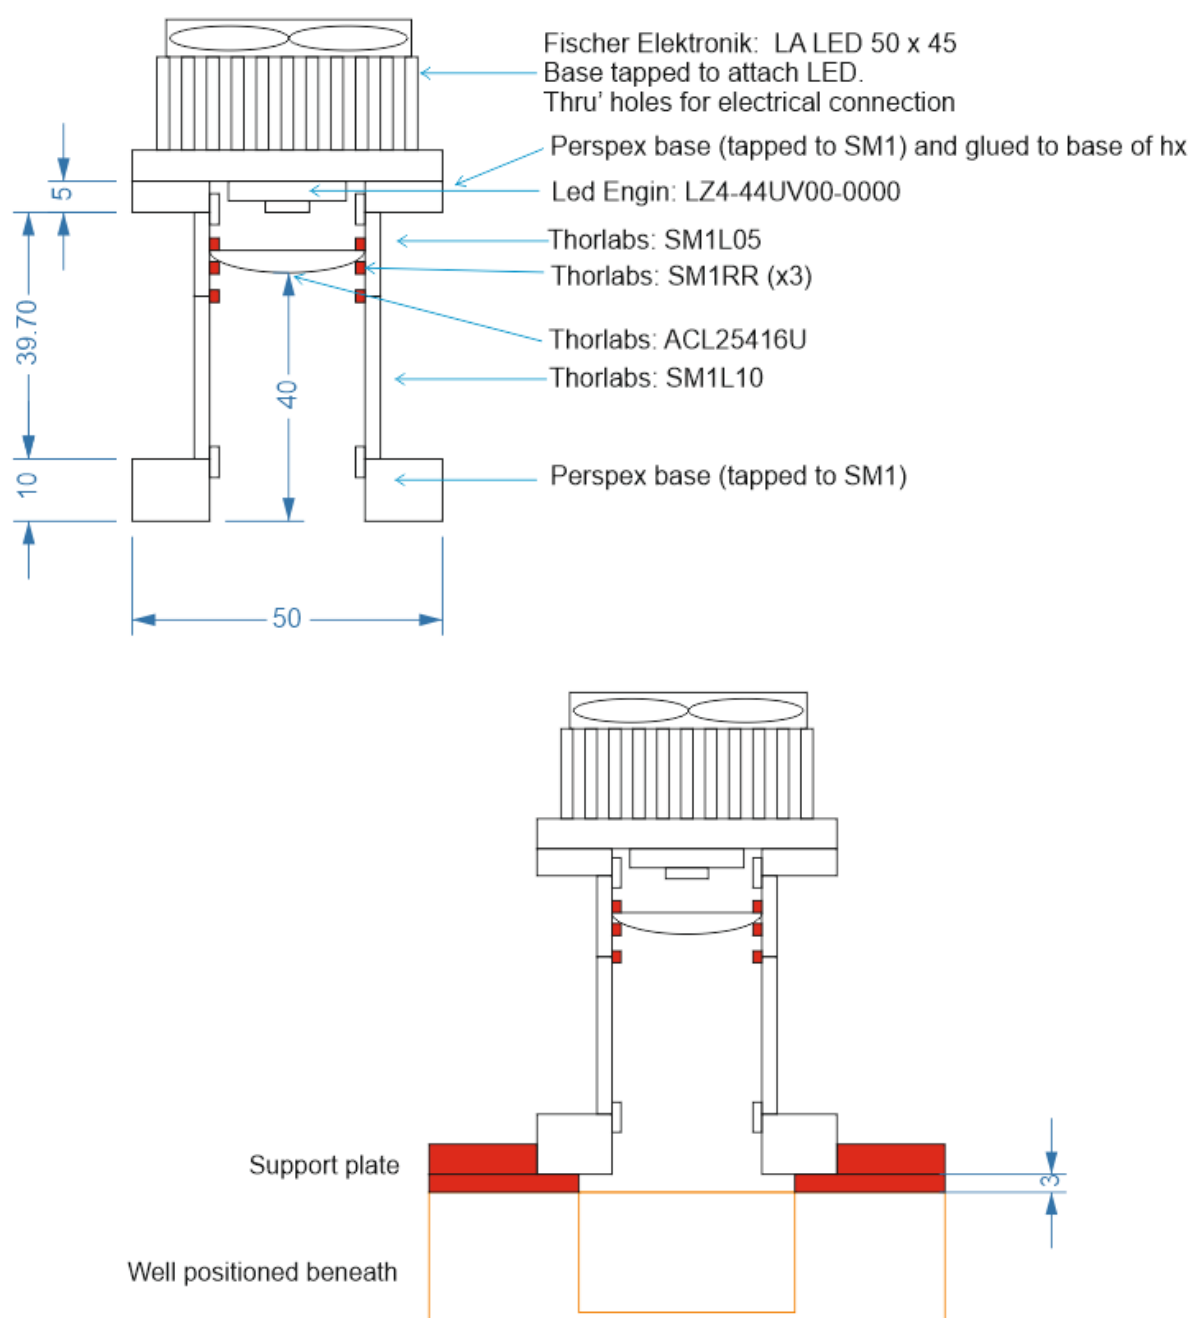

**Supplementary Figure 36.** Schematics of the LED photocrosslinker designed and built for this work. Measurements in mm.

The LED photocrosslinker used in photoaffinity labelling experiments with Pico145-DAAlk2 **7** was based on an earlier model built for irradiation of samples in Eppendorf vials.<sup>10</sup> The design was adapted to allow irradiation of wells in a 6-well plate.

The UV irradiator was built according to Supplementary Figure 34. A fan and pin fin heat exchanger were used to dissipate heat from the UV LED. A retaining Perspex ring, tapped to SM1, was glued to the base of the heat exchanger, allowing connection of an SM1L05 lens tube, in which was positioned a collimating lens held in place with two retaining rings. A third

retaining ring was used to join the upper lens tube to the lower lens tube. The lower lens tube was screwed to a Perspex base ring that was tapped to SM1.

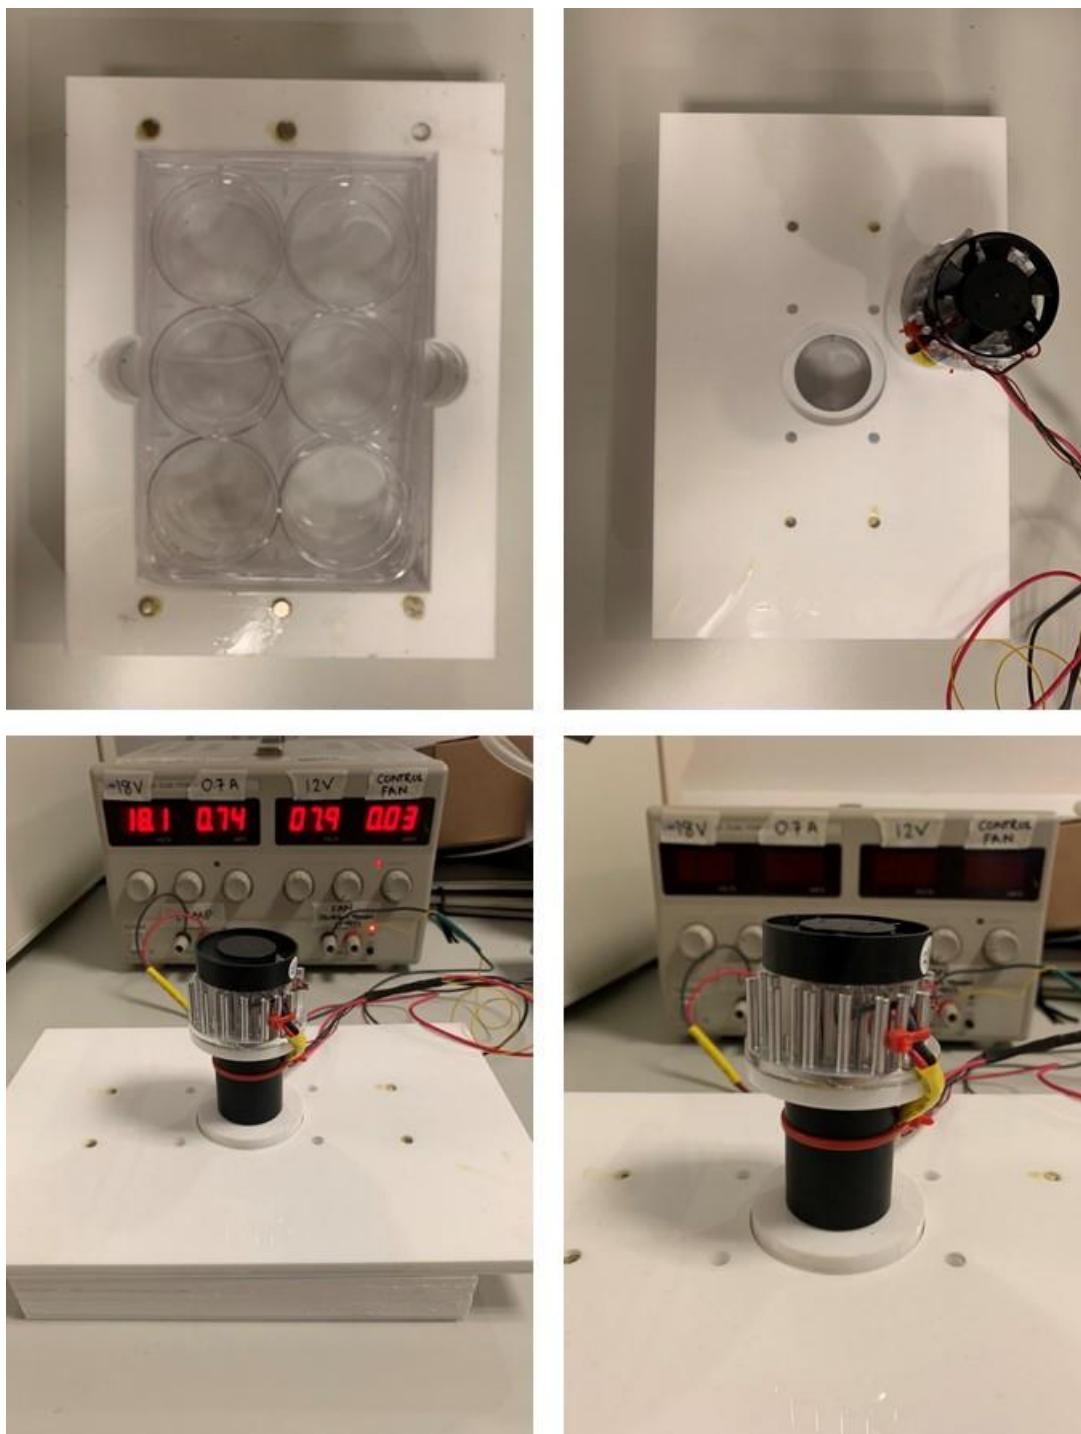

**Supplementary Figure 37.** Pictures of the LED-based photocrosslinker used in this work.

This portable unit could then be positioned on a support plate, with a single opening (allowing verification that the unit was correctly positioned above the well; Supplementary Figure 34). This support plate sat above the wells, contained within a simple light-tight box, laser cut from sheets of Perspex that were then bonded together, such that the support plate sat just above the top of the 6-well plate (without a lid; Supplementary Figure 35). The support plate could

be slid so that the LED sat above any of the well openings, with enough material to prevent light egress. To power the assembly a dual output bench supply was used. The LED was run under voltage control of 18 V, and the fan was run at its nominal 12 V.

## TRPC plasmid sequences used for generation of stable HEK T-REx cell lines

### pcDNA4/TO/TRPC5-SYFP2

blue = hTRPC5

green = SYFP2

GACGGATCGGGAGATCTCCCGATCCCCTATGGTGCACCTCTCAGTACAATCTGCTCTGATGCCGC  
ATAGTTAAGCCAGTATCTGCTCCCTGCTTGTGTGTTGGAGGTCGCTGAGTAGTGCGCGAGCAAA  
ATTTAAGCTACAACAAGGCAAGGCTTGACCGACAATTGCATGAAGAATCTGCTTAGGGTTAGGCC  
TTTTGCGCTGCTTCGCGATGTACGGGCCAGATATACGCGTTGACATTGATTATTGACTAGTTATTA  
ATAGTAATCAATTACGGGGTCATTAGTTCATAGCCCATATATGGAGTTCGCGTTACATAAATTAC  
GGTAAATGGCCCCGCTGGCTGACCGCCCAACGACCCCCGCCATTGACGTCAATAATGACGTAT  
GTTCCCATAGTAACGCCAATAGGGACTTCCATTGACGTCAATGGGTGGAGTATTTACGGTAAAC  
TGCCCACTTGGCAGTACATCAAGTGTATCATATGCCAAGTACGCCCCCTATTGACGTCAATGACG  
GTAAATGGCCCCGCTGGCATTATGCCCAGTACATGACCTTATGGGACTTTCCTACTTGGCAGTAC  
ATCTACGTATTAGTCATCGCTATTACCATGGTGTATGCGGTTTTGGCAGTACATCAATGGGCGTGG  
ATAGCGGTTTGACTCACGGGGATTTCCAAGTCTCCACCCCATTTGACGTCAATGGGAGTTTGT  
GGAACCAAAATCAACGGGACTTTCCAAAATGTCGTAACAACCTCCGCCCATTTGACGCAAATGG  
CGGTAGCGTGTACGGTGGGAGGTCTATATAAGCAGAGCTCTCCCTATCAGTGTAGAGATCTC  
CCTATCAGTGTATAGAGTACGTCGACGAGCTCGTTTAGTGAACCGTCAGATCGCCTGGAGACGCC  
ATCCACGCTGTTTTGACCTCCATAGAAGACACCGGGACCGATCCAGCCTCCGGACTCTAGCGTT  
TAACTTAAGCTTGGTACCGCCACCatggcccaactgtactacaaaagggtcaactactaccgtacagagaccgcatccc  
cctgcaaatgtgagggctgagacagagctctctgcagaggagaaggccttctcaatgctgtggagaaggggactatgccactgtgaagc  
aggccctcaggaggctgagatctactataatgtaacatcaactgcatggacccttggcgaggagtgccctgctcattgccattgagaacga  
gaacctggagatcatggagctactgctgaaccacagcgtgtatgtgggtgatgcattgctctatgccatacgaaggaagtgggtggcgctgtg  
gagcttctgctcagctacaggcgcccagcggagagaagcagggtcccactctgatgatggacacgcagttctgaaatcacaccggacat  
cactcccacatgctggctgcccacaccaacaactacgaaatcatcaaatgcttgcctcaaaaacgggtcactatcccacggccccaccagat  
ccgctgcaactgtgtggagtgtgtctagttcagaggtagacagcctgcgccactctcctccgactgaacatctataaggctctggcaagc  
ccctcactcattgccttatcaagtgaggacccatcctaactgcctcctcctgctgggtgggagctcaaggagctcagcaaggtggagaatgagt  
tcaaggccgagatgaggagctctcagcagtgcaagctcttggcaaaagcctgctggaccaagctcggagctccagggaaactgga gatc  
atcctcaaccatcgagatgaccacagtgaaagcttgaccctcagaagtaccatgacctggccaagttgaaggtggcaatcaaataccacc  
agaaagagtttgtgctcagcccaactgccaacagttgctgccaccctgtggtatgatggctccctggatggcggggaaacactgggtagtc  
aagcttcaacctgcatgaccattgggtcctgtttccatgctgtctatagcctacctgatctcaaccaggagcaacctgggctgttcatcaagaa  
acccttatcaagttatctgccaacagatcctattgacctcctcttatgcttctcctggtctcagcacatgtcaggacagacctatgtac  
aggggctcccccaactgctggtgaatggatgatattgcttgggttctaggttcatttggggtgagattaaggaatgtgggaggtggattact  
gaatacatcatgactggtggaacctgatggattttgcaatgaactccctctacctggaactattccctgaagattAtggcctatgtcaagata  
atggttctcgtccaaggagggaatgggaaatgtggcaccgactctgattgcggaagcactctcgcaatatccaacatttaagttcgttgcgtc  
tcatatccctgttcacagccaactcccacttaggacctgacagatccttgggagcagctgctgctgatacctcaaatcctcttactactgctc  
ggtactactagcttttccaatggactgaaccagcttacttctattatgaaaccagagctatcgatgagcctaacaactgcaaggggatccgat  
gtgagaaacagaacaatgcttctccacgctctttagactcttcagtcactcttctggtctgatttggccttttaaatctatgtcaccaatgtgaa  
agccagacacgaattaccgagttttagtagctaccatggttgaacatacaatgtcatcctcctggtagtgtgctgaacatgctgattgctat  
gatgaacaactcctatcagctattgcccgatcagctgatacagtggaagtttgaaggacgaagctctggatgagttactttgatgaaggtgg  
caccttgcacctccttcaacatcatcccagccccagtcatttctataccttggtaactggttcaacaacacctctgccccaaaagagacc  
tgacggtagacggagaaggcgaacttgagaagttcacagaagcgaactgtgacagcctgatacaaaaatcaattatcaggaagttatc  
aggaatttagcaaaagatgtggctgctatgataaagaattccaaaacacatgagggacttacagaagaaaatttaaggaattaaagcaa  
gacatctcagcttccggtatgaagtgttgcctcttgggaaatgaaaacatccaaggagctttccactagcagcactgaactgtctcagag  
agacgataataatgatggcagtggtggggctcgggccaatccaagagtgctctttaaattaggctgcaagaaaagactgccatgggcc  
acctctcatcagaacctgccaaggtccagtggtgccaaggaaagtcaaaagctgagtcataagcaaacgctcctcatgggtccttctctc  
aagaaactgggtctcctattctcaaatthaatggctcatatgtctgaaccagttcagagccaatgtacacaatttctgatggaattgttcagcagc  
actgtatgtggcaggacatcagatattctcagatggagaaagggaaagcagaggcctgttctcaagtgaatcaaccicagtgggtagaat  
taggtgaagtccaggcgctgctcagagcagtgaaatgccctctagcctgttccagctcttctactgtgcatccagatctgctcctcaattctaa  
acttttagactcctcagaggatgtattgaaactggggagaggctgtgactgtctatgcacaaatggggtgatggacaggaagaacaagtta

caactcgcctcACCGGTGCCAGCGCATCCCGCGGAatggtgagcaagggcgaggagctgtaccgggggtggtgccatc  
ctggtcgagctggacggcgacgtaaacggccacaagttcagcgtgtccggcgagggcgagggcgatgccacctacggaagctgacct  
gaagctgatctgaccaccggcaagctgcccgtgccctggcccaccctcgtgaccacccctgggctacggcgtgagtgcttccccgctacc  
ccgaccacatgaagcagcagcactcttcaagtccgcatcccgaaggctacgtccaggagcgcaccatcttcaaggacgacggcaa  
ctacaagaccgcgaggtgaagttcagggcgacaccctggtgaaccgcatcgagctgaagggcatcgactcaaggagggacggca  
acatcctggggcacaagctggagtacaactacaacagccacaacgtctatatcaccgccaagcagaagaacggcatcaaggccaa  
ctcaagatccgccaacaatcgaggacggcggtgagctcggcgaccactaccagcagaacacccccatcggcgacggccccgctg  
tctgccccgacaaccactacctgagctaccagtccaagctgagcaaaagacccaacgagaagcgcgatcacatggtcctgctggagtctg  
gaccgcccggggatcactctcggcatggacgagctgtacaagtaaTCTAGAGGGCCCGTTTAAACCCGCTGATCAG  
CCTCGACTGTGCCTTCTAGTTGCCAGCCATCTGTTGTTGCCCTCCCCGTCCTTCCCTTGACC  
CTGGAAGGTGCCACTCCCCTGTCCTTTCCTAATAAAATGAGGAAATTGCATCGCATTGTCTGAG  
TAGGTGTCATTCTATTCTGGGGGGTGGGGTGGGGCAGGACAGCAAGGGGGAGGATTGGGAAGA  
CAATAGCAGGCATGCTGGGGATGCGGTGGGCTCTATGGCTTCTGAGGCGGAAAGAACCGCTG  
GGCTCTAGGGGTATCCCCACGCCCCTGTAGCGGCGCATTAAAGCGCGGGGTGTGGTGG  
TTACGCGCAGCGTGACCGCTACACTTGCCAGCGCCCTAGCGCCCGCTCCTTTTCGCTTTCTTCCC  
TTCTTTCTCGCCACGTTTCGCGGCTTTCCCCGTCAAGCTCTAAATCGGGGGCTCCCTTTAGGG  
TTCCGATTTAGTGCTTTACGGCACCTCGACCCCAAAAACTTGATTAGGGTGATGTTTACGCTAG  
TGGGCCATCGCCCTGATAGACGGTTTTTCGCCCTTTGACGTTGGAGTCCACGTTCTTTAATAGTG  
GACTCTTGTTCCAAACCTGGAACAACACTCAACCCTATCTCGGTCTATTCTTTTATTATAAGGGA  
TTTTGCCGATTTTCGGCCTATTGGTTAAAAAATGAGCTGATTTAACAAAAATTTAACGCGAATTAATT  
CTGTGGAATGTGTGTCAGTTAGGGTGTGGAAAGTCCCCAGGCTCCCCAGCAGGCAGAAGTATGC  
AAAGCATGCATCTCAATTAGTCAGCAACCAGGTGTGGAAAGTCCCCAGGCTCCCCAGCAGGCAG  
AAGTATGCAAAGCATGCATCTCAATTAGTCAGCAACCATAGTCCCGCCCCTAACTCCGCCCATCC  
CGCCCCTAACTCCGCCAGTTCCGCCATTCTCCGCCCATGGCTGACTAATTTTTTTTTATTTAT  
GCAGAGGCCGAGGCCGCTCTGCCTCTGAGCTATTCCAGAAGTAGTGAGGAGGCTTTTTTTGGAG  
GCCTAGGCTTTTTGCAAAAAGCTCCCGGGAGCTTGTATATCCATTTTCGGATCTGATCAGCACGTG  
TTGACAATTAATCATCGGCATAGTATATCGGCATAGTATAATACGACAAGGTGAGGAACTAAACC  
ATGGCCAAGTTGACCAGTGCCGTTCCGGTGCTCACCGCGCGGACGTCGCCGGAGCGGTCTGA  
GTTCTGGACCGACCGGCTCGGGTTCTCCCGGGACTTCGTGGAGGACGACTTCGCCGGTGTGGT  
CCGGGACGACGTGACCCTGTTTCATCAGCGCGGTCCAGGACCAGGTGGTGCCGGACAACACCCCT  
GGCCTGGGTGTGGGTGCGCGGCCCTGGACGAGCTGTACGCCGAGTGGTCGGAGGTCTGTGCCA  
CGAACTTCCGGGACGCTCCGGGCCGGCCATGACCGAGATCGGCGAGCAGCCGTGGGGGCGG  
GAGTTCGCCCTGCGCGACCCGGCCGGCAACTGCGTGCATTCGTGGCCGAGGAGCAGGACTG  
ACACGTGCTACGAGATTTTCGATTCCACCGCCGCTTCTATGAAAGGTTGGGCTTCGGAATCGTTT  
TCCGGGACGCCGGCTGGATGATCCTCCAGCGCGGGGATCTCATGCTGGAGTTCCTTCGCCACC  
CCAATTTGTTTTATTGCAGCTTATAATGGTTACAAATAAAGCAATAGCATCACAAATTTACAAATAA  
AGCATTTTTTCACTGCATTCTAGTTGTGGTTTTGTCCAAACTCATCAATGTATCTTATCATGTCTGT  
ATACCGTGCACCTCTAGCTAGCTTGGCGTAATCATGGTCATAGCTGTTTTCTGTGTGAAATTG  
TTATCCGCTCACAATTCACACAACATACGAGCCGGAAGCATAAAGTGTAAGCCTGGGGTGCC  
TAATGAGTGAGCTAACTCACATTAATTGCGTTGCGCTCACTGCCCGCTTTCCAGTCGGGAAACCT  
GTCGTGCCAGCTGCATTAATGAATCGGCCAACGCGCGGGGAGAGGCGGTTTTGCGTATTGGGCG  
CTCTTCCGCTTCTCGCTCACTGACTCGCTGCGCTCGGTCTGTTCCGGCTGCGGCGAGCGGTATCA  
GCTCACTCAAAGGCGGTAATACGGTTATCCACAGAATCAGGGGATAACGCAGGAAAGAATGT  
GAGCAAAAAGGCCAGCAAAAAGGCCAGGAACCGTAAAAAGGCCGCGTTGCTGGCGTTTTTCCATAG  
GCTCCGCCCCCTGACGAGCATCACAAAAATCGACGCTCAAGTCAGAGGTGGCGAAACCCGAC  
AGGACTATAAAGATAACCAGGCGTTTTCCCCTGGAAGCTCCCTCGTGCCTCTCCTGTTCCGACC  
CTGCCGCTTACCGGATACCTGTCCGCTTTTCTCCCTTCGGGAAGCGTGCCGCTTTCTCATAGCT  
CACGCTGTAGGTATCTCAGTTCGGTGTAGGTCGTTCCGCTCCAAGCTGGGCTGTGTGCACGAACC  
CCCCGTTACGCCGACCGCTGCGCCTTATCCGGTAACCTATCGTCTTGAGTCCAACCCGGTAAGA  
CACGACTTATCGCCACTGGCAGCAGCCACTGGTAACAGGATTAGCAGAGCGAGGTATGTAGGC  
GGTGCTACAGAGTTCTTGAAGTGGTGGCCTAACTACGGCTACACTAGAAGAACAGTATTTGGTAT  
CTGCGCTCTGCTGAAGCCAGTTACCTTCGGAAAAAGAGTTGGTAGCTCTTGATCCGGCAAAACAA  
ACCACCGCTGGTAGCGGTTTTTTTTGTTTGAAGCAGCAGATTACGCGCAGAAAAAAGGATCTCA  
AGAAGATCCTTTGATCTTTTCTACGGGGTCTGACGCTCAGTGGAACGAAAACCTCACGTTAAGGGA  
TTTTGGTCATGAGATTATCAAAAAGGATCTTACCTAGATCCTTTTAAATTAATAAATGAAGTTTTAA  
ATCAATCTAAAGTATATATGAGTAACTTGGTCTGACAGTTACCAATGCTTAATCAGTGAGGCACC  
TATCTCAGCGATCTGTCTATTTTCGTTTCATCCATAGTTGCCTGACTCCCCGTCGTGTAGATAACTAC  
GATACGGGAGGGCTTACCATCTGGCCCCAGTGCTGCAATGATACCGCGAGACCCACGCTCACC  
GGCTCCAGATTTATCAGCAATAAACCAGCCAGCCGGAAGGGCCGAGCGCAGAAGTGGTCTGC  
AACTTTATCCGCCTCCATCCAGTCTATTAATTGTTGCCGGGAAGCTAGAGTAAGTAGTTCGCCAG

TTAATAGTTTGCACGCTCGTGGTGTACAGGCATCGTGGTGTACGCTCGTGGTGGT  
ATGGCTTCATTAGCTCCGGTCCCAACGATCAAGGCGAGTTACATGATCCCCATGTTGTGCAA  
AAAAGCGGTTAGCTCCTTCGGTCCCTCCGATCGTTGTGAGAAGTAAGTTGGCCGAGTGTATCAC  
TCATGGTTATGGCAGCACTGCATAATTCTTACTGTCATGCCATCCGTAAGATGCTTTTCTGTGA  
CTGGTGAAGTCAACCAAGTCAATTCTGAGAATAGTGTATGCGGCGACCGAGTTGCTCTTGCCC  
GGCGTCAATACGGGATAATACCGCGCCACATAGCAGAACTTTAAAAGTGTCTCATCATTGGAAAAC  
GTTCTTCGGGGCGAAAACCTCTCAAGGATCTTACCGCTGTTGAGATCCAGTTCGATGTAACCCACT  
CGTGACCCAACTGATCTTCAGCATCTTTTACTTTACCAGCGTTTCTGGGTGAGCAAAAACAGG  
AAGGCAAAATGCCGCAAAAAGGAATAAGGGCGACACGGAAATGTTGAATACTCATACTCTTCC  
TTTTCAATATTATTGAAGCATTTATCAGGGTATTGTCTCATGAGCGGATACATATTTGAATGTAT  
TTAGAAAATAAACAATAGGGGTTCCGCGCACATTTCCCCGAAAAGTGCCACCTGACGTC

**pcDNA4/TO/TRPC4-SYFP2**

blue = hTRPC4β

green = SYFP2

GACGGATCGGGAGATCTCCCGATCCCCTATGGTGCCTCTCAGTACAATCTGCTCTGATGCCCG  
ATAGTTAAGCCAGTATCTGCTCCCTGCTTGTGTGTTGGAGGTCGCTGAGTAGTGCGCGAGCAA  
ATTTAAGCTACAACAAGGCAAGGCTTGACCGACAATTGCATGAAGAATCTGCTTAGGGTTAGGCG  
TTTTGCGCTGCTTCGCGATGTACGGGCCAGATATACGCGTTGACATTGATTATTGACTAGTTATTA  
ATAGTAATCAATTACGGGGTCAATTAGTTCATAGCCCATATATGGAGTTCGCGTTACATAACTTAC  
GGTAAATGGCCCGCCTGGCTGACCGCCCAACGACCCCGCCATTGACGTCAATAATGACGTAT  
GTTCCCATAGTAACGCCAATAGGGACTTTCCATTGACGTCAATGGGTGGAGTATTTACGGTAAAC  
TGCCCACTTGGCAGTACATCAAGTGTATCATATGCCAAGTACGCCCCCTATTGACGTCAATGACG  
GTAAATGGCCCGCCTGGCATTATGCCCAGTACATGACCTTATGGGACTTTCTACTTGGCAGTAC  
ATCTACGTATTAGTCATCGCTATTACCATGGTGTATGCGTTTTGGCAGTACATCAATGGGCGTGG  
ATAGCGGTTTACTCACGGGGATTTCCAAGTCTCCACCCATTGACGTCAATGGGAGTTTGT  
GGAACCAAATCAACGGGACTTTCCAAAATGTCGTAACAACCTCCGCCCATGACGCAAATGGG  
CGGTAGGCGTGTACGGTGGGAGGTCTATATAAGCAGAGCTCTCCCTATCAGTGATAGAGATCTC  
CCTATCAGTGATAGAGATCGTCGACGAGCTCGTTTAGTGAACCGTCAGATCGCCTGGAGACGCC  
ATCCACGCTGTTTTGACCTCCATAGAAGACACCGGGACCGATCCAGCCTCCGGACTCTAGCGTT  
TAACTTAAGCTTGGTACCGCCACCatggctcagttctattacaaaagaatgtaaatgctccctatagagaccgcatccctcta  
aggatagtaagagcagaatcagaactctcgccatcagaaaaagcctacttgaatgctgtggaaaagggagattatgccagtgcaagaat  
ccctagaggaagctgaaatttttaaatcaatattaattgcatgctctcggagaactgctcctcattgcaattgaaatgagaacttg  
gagctcatcgaactactttaaagctttaaagctgctgtagatgctctattacatgctatcagaaaagaagctgctgagctgtgagctgtattg  
aaccacaaaaaacctagtggaagaaaacaggtgctcctatactccttgataagcagttctgaattcactccagacattacaccaatcattt  
ggcagcccatacaataaattatgagataataaaactctggttcagaaaggagctcagtgctcagccccacagaggtccgctgtaactgtgtg  
gaaatgctgctcagttcagatgtggacagcctcctcagctcagctcagactcaacatctacaaggccttgccagtcctctcattgact  
gtcaagcgaagatcctttctcacagccttcagtttaagttggaaactcaggaactgagcaaggtggaaaatgaattcaagctggagatgaa  
gagctgtcacggcagtgcaacaattgctaaggacactggtatcagacgagagaagttccagagaactggaaatcattctaattaccgagat  
gacaatagctctatagaagaacaagaatgtaaatgatctgcaagactaaaattggccattaagttaccgtcaaaaagagttgtgcccagccc  
aattgtcaacagctgctggcatctcgtggtacgatgagttccaggctggaggagaagacactgggagtgagatggtgacatggttcataa  
taggactcttttctgctctctgctgctacctgatagctcccaaaagcccacttggactgttcatcaggaagccattatcaagttatctgccac  
acagcctcctatttgactttttgctcctgctgctgctgctcctcagcacatcgacaggtcagactgaaacaggcaaggtccaccaccaaccatcg  
tcgagtgatgatattaccgtgggtcctggctcatatggggagaaataaacagatgtgggatggcgactcaggactacatccatgattgg  
tggaatcaatggacttgaatgaactcctataattagcaacaatccttgaaaattgttcattgtaaagtacagtccttaattccagagaa  
tcatgggacatgtggcatcccactctggtggcagaggttatttctgattgcaaacatctcagttctcgtctgatctcactgttactgcaaattc  
tcactgggacctctgcaaatatctctggaagaatgctcctggacatttgaagttctattcatatactgctgtgtgctagcatttgcaaatggc  
ctaatcaattgtactctattatgaagaaacgaaagggtaacctgcaaaagcagataagatgtaaaagcagaataatgatttcaacgttatt  
gagacactgcagtcctgttttgtaaatattggctcatcaattatattgaccaatgtcaaaagcagacatgaattactgagttgtgtggtgcc  
accatgtttgggacatacaatgtcatctcctggtgttactcaacatgtaaatagctatgatgaataattctaccaactgattgctgaccatgag  
atatagaatggaaattgacgcaacaagcttggatgagttttgaagaaggaggtactctgcctactcctcaatgtcatcccagacccca  
agtctctctggtacctgatcaaatggatctggacacactgtgcaagaaaaagatgagaagaaagccagaaagtttggacaatagggagg  
cgagctgctgataactgagaagacatccaataccaagaagtatgaggaacctggtgaagcgatacgttctgcaatgattagagatgct  
aaaactgaagaaggcctgaccgaagagaacttaaggaactaaagcaagacatttctagttccgcttgaagctcctgggattactaagagga  
agcaacttccacaatacaatctgcgaatgctcgaaggagcttcaaatcggcagactcagatgaaaagagtgatagcgaagaagaag  
ttgctgtcaacaggctgcaggaccactgagagaaaattcaactggaatctcgaggattagcttcacggggtagcctgagcattcccgtctc



agtgaacaatgtgttagtagaccatagagaaaggaatacggacacactggggttacaggtaggaaagagagtgtgccattcaagtcag  
agaaggtggtggtgaggacacgggtcctataataccaaaggagaacatgcaaaagaagaggactctagtagactatgatctaaacct  
cccagacacagtcacccacgaagattacgtgaccacaagattgACCGGTGCCAGCGCATCCCGCGGAatggtgagcaag  
ggcgaggagctgtaccggggtggtcccacctctggtcagctggacggcgacgtaaacggccacaagttcagcgtgtccggcgagggc  
gagggcgatgccacctacggcaagctgacctgaagctgatctgaccaccggcaagctgccctgcccacccctgtgaccacc  
ctgggctacggcgtgagctctcgcccgtaccccaccacatgaagcagcagcactcttcaagtcgccatgcccgaaggctacgtcca  
ggagcgcaccatcttcaaggacgacggcaactacaagaccgcgccgaggtgaagttcagggcgacaccctggtgaaccgcatcg  
agctgaagggatcgcactcaaggaggacggcaacatcctgggcacaaagctggagfacaactacaacagccacaacgtctatatcaccg  
ccgacaagcagaagaacggcatcaaggccaactcaagatccgccacaacatcgaggacggcgccgtgacgtcgcggaccactacca  
gcagaacacccccatggcgacggccccgtgctgctgcccgacaaccactacctgagctaccagctcaagctgagcaaaagaccccaacg  
agaagcgcgatcacatggtcctgctggagttcgtgaccgcccggggatcactctcggcatggacgagctgtacaagTAATCTAGAG  
GGCCCGTTTTAAACCCGCTGATCAGCCTCGACTGTGCCTTCTAGTTGCCAGCCATCTGTTGTTTGC  
CCCTCCCCCGTGCCTTCTTGACCCTGGAAGGTGCCACTCCCCTGTCCTTTCTAATAAAAATGA  
GGAAATTGCATCGCATTGTCTGAGTAGGTGTCATTCTATTCTGGGGGTGGGGTGGGGCAGGAC  
AGCAAGGGGGAGGATTGGGAAGACAATAGCAGGCATGCTGGGGATGCGGTGGGCTCTATGGCT  
TCTGAGGCGGAAAGAACCAGCTGGGGCTCTAGGGGTATCCCCACGCGCCCTGTAGCGGCGCA  
TTAAGCGCGGCGGGTGTGGTGGTTACGCGCAGCGTGACCCTACACTTGCCAGCGCCCTAGCG  
CCCGCTCCTTTTCGCTTCTTCCCTTCTTCTCGCCACGTTTCGCCGGCTTTCCCGGTCAAGCTCT  
AAATCGGGGGCTCCCTTTAGGGTCCGATTTAGTGCTTTACGGCACCTCGACCCCAAAAACTTG  
ATTAGGGTGATGGTTCACGTAGTGGGCCATCGCCCTGATAGACGGTTTTTTCGCCCTTTGACGTT  
GGAGTCCACGTTCTTAATAGTGGACTCTTGTTCCAAACTGGAACAACACTCAACCCTATCTCGG  
TCTATTCTTTTATTTATAAGGGATTTTGGCGATTTTCGGCCTATTGGTTAAAAAATGAGCTGATTTA  
ACAAAAATTTAACCGGAATTAATTCTGTGGAATGTGTGTCAGTTAGGGTGTGGAAAGTCCCAGG  
CTCCCCAGCAGGCAGAAGTATGCAAAGCATGCATCTCAATTAGTCAGCAACCAGGTGTGGAAAG  
TCCCCAGGCTCCCCAGCAGGCAGAAGTATGCAAAGCATGCATCTCAATTAGTCAGCAACCATAG  
TCCCGCCCCTAACTCCGCCATCCCGCCCCTAACTCCGCCAGTTCCGCCATTCTCCGCCCA  
TGGCTGACTAATTTTTTTTATTTATGCAAGAGGCCGAGGCCGCCTCTGCCTCTGAGCTATTCCAGA  
AGTAGTGAGGAGGCTTTTTTGGAGGCCTAGGCTTTTTGCAAAAAGCTCCCGGGAGCTTGTATATC  
CATTTTCGGATCTGATCAGCACGTGTTGACAATTAATCATCGGCATAGTATATCGGCATAGTATAA  
TACGACAAGGTGAGGAACATAACCATGGCCAAGTTGACCAGTGCCGTTCCGGTGCTCACCGCGC  
GCGACGTGCGCGGAGCGGTGCGAGTTCTGGACCGACCGGCTCGGGTTCTCCCGGGACTTCGTG  
GAGGACGACTTCGCCGGTGTGGTCCGGGACGACGTGACCCTGTTTCATCAGCGCGGTCCAGGAC  
CAGGTGGTGGCGGACAACACCCTGGCCTGGGTGTGGGTGCGCGGCCTGGACGAGCTGTACGC  
CGAGTGGTGGAGGTGCTGTCCACGAACCTCCGGGACGCCTCCGGGCCGGCCATGACCGAGAT  
CGGCGAGCAGCCGTGGGGGCGGGAGTTTCGCCCTGCGCGACCCGGCCGCAACTGCGTGCAT  
TCGTGGCCGAGGAGCAGGACTGACACGTGCTACGAGATTTTCGATTCCACCAGCCCTTCTATGA  
AAGTTGGGCTTCGGAATCGTTTTCCGGGACCGCGCTGGATGATCCTCCAGCGCGGGGATCT  
CATGCTGGAGTTCTTCGCCACCCCACTTGTATTGAGCTTATAATGGTTACAAATAAAGCAA  
TAGCATCACAAATTTACAAATAAAGCATTTTTTTCACTGCATTCTAGTTGTGGTTTTGTCCAAACTC  
ATCAATGTATCTTATCATGTCTGTATAACCGTGCACCTCTAGCTAGAGCTTGGCGTAATCATGGTCA  
TAGCTGTTTTCTGTGTGAAATTGTTATCCGCTCACAATTCACACAACATACGAGCCGGAAGCAT  
AAAGTGTAAGCCTGGGGTGCCTAATGAGTGAGCTAACTCACATTAATTGCGTTGCGCTCACTGC  
CCGCTTTCCAGTCGGGAAACCTGTCGTGCCAGCTGCATTAATGAATCGGCCAACGCGCGGGGA  
GAGGCGTTTTGCGTATTGGGCGCTCTTCCGCTTCTCGCTCACTGACTCGCTGCGCTCGGTCTG  
TCGGCTGCGGCGAGCGGTATCAGCTCACTCAAAGGCGGTAATACGGTTATCCACAGAATCAGGG  
GATAACGCAGGAAAGAACATGTGAGCAAAGGCCAGCAAAGGCCAGGAACCGTAAAAAGGCC  
GCGTTGCTGGCGTTTTTCCATAGGCTCCGCCCCCTGACGAGCATCACAAAATCGACGCTCAA  
GTCAGAGGTGGCGAAACCCGACAGGACTATAAAGATACCAGGCGTTTCCCCCTGGAAGCTCCCT  
CGTGCGCTCTCCTGTTCCGACCCTGCCGCTTACCGGATACCTGTCCGCCTTTCTCCCTTCGGGA  
AGCGTGGCGCTTCTCATAGCTCACGCTGTAGGTATCTCAGTTCCGGTGTAGGTGCTTCGCTCCA  
AGCTGGGCTGTGTGCACGAACCCCGTTACGCCGACCGCTGCGCCTTATCCGGTAACATC  
GCTTTGAGTCCAACCCGGTAAGACACGACTTATCGCCACTGGCAGCAGCCACTGGTAACAGGAT  
TAGCAGAGCGAGGTATGTAGGCGGTGCTACAGAGTTCTTGAAGTGGTGGCCTAACTACGGCTAC  
ACTAGAAGAACAGTATTTGGTATCTGCGCTCTGCTGAAGCCAGTTACCTTCGGAAAAAGAGTTGG  
TAGCTCTTGATCCGGCAAACAACACCAGCTGGTAGCGGTTTTTTTTGTTTGCAAGCAGCAGATTA  
CGCGCAGAAAAAAGGATCTCAAGAAGATCCTTTGATCTTTTTCTACGGGGTCTGACGCTCAGTGG  
AACGAAAACCTCACGTTAAGGGATTTTGGTCATGAGATTATCAAAAAGGATCTTACCTAGATCCTT  
TTAAATTAATAAATGAAGTTTTAAATCAATCTAAAGTATATATGAGTAACTTTGGTCTGACAGTTACC  
AATGCTTAATCAGTGAGGCACCTATCTCAGCGATCTGTCTATTTGTTTCATCCATAGTTGCCTGAC  
TCCCGTCTGTAGATAACTACGATACGGGAGGGCTTACCATCTGGCCCCAGTGCTGCAATGAT

ACCGCGAGACCCACGCTACCGGCTCCAGATTTATCAGCAATAAACCAGCCAGCCGGAAGGGC  
CGAGCGCAGAAGTGGTCCTGCAACTTTATCCGCCTCCATCCAGTCTATTAATTGTTGCCGGGAA  
GCTAGAGTAAGTAGTTCGCCAGTTAATAGTTTGCGCAACGTTGTTGCCATTGCTACAGGCATCGT  
GGTGTACAGCTCGTTCGTTTGGTATGGCTTCATTAGCTCCGGTTCCTCAACGATCAAGGCGAGTT  
ACATGATCCCCATGTTGTGCAAAAAGCGGTTAGCTCCTTCGGTCCCTCCGATCGTTGTGAGAAG  
TAAGTTGGCCGAGTGTATCACTCATGGTTATGGCAGCACTGCATAATTCTCTTACTGTCATGC  
CATCCGTAAGATGCTTTTCTGTGACTGGTGAGTACTCAACCAAGTCATTCTGAGAATAGTGTATG  
CGGCGACCGAGTTGCTCTTGCCCGGCGTCAATACGGGATAATACCGCGCCACATAGCAGAACTT  
TAAAAGTGCTCATCATTGGAAAACGTTCTTCGGGGCGAAAACCTCTCAAGGATCTTACCGCTGTTG  
AGATCCAGTTCGATGTAACCCACTCGTGCACCCAACCTGATCTTCAGCATCTTTTACTTTACCAG  
CGTTTCTGGGTGAGCAAAAACAGGAAGGCAAAAATGCCGCAAAAAGGGAATAAGGGCGACACG  
GAAATGTTGAATACTCATACTCTTCTTTTCAATATTATTGAAGCATTATCAGGGTTATTGTCTC  
ATGAGCGGATACATATTTGAATGTATTTAGAAAAATAAACAAATAGGGGTTCCGCGCACATTTCC  
CGAAAAGTGCCACCTGACGTC

### pcDNA4/TO/TRPC5-TRPC1

blue = hTRPC5

green = hTRPC1

GACGGATCGGGAGATCTCCCGATCCCCTATGGTGCCTCTCAGTACAATCTGCTCTGATGCCGC  
ATAGTTAAGCCAGTATCTGCTCCCTGCTTGTGTGTTGGAGGTCGCTGAGTAGTGCGCGAGCAAA  
ATTTAAGCTACAACAAGGCAAGGCTTGACCGACAATTGCATGAAGAATCTGCTTAGGGTTAGGCG  
TTTTGCGCTGCTTCGCGATGTACGGGCCAGATATACGCGTTGACATTGATTATTGACTAGTTATTA  
ATAGTAATCAATTACGGGGTTCATTAGTTCATAGCCCATATATGGAGTTCGCGTTACATAAATTAC  
GGTAAATGGCCCGCCTGGCTGACCGCCCAACGACCCCGCCATTGACGTCAATAATGACGTAT  
GTTCCCATAGTAACGCCAATAGGGACTTTCATTGACGTCAATGGGTGGAGTATTTACGGTAAAC  
TGCCCACTTGGCAGTACATCAAGTGTATCATATGCCAAGTACGCCCCCTATTGACGTCAATGACG  
GTAAATGGCCCGCCTGGCATTATGCCAGTACATGACCTTATGGGACTTTCTACTTGGCAGTAC  
ATCTACGTATTAGTCATCGCTATTACCATGGTGTATGCGGTTTTGGCAGTACATCAATGGGCGTGG  
ATAGCGGTTTGACTCACGGGGATTTCCAAGTCTCCACCCATTGACGTCAATGGGAGTTTGT  
GGAACCAAAATCAACGGGACTTTCCAAAATGTGTAACAACCTCCGCCCATTTGACGCAAATGGG  
CGGTAGGCGTGTACGGTGGGAGGTCTATATAAGCAGAGCTCTCCCTATCAGTGATAGAGATCTC  
CCTATCAGTGATAGAGATCGTCGACGAGCTCGTTTAGTGAACCGTCAGATCGCCTGGAGACGCC  
ATCCACGCTGTTTTGACCTCCATAGAAGACACCGGGACCGATCCAGCCTCCGGACTCTAGCGTT  
TAACTTAAGCTTGGTACCGCCACCatggccaactgtactcaaaaagggtcaactactaccgtacagagaccgcatccc  
cctgcaaatgtgagggctgagacagagctctctgcagaggagaaggccttctcaatgtctgaggagaaggggactatgccactgtgaagc  
aggccttcaggaggctgagatctactataatgttaacatcaactgcatggacccttggccggagtgccctgtcattgccattgagaacga  
gaacctggagatcatggagctgctgaaccacagcgtgtatgtgggtgatgcttctctatgcatcagcaaggaagtggtggcgctgtg  
gagcttctcagctacagggcggccagcggagagaagcaggtcccactctgatgatggacacgagttctctgaattcacaccggacat  
cactccatcatgctgctgcccacaccaactacgaatcatcaaatgctgtcaaaaacgggtcactatcccacggccccaccagat  
ccgctgcaactgtgtgagtggtgtctatgttcagaggtagacagcctgcgccactctcgtcccagactgaacatctataaggctctggcaagc  
ccctcactcattgcttcaagtgggacccatcctaactgcctccgctggtggtgagctcaaggagctcagcaaggtggagaatgagt  
tcaaggccgagatgaggagctctcagcagtgcaagctcttggcaagacactgctggaccaagctcggagctccagggaactggagatc  
atcctcaaccatcgagatgaccacagtggaagagcttgaccctcagaagtaccatgacctggccaagttgaagggtggcaatcaataaccacc  
agaaagagttgtgctcagcccaactccaacagttgcttgcaccctgtggtatgatggcttccctggatggcgggcggaaacactgggtagtc  
aagcttcaacctgcatgaccattgggtcctgtttccatgctgtctatagcctacctgatctcaccaggagcaacctgggctgttcatcaagaa  
acccttatacaagttatctgccaacacagcatcctattgacctcctcttattgcttctcctgctcagcacattgtcaggacagacctcatgtac  
aggggctcccccaactgctggtgaatggatgatattgcttgggtctagggttcttgggtgagattaaggaatgtgggtggtgattact  
gaatacatcatgactggtggaacctgatgattttgcaatgaactcccctacctggaactattccctgaagattgtggcctatgcaagtata  
atggttctcgtcaaggagggaatgggaaatgtggcaccgactctgattgcggaagcactcttgcgaatatcaacatttaagttcgttgcgtc  
tcatatccctgttcacagccaactcccacttaggacctctgcagatctttgggacgcatgctgcttgatatcctcaaatcctcttatctactgctc  
ggtactactagctttgccaatggactgaaccagcttacttctattatgaaaccagagctatcgatgagcctaacaactgcaaggggattccgat  
gtgagaaacagaacaatgccttctccacgctcttgagactctcagtcactcttctggtctgatttggcctttaaatctatgtcaccaatgtgaa  
agccagacacgaattcaccgagttgtaggagctaccatgttggaaacatacaatgtcatctccctggtagtctgctgaacatgctgattgctat  
gatgaacaactcctatcagctattgcccgatcatgctgatacagagtggagtttgaaggacgaagctctggatgagttacttggatgaagggtg  
caccttgcacctccttcaacatcatcccagcccccaagtcatttctataccttgtaactggttcaacaacaccttctgccccaaaagagacc  
tgacggtagacggagaaggcgcaacttgagaagttcacagaacgcaatgctgacagcctgatacaaaatcaacattatcaggaagttatc



CACAAATTTACAAATAAAGCATTTTTTTTCACTGCATTCTAGTTGTGGTTTGTCCAAACTCATCAAT  
GTATCTTATCATGTCTGTATACCGTCGACCTCTAGCTAGAGCTTGCGTAATCATGGTCATAGCT  
GTTTCCTGTGTGAAATTGTTATCCGCTCACAAATCCACACAACATACGAGCCGGAAGCATAAAGT  
GTAAAGCCTGGGGTGCCTAATGAGTGAGCTAACTCACATTAATTGCGTTGCGCTCACTGCCCGC  
TTTCCAGTCGGGAAACCTGTCGTGCCAGCTGCATTAATGAATCGGCCAACGCGCGGGGAGAGG  
CGTTTTGCGTATTGGGCGCTCTTCCGCTTCTCGCTCACTGACTCGCTGCGCTCGGTGCTTCGG  
CTGCGGCGAGCGGTATCAGCTCACTCAAAGGCGGTAATACGGTTATCCACAGAATCAGGGGATA  
ACGCAGGAAAGAACATGTGAGCAAAAGGCCAGCAAAAGGCCAGGAACCGTAAAAGGCCGCGT  
TGCTGGCGTTTTTCCATAGGCTCCGCCCCCTGACGAGCATCACAAAATCGACGCTCAAGTCA  
GAGGTGGCGAAACCCGACAGGACTATAAGATACCAGGCGTTTCCCCTGGAAGCTCCCTCGT  
CGCTCTCCTGTTCCGACCCTGCCGCTTACCGGATACCTGTCCGCTTTCTCCCTTCGGGAAGCG  
TGCGCTTTCTCATAGCTCACGCTGTAGGTATCTCAGTTCGGTGTAGGTGTTTCGCTCCAAGCTG  
GGCTGTGTGCACGAACCCCGTTCAGCCCGACCGCTGCGCTTATCCGGTAACATCGTCTTG  
AGTCCAACCCGGTAAGACACGACTTATCGCCACTGGCAGCAGCCACTGGTAACAGGATTAGCA  
AGCGAGGTATGTAGGCGGTGCTACAGAGTCTTGAAGTGGTGGCCTAACTACGGCTACACTAGA  
AGAACAGTATTTGGTATCTGCGCTCTGCTGAAGCCAGTTACCTTCGGAAAAAGAGTTGGTAGCTC  
TTGATCCGGCAAACAAACCACCGCTGGTAGCGTTTTTTTTGTTTGCAAGCAGCAGATTACGCGCA  
GAAAAAAGGATCTCAAGAAGATCCTTTGATCTTTTACGGGGTCTGACGCTCAGTGGAACGAA  
AACTCACGTTAAGGGATTTTGGTCATGAGATTATCAAAAAGGATCTTCACCTAGATCCTTTTAAAT  
TAAAAATGAAGTTTTAAATCAATCTAAAGTATATAGAGTAACTTGGTCTGACAGTTACCAATGCT  
TAATCAGTGAGGCACCTATCTCAGCGATCTGTCTATTTTCGTTTCATCCATAGTTGCCTGACTCCCC  
GTCGTGTAGATAACTACGATACGGGAGGGCTTACCATCTGGCCCCAGTGCTGCAATGATACCGC  
GAGACCCACGCTCACCGGCTCCAGATTTATCAGCAATAAACCAGCCAGCCGGAAGGGCCGAGC  
GCAGAAGTGGTCTGCAACTTTATCCGCTCCATCCAGTCTATTAATTGTTGCCGGGAAGCTAGA  
GTAAGTAGTTCGCCAGTTAATAGTTTGCGCAACGTTGTTGCCATTGCTACAGGCATCGTGGTGT  
ACGCTCGTCTTTGGTATGGCTTCATTACGCTCCGGTCCCAACGATCAAGGCGAGTTACATGAT  
CCCCATGTTGTGCAAAAAGCGGTTAGCTCCTTCGGTCTCCGATCGTTGTCAGAAGTAAGTTG  
GCCGCAGTGTTATCACTCATGTTATGGCAGCACTGCATAATTCTTACTGTCATGCCATCCGT  
AAGATGCTTTTTCTGTGACTGGTGAGTACTCAACCAAGTCATTCTGAGAATAGTGATGCGGCGAC  
CGAGTTGCTCTTGGCCGGCGTCAATACGGGATAATACCGCGCCACATAGCAGAAGTTTAAAAGT  
GCTCATCATTGGAACGTTCTTTCGGGGCGAAAACCTCTCAAGGATCTTACCGCTGTTGAGATCCA  
GTTTCGATGTAACCCACTCGTGCACCCAATGATCTTCAGCATCTTTTACTTTACCCAGCGTTTCTG  
GGTGAGCAAAAACAGGAAGGCAAAAATGCCGCAAAAAGGGAATAAGGGCGACACGGAAATGTT  
GAATACTCATACTCTTCTTTTCAATATTGAAGCATTATCAGGGTTATTGTCTCATGAGCGG  
ATACATATTTGAATGTATTTAGAAAAATAAACAATAGGGGTTCCGCGCACATTTCCCCGAAAAGT  
GCCACCTGACGTC

**pcDNA4/TO/TRPC4-TRPC1**

blue = hTRPC5

green = hTRPC1

GACGGATCGGGAGATCTCCCGATCCCCTATGGTGCCTCTCAGTACAATCTGCTCTGATGCCGC  
ATAGTTAAGCCAGTATCTGCTCCCTGCTTGTGTGTTGGAGGTCGCTGAGTAGTGCGCGAGCAA  
ATTTAAGCTACAACAAGGCAAGGCTTGACCGACAATTGCATGAAGAATCTGCTTAGGGTTAGGCG  
TTTTGCGCTGCTTCGCGATGTACGGGCCAGATATACGCGTTGACATTGATTATTGACTAGTTATTA  
ATAGTAATCAATTACGGGGTCAATTAGTTCATAGCCCATATATGGAGTTCGCGTTACATAACTTAC  
GGTAAATGGCCCGCCTGGCTGACCGCCCAACGACCCCGCCATTGACGTCAATAATGACGTAT  
GTTCCCATAGTAACGCCAATAGGGACTTTCCATTGACGTCAATGGGTGGAGTATTTACGGTAAAC  
TGCCCACTTGGCAGTACATCAAGTGTATCATATGCCAAGTACGCCCCCTATTGACGTCAATGACG  
GTAAATGGCCCGCCTGGCATTATGCCAGTACATGACCTTATGGGACTTTCTACTTGGCAGTAC  
ATCTACGTATTAGTCATCGCTATTACCATGGTGTATGCGTTTTGGCAGTACATCAATGGGCGTGG  
ATAGCGGTTTGACTCACGGGATTTCCAAGTCTCCACCCATTGACGTCAATGGGAGTTTGT  
GGAACCAAAATCAACGGGACTTTCCAAAATGTCGTAACAACCTCCGCCCATGACGCAAATGGG  
CGGTAGGCGTGTACGGTGGGAGGTCTATATAAGCAGAGCTCTCCCTATCAGTGATAGAGATCTC  
CCTATCAGTGATAGAGATCGTCGACGAGCTCGTTTGTGAACCGTCAGATCGCCTGGAGACGCC  
ATCCACGCTGTTTTGACCTCCATAGAAGACACCGGGACCGATCCAGCCTCCGGACTCTAGCGTT  
TAACTTAAGCTTGGTACCGAGCTCGGATCCGCCACC



AGTGGGCCATCGCCCTGATAGACGGTTTTTCGCCCTTTGACGTTGGAGTCCACGTTCTTTAATAG  
TGGACTCTTGTTCCAAACTGGAACAACACTCAACCCTATCTCGGTCTATTCTTTTGATTTATAAGG  
GATTTTGGCGATTTTCGGCCTATTGGTTAAAAAATGAGCTGATTTAACAAAAATTTAACGCGAATTA  
ATTCTGTGGAATGTGTGTGTCAGTTAGGGTGTGGAAAGTCCCCAGGCTCCCCAGCAGGCAGAAGTA  
TGCAAAGCATGCATCTCAATTAGTCAGCAACCAGGTGTGGAAAGTCCCCAGGCTCCCCAGCAGG  
CAGAAGTATGCAAAGCATGCATCTCAATTAGTCAGCAACCATAGTCCCGCCCCTAACTCCGCCCA  
TCCCGCCCCTAACTCCGCCCAGTTCGCCCATTTCTCCGCCCATGGCTGACTAATTTTTTTTTATT  
TATGCAGAGGCCGAGGCCGCCTCTGCCTCTGAGCTATTCCAGAAGTAGTGAGGAGGCTTTTTTG  
GAGGCCTAGGCTTTTTGCAAAAAGCTCCCGGGAGCTTGTATATCCATTTTCGGATCTGATCAGCAC  
GTGTTGACAATTAATCATCGGCATAGTATATCGGCATAGTATAATACGACAAGGTGAGGAACTAA  
ACCATGGCCAAGTTGACCAGTGCCGTTCCGGTGCTCACCGCGCGCGACGTCGCCGGAGCGGTG  
GAGTTCTGGACCGACCGGCTCGGGTTCTCCCGGGACTTCGTGGAGGACGACTTCGCCGGTGTG  
GTCCGGGACGACGTGACCCTGTTTCATCAGCGCGGTCCAGGACCAGGTGGTCCGGGACAACACC  
CTGGCCTGGGTGTGGGTGCGCGGCCTGGACGAGCTGTACGCCGAGTGGTCCGGAGGTCTGTGTC  
CACGAACCTCCGGGACGCCTCCGGGCCGCCATGACCGAGATCGGCCGAGCAGCGTGGGGGC  
GGGAGTTCGCCCTGCGCGACCCGGCCGCAACTGCGTGCATTCGTGGCCGAGGAGCAGGAC  
TGACACGTGCTACGAGATTTTCGATTCCACCGCGCCTTCTATGAAAGGTTGGGCTTCGGAATCG  
TTTTCCGGGACGCCGGCTGGATGATCCTCCAGCGCGGGGATCTCATGCTGGAGTTCCTCGCCCA  
CCCCAACTTGTTTATTGCAGCTTATAATGGTTACAAATAAAGCAATAGCATCACAAATTTACAAAT  
AAAGCATTTTTTTCACTGCATTCTAGTTGTGGTTTGTCCAAACTCATCAATGTATCTTATCATGTCT  
GTATACCGTGCACCTCTAGCTAGAGCTTGGCGTAATCATGGTCATAGCTGTTTCTGTGTGAAT  
TGTTATCCGCTCACAATTCCACACAACATACGAGCCGGAAGCATAAAGTGTAAAGCCTGGGGTG  
CCTAATGAGTGAGCTAACTCACATTAATTGCGTTGCGCTCACTGCCCGTTTTCCAGTCGGGAAAC  
CTGTGCTGCCAGCTGCATTAATGAATCGGCCAACGCGCGGGGAGAGGCGGTTTTGCGTATTGGG  
CGCTCTTCCGCTTCTCGCTCACTGACTCGCTGCGCTCGGTGCTTCGGCTGCGGCGAGCGGTA  
TCAGCTCACTCAAAGCGGTAATACGGTTATCCACAGAATCAGGGGATAACGCAGGAAAGAACA  
TGTGAGCAAAGGCCAGCAAAGGCCAGGAACCGTAAAAAGGCCGCGTTGCTGGCGTTTTTCCA  
TAGGCTCCGCCCCCTGACGAGCATCACAAAAATCGACGCTCAAGTCAGAGGTGGCGAAACCC  
GACAGGACTATAAAGATACCAGGCGTTTTCCCTGGAAGCTCCCTCGTGCGCTCTCCTGTTCCG  
ACCCTGCCGCTTACCGGATACCTGTCCGCCTTTCTCCCTTCGGGAAGCGTGGCGCTTTCTCATA  
GCTCACGCTGTAGGTATCTCAGTTCGGTGTAGGTGCTTCGCTCCAAGCTGGGCTGTGTGCACGA  
ACCCCCGTTCCAGCCCGACCGCTGCGCCTTATCCGGTAACTATCGTCTTGAGTCCAACCCGGTA  
AGACACGACTTATCGCCACTGGCAGCAGCCACTGGTAACAGGATTAGCAGAGCGAGGTATGTAG  
GCGGTGCTACAGAGTTCTTGAAGTGGTGGCCTAACTACGGCTACACTAGAAGAACAGTATTTGG  
TATCTGCGCTCTGCTGAAGCCAGTTACCTTCGGAAAAAGAGTTGGTAGCTCTTGATCCGGCAAAC  
AAACCCGCTTTGTAGCGGTTTTTTTTGTTTCAAGCAGCAGATTACGCGCAGAAAAAAGGATCT  
CAAGAAGATCCTTTGATCTTTTTCTACGGGTCTGACGCTCAGTGGAACGAAAACTCACGTTAAGG  
GATTTTGGTCATGAGATTATCAAAAAGGATCTTACCTAGATCCTTTTTAAATTAATAAATGAAGTTTT  
AAATCAATCTAAAGTATATATGAGTAACTTGGTCTGACAGTTACCAATGCTTAATCAGTGAGGCA  
CCTATCTCAGCGATCTGTCTATTTTCGTTTCATCCATAGTTGCCTGACTCCCCGTCGTGTAGATACT  
ACGATACGGGAGGGCTTACCATCTGGCCCCAGTGCTGCAATGATACCGCGAGACCCACGCTCA  
CCGGCTCCAGATTTATCAGCAATAAACCAGCCAGCCGGAAGGGCCGAGCGCAGAAGTGGTCCT  
GCAACTTTATCCGCCTCCATCCAGTCTATTAATTGTTGCCGGGAAGCTAGAGTAAGTAGTTCGCC  
AGTTAATAGTTTGCACAACGTTGTTGCCATTGCTACAGGCATCGTGGTGTACGCTCGTCGTTTTG  
GTATGGCTTCATTAGCTCCGGTTCCTAACGATCAAGGCGAGTTACATGATCCCCCATGTTGTGC  
AAAAAAGCGGTTAGCTCCTTCGGTCTCCGATCGTTGTCAGAAGTAAGTTGGCCGAGTGTATC  
ACTCATGGTTATGGCAGCACTGCATAATTCTTACTGTGTCATGCCATCCGTAAGATGCTTTTTCTGT  
GACTGGTGAGTACTCAACCAAGTCATTCTGAGAATAGTGTATGCGGCGACCGAGTTGCTCTTGC  
CCGGCGTCAATACGGGATAATACCGCGCCACATAGCAGAACTTTAAAAGTGCTCATCATTGGAAA  
ACGTTCTTCGGGGCGAAAACTCTCAAGGATCTTACCCTGTTGAGATCCAGTTCGATGTAACCCA  
CTCGTGCACCCAACTGATCTTCAGCATTTTTACTTTACCAGCGTTTTCTGGGTGAGCAAAAACA  
GGAAGGCAAATGCCGCAAAAAGGGAATAAGGGCGACACGGAAATGTTGAATACTCATACTCT  
TCCTTTTTCAATATTATTGAAGCATTTATCAGGGTATTGTCTCATGAGCGGATACATATTTGAATG  
TATTTAGAAAAATAAACAATAGGGGTTCCGCGCACATTTCCCCGAAAAGTGCCACCTGACGTC

## Supplementary References

1. R. Gallaschun and B. Chenard, Substituted Xanthenes and Methods of Use Thereof. WO2014143799A3, **2014**.
2. J. Schindelin, I. Arganda-Carreras, E. Frise, V. Kaynig, M. Longair, T. Pietzsch, S. Preibisch, C. Rueden, S. Saalfeld, B. Schmid, J. Y. Tinevez, D. J. White, V. Hartenstein, K. Eliceiri, P. Tomancak and A. Cardona, Fiji: an open-source platform for biological-image analysis. *Nat. Methods*, **2012**, *9*, 676–682.
3. L. Wang, Y. Murai, T. Yoshida, A. Ishida, K. Masuda, Y. Sakihama, Y. Hashidoko, Y. Hatanaka and M. Hashimoto, Alternative One-Pot Synthesis of (Trifluoromethyl)phenyldiazirines from Tosyloxime Derivatives: Application for New Synthesis of Optically Pure Diazirinyphenylalanines for Photoaffinity Labeling. *Org. Lett.* **2015**, *17*, 616–619.
4. M. R. Bond, H. Zhang, P. D. Vu and J. J. Kohler, Photocrosslinking of glycoconjugates using metabolically incorporated diazirine-containing sugars. *Nat. Protoc.* **2009**, *4*, 1044–1063.
5. M.-G. Song and R. S. Sheridan, Regiochemical Substituent Switching of Spin States in Aryl(trifluoromethyl)carbenes. *J. Am. Chem. Soc.* **2011**, *133*, 19688–19690.
6. S. Ghiassian, H. Ismaili, B. D. W. Lubbock, J. W. Dube, P. J. Ragogna and M. S. Workentin, Photoinduced Carbene Generation from Diazirine Modified Task Specific Phosphonium Salts To Prepare Robust Hydrophobic Coatings. *Langmuir* **2012**, *28*, 12326–12333.
7. H. N. Rubaiy, M. J. Ludlow, M. Henrot, H. J. Gaunt, K. Miteva, S. Y. Cheung, Y. Tanahashi, N. Hamzah, K. E. Musialowski, N. M. Blythe, H. L. Appleby, M. A. Bailey, L. McKeown, R. Taylor, R. Foster, H. Waldmann, P. Nussbaumer, M. Christmann, R. S. Bon, K. Muraki and D. J. Beech, Picomolar, selective, and subtype-specific small-molecule inhibition of TRPC1/4/5 channels. *J. Biol. Chem.* **2017**, *292*, 8158–8173.
8. R. Naik, M. Won, H. S. Ban, D. Bhattarai, X. Xu, Y. Eo, Y. S. Hong, S. Singh, Y. Choi, H.-C. Ahn and K. Lee, Synthesis and Structure–Activity Relationship Study of Chemical Probes as Hypoxia Induced Factor-1 $\alpha$ /Malate Dehydrogenase 2 Inhibitors. *J. Med. Chem.* **2014**, *57*, 9522–9538.
9. M. Srinivasan, S. Sankararaman, H. Hopf, I. Dix and P. G. Jones, Syntheses and Structures of Isomeric [6.6]- and [8.8]Cyclophanes with 1,4-Dioxabut-2-yne and 1,6-Dioxahexa-2,4-diyne Bridges, *J. Org. Chem.* **2001**, *66*, 4299–4303.
10. J. E. Horne, M. Walko, A. N. Calabrese, M. A. Levenstein, D. J. Brockwell, N. Kapur, A. J. Wilson and S. E. Radford, Rapid Mapping of Protein Interactions Using Tag-Transfer Photocrosslinkers, *Angew. Chem. Int. Ed.* **2018**, *57*, 16688–16692.
